# Supplementary material
Source: MDPI journal article supplement (https://www.mdpi.com/2076-3417/11/24/11779)
Supplement: s1 [file s1]

Archive with 2 entries (2 files):
- applsci-1461551-Supplementary.pdf
- Supplementary data tables.xlsx
