# Supplementary material
Source: MDPI journal article supplement (https://www.mdpi.com/2076-3417/11/24/11779)
Supplement: s1 [file s1 › Supplementary data tables.xlsx]

## Sheet: roasted data
	Municipality	Farm	Fermentation time	SolarDry	Variety	sample	weight
334_A	1	2	24	2	4	16	0.195
334_B	1	2	24	2	4	16	0.192
334_C	1	2	24	2	4	16	0.213
334_D	1	2	24	2	4	16	0.203
334_E	1	2	24	2	4	16	0.216
335_A	1	2	24	1	4	15	0.221
335_B	1	2	24	1	4	15	0.208
335_C	1	2	24	1	4	15	0.21
335_D	1	2	24	1	4	15	0.224
335_E	1	2	24	1	4	15	0.219
336_A	1	2	12	2	4	14	0.224
336_B	1	2	12	2	4	14	0.195
336_C	1	2	12	2	4	14	0.192
336_D	1	2	12	2	4	14	0.215
336_E	1	2	12	2	4	14	0.195
337_A	1	2	12	1	4	13	0.203
337_B	1	2	12	1	4	13	0.215
337_C	1	2	12	1	4	13	0.221
337_D	1	2	12	1	4	13	0.19
337_E	1	2	12	1	4	13	0.194
338_A	1	2	24	2	5	20	0.205
338_B	1	2	24	2	5	20	0.194
338_C	1	2	24	2	5	20	0.196
338_D	1	2	24	2	5	20	0.196
338_E	1	2	24	2	5	20	0.207
339_A	1	2	24	1	5	19	0.2
339_B	1	2	24	1	5	19	0.215
339_C	1	2	24	1	5	19	0.2
339_D	1	2	24	1	5	19	0.199
339_E	1	2	24	1	5	19	0.205
340_A	1	2	12	2	5	18	0.212
340_B	1	2	12	2	5	18	0.19
340_C	1	2	12	2	5	18	0.22
340_D	1	2	12	2	5	18	0.213
340_E	1	2	12	2	5	18	0.195
341_A	1	2	12	1	5	17	0.192
341_B	1	2	12	1	5	17	0.22
341_C	1	2	12	1	5	17	0.205
341_D	1	2	12	1	5	17	0.206
341_E	1	2	12	1	5	17	0.21
342_A	1	2	24	2	3	24	0.217
342_B	1	2	24	2	3	24	0.221
342_C	1	2	24	2	3	24	0.209
342_D	1	2	24	2	3	24	0.21
342_E	1	2	24	2	3	24	0.197
343_A	1	2	24	1	3	23	0.209
343_B	1	2	24	1	3	23	0.217
343_C	1	2	24	1	3	23	0.193
343_D	1	2	24	1	3	23	0.203
343_E	1	2	24	1	3	23	0.2
344_A	1	2	12	2	3	22	0.215
344_B	1	2	12	2	3	22	0.202
344_C	1	2	12	2	3	22	0.208
344_D	1	2	12	2	3	22	0.214
344_E	1	2	12	2	3	22	0.225
345_A	1	2	12	1	3	21	0.207
345_B	1	2	12	1	3	21	0.2
345_C	1	2	12	1	3	21	0.208
345_D	1	2	12	1	3	21	0.226
345_E	1	2	12	1	3	21	0.21
346_A	1	1	12	1	1	1	0.21
346_B	1	1	12	1	1	1	0.227
346_C	1	1	12	1	1	1	0.226
346_D	1	1	12	1	1	1	0.217
346_E	1	1	12	1	1	1	0.2
347_A	1	1	12	2	1	2	0.204
347_B	1	1	12	2	1	2	0.2
347_C	1	1	12	2	1	2	0.195
347_D	1	1	12	2	1	2	0.216
347_E	1	1	12	2	1	2	0.2
348_A	1	1	24	1	1	3	0.19
348_B	1	1	24	1	1	3	0.224
348_C	1	1	24	1	1	3	0.192
348_D	1	1	24	1	1	3	0.192
348_E	1	1	24	1	1	3	0.229
349_A	1	1	24	2	1	4	0.197
349_B	1	1	24	2	1	4	0.209
349_C	1	1	24	2	1	4	0.204
349_D	1	1	24	2	1	4	0.204
349_E	1	1	24	2	1	4	0.192
350_A	1	1	24	1	2	7	0.2
350_B	1	1	24	1	2	7	0.206
350_C	1	1	24	1	2	7	0.2
350_D	1	1	24	1	2	7	0.19
350_E	1	1	24	1	2	7	0.22
351_A	1	1	24	2	2	8	0.2
351_B	1	1	24	2	2	8	0.21
351_C	1	1	24	2	2	8	0.2
351_D	1	1	24	2	2	8	0.2
351_E	1	1	24	2	2	8	0.215
352_A	1	1	12	1	2	5	0.21
352_B	1	1	12	1	2	5	0.208
352_C	1	1	12	1	2	5	0.211
352_D	1	1	12	1	2	5	0.199
352_E	1	1	12	1	2	5	0.203
353_A	1	1	12	2	2	6	0.214
353_B	1	1	12	2	2	6	0.216
353_C	1	1	12	2	2	6	0.206
353_D	1	1	12	2	2	6	0.206
353_E	1	1	12	2	2	6	0.2
354_A	1	1	24	1	3	11	0.213
354_B	1	1	24	1	3	11	0.195
354_C	1	1	24	1	3	11	0.207
354_D	1	1	24	1	3	11	0.221
354_E	1	1	24	1	3	11	0.209
355_A	1	1	24	2	3	12	0.214
355_B	1	1	24	2	3	12	0.2
355_C	1	1	24	2	3	12	0.208
355_D	1	1	24	2	3	12	0.218
355_E	1	1	24	2	3	12	0.199
356_A	1	1	12	1	3	9	0.1966
356_B	1	1	12	1	3	9	0.216
356_C	1	1	12	1	3	9	0.196
356_D	1	1	12	1	3	9	0.204
356_E	1	1	12	1	3	9	0.217
357_A	1	1	12	2	3	10	0.223
357_B	1	1	12	2	3	10	0.196
357_C	1	1	12	2	3	10	0.215
357_D	1	1	12	2	3	10	0.218
357_E	1	1	12	2	3	10	0.209
358_A	2	3	12	1	7	33	0.195
358_B	2	3	12	1	7	33	0.21
358_C	2	3	12	1	7	33	0.228
358_D	2	3	12	1	7	33	0.205
358_E	2	3	12	1	7	33	0.216
359_A	2	3	12	2	7	34	0.21
359_B	2	3	12	2	7	34	0.207
359_C	2	3	12	2	7	34	0.19
359_D	2	3	12	2	7	34	0.216
359_E	2	3	12	2	7	34	0.19
360_A	2	3	24	1	7	35	0.215
360_B	2	3	24	1	7	35	0.211
360_C	2	3	24	1	7	35	0.197
360_D	2	3	24	1	7	35	0.2
360_E	2	3	24	1	7	35	0.202
361_B	2	3	24	2	7	36	0.202
361_C	2	3	24	2	7	36	0.209
361_D	2	3	24	2	7	36	0.197
361_E	2	3	24	2	7	36	0.196
362_A	2	3	12	1	1	25	0.198
362_B	2	3	12	1	1	25	0.191
362_C	2	3	12	1	1	25	0.207
362_D	2	3	12	1	1	25	0.224
362_E	2	3	12	1	1	25	0.217
363_A	2	3	12	2	1	26	0.193
363_B	2	3	12	2	1	26	0.208
363_C	2	3	12	2	1	26	0.217
363_D	2	3	12	2	1	26	0.214
363_E	2	3	12	2	1	26	0.203
364_A	2	3	24	1	1	27	0.203
364_B	2	3	24	1	1	27	0.204
364_C	2	3	24	1	1	27	0.217
364_D	2	3	24	1	1	27	0.1956
364_E	2	3	24	1	1	27	0.208
365_A	2	3	24	2	1	28	0.22
365_B	2	3	24	2	1	28	0.205
365_C	2	3	24	2	1	28	0.22
365_D	2	3	24	2	1	28	0.215
365_E	2	3	24	2	1	28	0.22
366_A	2	3	12	1	6	29	0.212
366_B	2	3	12	1	6	29	0.21
366_C	2	3	12	1	6	29	0.204
366_D	2	3	12	1	6	29	0.216
366_E	2	3	12	1	6	29	0.211
367_A	2	3	12	2	6	30	0.192
367_B	2	3	12	2	6	30	0.204
367_C	2	3	12	2	6	30	0.197
367_D	2	3	12	2	6	30	0.191
367_E	2	3	12	2	6	30	0.225
368_A	2	3	24	1	6	31	0.22
368_B	2	3	24	1	6	31	0.212
368_C	2	3	24	1	6	31	0.213
368_D	2	3	24	1	6	31	0.207
368_E	2	3	24	1	6	31	0.198
369_A	2	3	24	2	6	32	0.197
369_C	2	3	24	2	6	32	0.192
369_D	2	3	24	2	6	32	0.21
369_E	2	3	24	2	6	32	0.21

## Sheet: Buchet-roasted
	10.000_9.980	9.980_9.960	9.960_9.940	9.940_9.920	9.920_9.900	9.900_9.880	9.880_9.860	9.860_9.840	9.840_9.820	9.820_9.800	9.800_9.780	9.780_9.760	9.760_9.740	9.740_9.720	9.720_9.700	9.700_9.680	9.680_9.660	9.660_9.640	9.640_9.620	9.620_9.600	9.600_9.580	9.580_9.560	9.560_9.540	9.540_9.520	9.520_9.500	9.500_9.480	9.480_9.460	9.460_9.440	9.440_9.420	9.420_9.400	9.400_9.380	9.380_9.360	9.360_9.340	9.340_9.320	9.320_9.300	9.300_9.280	9.280_9.260	9.260_9.240	9.240_9.220	9.220_9.200	9.200_9.180	9.180_9.160	9.160_9.140	9.140_9.120	9.120_9.100	9.100_9.080	9.080_9.060	9.060_9.040	9.040_9.020
334_A	6354.33	15787.1	13473	21463.1	15513.5	880.74	11512.3	25764.6	9168.8	20342.7	13547.2	17496.8	9900.8	9009.41	76073.1	95043.2	34427.8	23900.4	13910.5	30256.8	37524.3	8259.22	74684.3	43172.2	211765	199444	146783	740938	57648.5	60463.5	53152.6	132263	139515	85398.7	195484	60961	54569.9	45898.7	42634.4	60413.2	53803.8	71858.3	246649	9.137e+06	2.8192e+06	235673	127918	95097.8	59680.4
334_B	-113.2	1672.88	2881.52	-6402.59	6118.99	2883.92	-4070.81	8586.73	-5096.43	17099.7	3918.21	9086.13	10627.1	9160.06	67077.9	81935.1	18932.1	13603	4677.98	24005.4	19963	17807.1	56066	12267.8	210168	190491	157088	730211	56632.2	41483.1	41768.1	123741	122274	89416.7	211721	71797.5	64031.5	44136.4	43163.1	51754.2	41925.1	84369.9	210503	9.04672e+06	2.7883e+06	221868	117512	91427.1	66439.8
334_C	8646.48	22962.5	15110.6	3822.43	24656	10623.4	14028.6	36128.8	25002.9	18594.7	35766	38164.9	29725.1	29778	105846	116778	36143	28161.8	27713.4	41676.4	45906.5	33992.2	67207.7	62949.3	201801	261342	142432	830440	81304.1	73246	76018.8	156983	176607	91486.8	233056	87017.3	67247.4	58551.8	64572.5	58902.8	78138.1	110946	250453	9.54941e+06	3.66336e+06	283095	147268	125204	77298.5
334_D	16601.1	14773.2	22162.6	10664.6	27641.6	24038.4	8279.71	19707.7	20264.3	17650.4	33655.3	7850.91	18137.5	25298.1	76685.3	94711.2	53108.8	25598.4	35889.3	37596.5	44104.7	27668.8	69665.7	40640.8	230855	157669	190069	628445	62254.5	73551.3	79372.2	167586	144116	107083	196623	69400.9	65710.3	56173.5	69300.7	70221.1	74421.2	97766.6	293185	1.02038e+07	2.0755e+06	223137	129535	101908	79506.2
334_E	7769.4	10068.5	15981.6	5491.25	2027.34	2773.1	9157.15	8928.66	15440.3	9885.01	8939.9	8174.92	15066.5	1529.52	80566.6	95794.3	27694	12435	22109.8	33559.7	27929.8	28095.7	69284.8	34711.4	191058	244098	112870	816791	67715.2	62079.3	67049	132900	171421	94699	216928	75578.7	74552	54080.4	44357.5	56292.7	66188	89488.8	237379	9.08098e+06	4.53983e+06	319789	150234	124228	77591.8
335_A	33716.6	32815.6	34523.3	31638.3	27018.9	21299.1	18588	41187.5	21003.5	33719.6	26311.7	37033	29769.7	31544.8	105757	128834	37966.1	29498.9	31817.2	60390.2	56694.3	50396.9	75379.3	81944.1	230665	291508	152431	890853	96248.5	73474	93945.8	164189	204368	122649	253373	93466.2	76887.2	86068.5	77114.8	72721.3	86737.7	117596	297781	9.99401e+06	3.46244e+06	270765	169876	142199	95219.8
335_B	27499.6	13898	8071.88	7847.99	28914.2	23874.5	27554.7	19906.9	34705.4	41119.4	18413.3	13820.9	26089.8	21425	88160.6	121330	26076.8	26363	24983.7	41386.4	49920.4	34636	81852.2	62557.5	268196	198150	195594	794960	72870.1	76103.9	74263.3	178108	151228	93820.7	219700	82773.8	78668.5	61813.5	67834.9	82564.7	68105.4	103924	288287	9.40609e+06	2.82891e+06	250687	136606	111839	95065.6
335_C	-5507.15	-6364.94	12839	6597.07	14998.4	10135.5	9736.97	11790.8	8545.89	16416.1	-2462.67	13032.2	11603.4	46197.6	89341.5	107405	30842.7	14909.6	19391.8	41503.4	43677.3	42288.1	74941.2	37387.9	289021	255710	185495	965696	73557.1	67949.9	66633.7	154140	141778	100905	226505	60532.5	75894	51732.2	49809.5	58330.2	52266.6	93899	229407	9.57206e+06	3.21885e+06	249553	133414	109077	67701
335_D	-11629.3	-4816.38	8184.33	3324.67	513.543	-3741.06	-15626.3	467.791	-3603.03	-5868.78	4184.7	-11247.7	-3419.88	18149	65050	89451.4	18892.9	1127.34	-2493.94	30132	22750.9	14332.9	43902.2	36901.2	214859	240171	133434	889958	48940.4	48339.6	51743.9	131978	153546	86331.7	213929	47574	36857.9	18136.4	35067.8	30647.1	42934	69895	247136	10733078	4.24965e+06	324547	158406	118328	81554.3
335_E	6854.88	20099.9	7888.93	4026.1	-3502.6	-2602.12	12201.6	329.105	3474.2	9440.89	9981.81	-3461.45	1182.36	2222.69	70387	86623.2	29389.9	17021.8	27416.1	18679.8	33911.1	4786.56	46208.5	32684.2	189152	218872	125770	788208	50747.1	47681.6	52715.6	146630	173474	100413	227383	77843	61234.1	33784	36923.8	38563.7	53503.9	81561.5	222370	9.00382e+06	3.43203e+06	233973	129530	107129	69410.3
336_A	-3848.21	-5714.17	-12663.6	1315.23	-4892.33	-3439.7	-4771.47	-17032.7	1392.55	-6065.21	3416.21	-8307.25	6534.38	7935.44	79904	83708.1	20170.5	-2209.72	1053.68	25862.9	28229.9	12781.2	41568.7	23383.5	191743	222151	123168	774191	50404.3	31907.5	49343.4	104552	152843	69880.1	197978	47405.5	48494.8	18104.6	17268	12322.2	41447.9	67066.2	240378	9.68069e+06	3.35522e+06	269370	122582	94901.7	38866.2
336_B	26879.9	11875.8	-1342.42	7597.27	24906.4	13944.2	8954.8	12676.5	7824.49	7931.77	10216.8	7048.24	12752.9	33996.8	102531	89854.3	31742.4	20890.3	16615.3	36910.3	33068.7	31847.9	65085.3	37872.9	236227	171220	160680	649172	55050.4	63390.4	61258.8	147272	126453	90288.4	182787	60483.7	49526.4	52056.2	41785.4	41889.2	48959.7	73721.4	243901	8.80955e+06	2.45659e+06	218837	108532	98827.4	70071.9
336_C	-6440.12	8713.79	9401.77	7438.82	16771	5748.61	9638.39	16660.2	12053	-3841.46	4007.81	25305.1	3776.28	30452.1	69711	71980.8	19436.9	24750.6	16292.3	40215.6	32827.2	14195.7	66613.5	24924.2	201288	134509	139945	581688	39934.6	53243.3	46283.9	136953	108402	86542.2	172684	54769.6	49283.9	27177.3	31408	33053.6	45676.4	49589.6	224738	9.04459e+06	2.13997e+06	193549	101463	77500.2	65354
336_D	-7038.23	9321.53	-61.2217	-1612.75	-7770.47	-13858.9	-11150.1	-6150.08	-2263.86	7505.34	-1241.17	-7237.56	9222.07	24920.6	62706.5	74035.5	10289.5	7779.73	5443.86	3383.92	16743	14606.8	30077.4	31262	167163	173004	102028	627398	47309.9	39287.3	34877.3	119141	135123	74940.2	176260	42422.7	44666.3	27184.3	20739.5	22337.5	19647	64194.1	236081	1.0421e+07	2.97517e+06	251388	141733	98899.7	68272.6
336_E	4058.93	12188.6	9664	8365.62	-3410.42	2116.17	5315.2	11496.2	13658.2	18713.4	2723.81	-1227.63	7948.7	15094.7	77258.5	87480.2	32451	4688.35	8074.82	6707.4	32424.6	26290.3	62209.5	26101.7	228602	172049	170052	634413	38999.9	48167.5	50051	155081	121641	90417.8	177907	58383.4	46806.9	38239.9	41951.8	39237	41930.1	65087.9	246694	9.49981e+06	2.04781e+06	214261	129950	88521.6	66790.1
337_A	23507.8	18578	20860.2	9340.77	7261.1	6912.9	13101.6	12499.4	20831.6	30040.8	34931.5	35968.6	27532.7	30285.6	91477	98309.4	30491	24662.9	27877.4	46760.5	45677.4	36246.3	77032	48627.8	222452	181954	159424	713749	73173.1	63677.3	55346.2	149890	151689	95089.4	209496	76643.9	75094.6	61860.6	60345.6	60200.4	68980.3	100070	294533	1.0885e+07	2.63189e+06	237973	142467	129233	92615.3
337_B	9290.08	2652.37	11196.9	1631.54	2337.14	5376.39	9745.4	11636.6	9878.8	5440.71	11280.8	21558.3	22606.8	19931.7	73481.3	94038.6	7685.84	6586.23	4888.19	33048	32631.3	35724.5	67136.5	33032.9	228968	225887	147312	789486	55743.8	62622.6	61303.1	140892	138580	94795.1	209178	58791.3	52705.8	37449.9	48863.3	30373.7	52203.4	100236	287547	9.55496e+06	3.31509e+06	246541	131896	122710	68398.2
337_C	7358.19	-12156.1	6324.19	-93.177	5408.51	-1436.58	5854.06	8132.39	9104.21	7842.51	11456.8	18921.5	10860.6	16692.4	87047	85244.1	30217.4	10125.3	10853.3	23790.1	13597.4	20875.3	58853.9	41908.4	220603	228874	163537	914319	68826.8	36514.1	59672	141635	142170	94493.7	233092	74770.5	47584.8	51996.7	51301.5	42981.9	59226.1	86455	280310	1.03909e+07	3.39952e+06	242963	142562	103430	64932.3
337_D	2397.1	7389.37	14139.7	3243.68	1286.41	-13567.9	8792.97	15202.8	8269.69	15715.9	23287.5	15079.5	9776.38	19079.1	56759.2	89417.3	26167.7	15355.2	32104.2	28713.8	33860.1	24298.9	76706.4	29506.2	226525	140234	158371	603099	56502.6	55922.2	56450.6	134806	126963	84825.5	186993	79590.7	78049.7	43524.5	41058.2	52240.3	59159.2	80721.8	243782	9.63374e+06	2.02832e+06	221551	116152	96077.8	69162.5
337_E	17521.8	-1416.77	498.751	10157.6	4870.74	-1301.1	3931.54	5984.2	11497.4	723.545	3053.61	13323.8	-5189.74	22126.6	61821.6	87953.1	25301.3	18345.8	13271.6	20341.4	7571.47	21567.7	50130.9	19077.8	229808	141145	193621	713284	47267.5	48051.1	57970.1	156032	121974	78982	189018	47572	47683.8	36836.1	31504.4	38295.2	47170.3	75652	254385	9.5311e+06	2.31443e+06	216627	101386	83498	52662.9
338_A	31930.1	23793	15453.1	21394.6	24387.2	23302.3	19586.8	6037.44	38305.1	19216.5	23082.6	33631.7	31424.2	26104.9	86178	106379	51658.4	29771.4	38429.7	48484.3	54408	50511.3	72947.2	49688.2	254160	275977	206917	1.15635e+06	85930.5	65497	72263.8	153711	178831	104947	244259	84058.6	84192.9	53247	65948.9	61682.3	69363.3	114728	300857	1.03327e+07	3.4372e+06	282071	160893	135144	89983.7
338_B	-2197.62	1857.99	902.204	22063.8	7303.1	5547.82	392.916	21153.6	14945.8	18414.1	22861.2	20051.6	10121.1	2038.54	73984	91908.4	23699.8	11099.2	21483.1	31813.6	31601.6	28504.3	70050.3	18663	255651	217770	208924	972496	61587.6	64184.8	46610.6	138638	129301	81672.8	208842	71799.5	73475.9	44961.8	52617.1	46778	62573.9	95750.2	256576	1.00902e+07	2.82705e+06	245278	129420	117138	67495.6
338_C	26716.9	32133	16112.8	19689.6	29069.1	10941	25024	6263.47	33172.6	22194.1	20433.5	47327	21785	33586.4	99764.3	115458	37901.9	28419.1	29431	52196	43098.3	56440.1	83565.9	57726.5	279922	224731	226156	944623	73467	72058.5	84550.1	155531	136327	110943	218666	88831.3	77553	59294	60744.4	85431.2	85456.7	104444	308389	1.01029e+07	2.27008e+06	226347	140345	104113	77589.2
338_D	40482.8	22906	33474.3	25880.3	36497.2	34485.1	36774.1	37436.9	30593	35105.2	29858.9	37849.2	38820.2	47151.4	107108	111544	42069.4	35552.7	48900.5	51024.5	58276	53241	89004.8	66526.4	272851	234737	229680	1.00946e+06	88113.5	85490	93192.5	175298	149915	134872	245956	89148.2	101316	79518.8	75991	75518.1	94714.5	133725	329915	1.10818e+07	2.85543e+06	271736	167852	134631	97407.2
338_E	16463.7	20905.9	7553.61	-569.254	8982.64	3792.15	18498.4	14262.6	18748.6	25244.1	30714	37318.2	25360.2	16359.8	72825.5	84086.6	28520.4	15729	20683.9	26139.8	28315.4	40206.9	53301	66541.4	196405	252347	181319	1.10226e+06	84152.3	65877.2	85337.9	126988	168868	111407	223154	87669.9	67857.2	67469.7	73308.6	50047.3	72785.1	92024.2	299469	1.13362e+07	3.18194e+06	288231	169038	138339	76074.6
339_A	2686.33	2351.58	23561.4	25052.8	8359.98	6631.69	4470.99	18185.2	9840.2	18727.1	8294.15	17660	19344.4	24426.4	79061.4	86589.3	40785.7	35790.5	17423.1	32476.9	39999.1	25406	66081.2	39343.5	262199	225215	189376	893122	60720.2	57708.8	56754.1	153735	145810	91533.2	225053	70942.8	74989	54855.8	41126	47421.5	45884.1	79929.5	300210	1.04066e+07	2.51385e+06	263936	134835	106684	79286
339_B	-14270.6	-5995.4	7235.95	4728.56	-4194.08	-3362	-2581.63	2342.4	7018.43	7399.83	3031.34	6381.72	10116.3	15535.8	60723.4	85253.7	28657.9	17068.8	-2439.14	22576.3	18991.2	25438.5	64594.7	39530.1	216167	237002	159668	856497	46359.5	44750.5	49203.6	145456	131795	69812.3	201767	71099.4	39154.8	50843.3	40061	30762.5	38537.6	82303.9	279459	1.09708e+07	3.26013e+06	283885	150646	114208	73422.4
339_C	22347	18587.9	20798.8	18240	14134.1	20417.7	20706.7	16145.3	13203.4	16333.2	15219.1	26189.3	35628	43890.8	67897.3	104063	35828.3	15699.8	18465.7	39255	45626.5	46767.1	94379.6	50532.2	318965	226922	236615	898686	76896.9	78126	77893.5	171231	151142	108973	242987	88446.1	82064	51120.9	68727.4	71893.7	72224.3	110718	333484	1.09085e+07	2.14494e+06	235899	143882	111251	92428
339_D	-7093.99	-29715.2	-14778.5	-7716.73	-4062.15	-7326	-8566.45	19479	-3666.15	-14945.8	-3311.44	2602.37	-302.283	-8552.76	67388.7	85733.7	17512.3	3571.83	-1977.9	26163.2	20418	29508.5	72025	9116.89	284705	192069	206229	1.06128e+06	37123.6	44422.9	47110.1	140797	100091	71787.5	204807	36311.6	27288.8	25369.2	23030.4	6557.15	16014.5	60559.9	243073	1.12358e+07	2.82031e+06	244324	134571	95406.2	43453.1
339_E	14710.5	21057.7	18814.1	4007.51	-10126.8	2644.1	13409.1	15563.4	18376.5	25294.2	14118.2	4701.46	18633.1	10511.4	76438.8	102603	34736.3	12422.1	18697.6	35627.6	38109.4	32543.7	78527.1	40529.3	254156	225444	191584	884908	57348.8	64878.2	65574.6	151017	143639	98602.8	221134	68317.2	84407.3	56791.1	63578.7	50815.2	73620.3	95457.1	312498	1.12052e+07	2.67494e+06	266057	151077	111145	80733.1
340_A	8628.11	14422.5	7787.85	-877.348	3776.21	6980.41	-736.425	18089.2	26900.1	13847.6	-4461.98	17170.1	4800.68	26679.3	108408	94609	25005.2	30619.2	22109.4	25748.8	34507.2	20479.4	73130.2	40916.8	290245	256686	237929	1.05089e+06	74473	51081.7	54448.8	149880	147004	96939.7	246622	78437.2	66110.6	56830.4	51443.6	44555.7	43314.7	79686.5	294126	1.10086e+07	2.72034e+06	278668	141078	116190	78351.9
340_B	-6134.28	-4240.94	2461.68	-9350.45	-5562.52	-4954.55	7101.07	9963.06	7877.69	7165.31	7788.89	-52.064	7866.34	10960.9	79822.2	93298.5	15290.9	12456.8	15850.2	33990.1	24999.2	32036.9	72378.9	29327.6	253159	169475	212875	968263	38685.4	67773.3	46353.6	122943	111387	77260.9	181137	47288.5	59888.4	45679.2	30354.3	41448.9	42691.6	81435.7	249743	1.01595e+07	2.78093e+06	220599	116537	90042.6	59087.9
340_C	8279.16	3173.2	2766	6601.63	1997.37	3606.22	455.655	26481.3	20787.8	11485.8	3644.52	20591.2	11568.8	20537.3	98514.5	130173	36932.5	11717.2	15652.7	38501.3	39381.1	37494.8	80011.8	42584.6	277863	282143	219524	1.14999e+06	73710	64311	81207.1	152359	160405	109285	235855	70729.7	81091.5	49866.8	51474	58675.7	61395.2	87349.3	281759	1.034e+07	3.20567e+06	265709	148416	116432	72984.6
340_D	3103.66	-1932.74	-13278.3	386.002	7570.38	8182.1	2664.17	3743.27	8215.07	10301	15996.7	20862.7	10481.6	24451.5	86073.5	103281	19453.5	2264.35	14229.2	42809.9	28584.5	17886.4	64012	47343.7	212991	233758	160338	964632	63856.9	52799.3	52794.5	121910	162206	82254.8	211077	55278.1	54822.7	53652.4	34764.1	47506.1	42664.4	74745.6	266959	1.04836e+07	3.10866e+06	295375	151740	115228	78735.7
340_E	18791.9	12975.3	10338.7	13514.9	392.593	11769.5	10726.9	7607.81	15869.5	7402.41	6915.06	11152.9	5202.8	25947.6	94993.9	95891.9	30264.7	15462.4	23309	44940.3	43846.5	29610	64241.8	22406	239967	213150	212448	959397	90604.7	65997.6	68332.9	127825	146119	94702.8	210790	82738.3	72285.7	55679	72905.1	54065.3	54617.5	92517.5	291803	1.03828e+07	2.78789e+06	291046	154771	111651	84339.2
341_A	23701.7	7792.72	9590.22	8266.64	1342.93	1228.72	9774.14	7620.49	22797.3	16557	9147.15	16458.7	16900.6	20987.4	91581.9	106906	48749.9	13349.6	28168.3	26866.6	35984	32366.4	61437.3	36904.4	300677	176327	259786	714834	52291.3	61646.9	69409.7	170562	110278	114450	190889	67115.8	66239.8	41144.7	42663.4	37128.2	57781.5	84946.7	346496	1.10595e+07	1.66225e+06	224214	115618	118119	67924.5
341_B	32925.4	31133.1	27642.7	24892.8	16619.3	30940.6	27980.8	35136.1	34878.5	24529.3	31985	33975.9	17681.7	41583.3	108752	127944	39833.3	47435.4	29114.8	56192.2	61316.3	57340.2	97034.9	69249.4	324314	287961	237677	1.096e+06	88809.5	91389	89085	173817	180128	124938	257945	83131	97368.2	88547.9	77664.1	86890.8	92286.1	132675	354760	1.12037e+07	2.53857e+06	265961	160338	140014	89381.7
341_C	-2270.33	16453.1	13633	926.319	6145.31	13526.9	-3524.9	13210.9	-4730.08	3360.59	-7399.56	17450.5	2659.29	30903.4	71199.9	97897.4	36080.7	11468.8	-300.7	17256.1	29788.5	16261.1	77733.5	40065.9	280600	194228	234384	837692	63677.6	44839.3	50738.5	162431	128470	102667	206153	46294	47295.6	47640.3	29677	38557.2	53067.8	88519.3	287034	1.08575e+07	2.14666e+06	226792	128725	104051	71011.9
341_D	8524.91	15461.3	28880.4	702.949	4030.46	23523.8	18331	22374.7	17983.2	11944.8	19999.4	37466.8	16281.9	17099.8	91289.9	102479	34447.5	24656	31960.8	43759.6	25705.6	43657.1	92816.5	47613.9	309099	201642	265525	892207	54010	69196.7	69794.2	180820	135308	111186	216164	72410.9	60366.4	51907.7	50933.8	59036.9	70459.1	110042	345517	1.08441e+07	1.81475e+06	238129	139979	102995	67266.8
341_E	11052.1	12680.3	11839.1	7303.33	-2690.94	3873.7	5509.39	-648.222	12624.1	17525.9	4955.6	13076.9	20430.1	20339.2	94057.5	106078	30347.4	18123.8	10144	38909	44109	44212.8	81977	37380.4	298666	244419	247735	1.04814e+06	69872.6	78780.7	58524.4	153006	125579	106543	208955	67542.7	66817.5	54100.6	55968.9	51551.9	39773.2	88860.9	310633	1.06345e+07	2.56182e+06	282760	144846	92777.4	69482.2
342_A	21571.5	27719.6	17395.6	17467.5	32358.1	13059.6	10094	27040.1	18642.7	25486.7	6466.34	24688.4	4989.58	20647.7	74353	96478.1	32492	19318.8	23212.2	51142.2	55165.9	42582.4	85094.7	41821	222181	204604	154833	675391	74190.8	77468.9	67838.9	163562	144563	88208.6	213114	75416.9	71904.4	65311.7	56783	66412.7	80320.9	89176	299117	1.04663e+07	3.07681e+06	274534	143244	109541	63812.4
342_B	12877.9	-1129.53	-946.23	11549.9	-1574.24	18302.3	15080	7174.78	20057.7	15817.5	11416.7	30866	15584.8	25061.6	85563.4	97047.5	33658.5	20927.5	12511.4	21420.6	22222.1	30322.9	85167.6	40965.7	225088	276735	155769	960523	67819.4	44155.1	53772.9	135895	155187	89517.5	214566	66127.5	68252	51393.7	45930.8	47580.7	61250	84282	269322	1.03948e+07	4.79569e+06	302279	155461	132037	85011.4
342_C	28203.6	29568.4	22825.5	15294.8	18397.4	28646.5	26282.8	36758.1	41137.5	34214.1	31486.6	24434.3	45786.7	31674.9	101432	101304	43859.7	35131.7	20387.6	54562.3	55519.3	56494.3	70939.6	70231.9	216511	241483	154302	679952	79859.3	79066	77652.4	155993	199360	116212	225147	100056	84261.6	79971.8	58328.1	81296.5	89449.6	124110	321762	1.08063e+07	3.64445e+06	284326	166823	125377	95753.4
342_D	8089.06	3460.65	427.247	7374.71	4226.09	14916.2	10001.1	18792.4	14086.6	18305.4	29932.9	22640.5	25758	14046	80171.5	93959.2	37538.5	15260.5	17031.5	20243.7	50935.6	30053.9	82668.4	43230.7	216661	251236	162211	918491	77403.2	64274.4	59225.8	138223	155925	97961.2	218136	71985.5	79118.8	60827.9	55195.7	47265.8	65820.9	104819	287901	1.05424e+07	4.67578e+06	327003	156583	128139	90208.7
342_E	10544.9	9549.87	27155.7	4295.53	14008.4	12083.9	-1561.41	7231.47	13046.3	16342	10541.7	22285.4	9999.47	19139.9	78840.2	89736.1	30611.5	25250.5	20279.4	51655.2	40836.7	27717.4	62261.4	33372.3	194235	193190	138733	695561	55724.9	67773.3	73287.3	143145	136060	82313.1	202757	81473.2	64917.4	53463.2	65521.5	54566.3	56280.7	93671.6	297153	1.06537e+07	3.58945e+06	268668	139158	129141	91568.8
343_A	3301.16	6554.04	8047.74	1213.03	6435.12	863.988	9362.59	5744.95	2695.05	-4239.04	4686.12	2074.99	16512.7	13352.9	70203.3	88938.1	24726.3	10535.8	9145.97	24149.3	29420.2	32131.2	50261.6	15948.6	210708	160186	164726	682177	51150.2	59864.5	41999.5	144259	142568	79629.5	206008	48360.9	41836.8	39304.2	33818.4	38912.3	48468.5	72779.8	269647	1.02327e+07	2.40961e+06	245035	109881	90784.1	54004.3
343_B	10892.7	15304.8	10478.6	4771.94	22010.7	7102.12	15381.1	10460.7	12856.3	4103.21	17321.1	28456.4	18660.1	20108.6	80251.5	97342	28515.3	12439.9	27582.8	39904.1	33630.9	21078.2	64542	33533.2	219527	176773	146482	754076	50977.7	54147.9	50944	150629	150900	93250.4	188192	47673.3	58583.5	62951.9	46272.3	40185.4	48063.5	86815.9	262687	10585698	3.64063e+06	289651	153858	114265	81682.9
343_C	16803.8	23459.1	16111.6	3632.37	11361.9	-1160.64	17883.7	18226.3	22174.7	9650.9	13552.5	38779.2	17529	22499.6	94575.5	111754	44200.4	30674.1	21398.3	49705.2	44719.2	38560.4	81434.4	46707.7	234982	194027	170841	631674	73004.5	74928.9	79200.5	174392	161014	101341	222426	85258.2	90982.3	68308.5	63188.6	51106.2	64434.9	112245	342290	1.10586e+07	3.33935e+06	275344	170267	141438	96139.8
343_D	-8553.17	8701.6	5594.63	9006.74	-2725.46	6781.89	9086.89	2599.81	4905.87	16187.1	-4450.83	9969.53	4987.24	13636	63178.9	81232.6	18889.4	6635.1	9174.77	18753	25857.9	28385.3	50399.4	20312.7	202772	162437	170904	624566	49078	55757.8	34814.8	143738	115840	81768.8	189919	52959.2	39443.4	28683	32155.2	32540.9	28339.3	69607	251016	1.0548e+07	2.26312e+06	238273	120578	91687.8	57842.6
343_E	12229.6	1010.85	3581.3	12115.8	9547.4	-8835.61	6464.84	8504.9	19137	7354.67	14974.1	9564.88	21153.7	27804.1	96255.9	103519	39121.7	18038.4	15744.1	23701.7	30426.1	18340.1	65556.7	46658.1	180828	241275	124798	782430	53134.2	56485.8	60780.5	121215	163375	102029	221281	66168.9	68906.1	53989.6	43537.2	39265.1	56421.6	76100.9	255333	1.0769e+07	4.42849e+06	313895	158942	120121	88376.1
344_A	-1852.6	-9497.12	-12261.9	5072.5	-598.959	10464.7	7377.89	2508.29	1588.59	7406.93	14366	1794.17	19239.6	9957.78	100156	98108.9	30006.2	6081.39	15292.5	31056.6	32776.7	46592	47287.4	33330.9	234828	216338	156556	831850	55909.9	58986.2	61174.5	148794	151402	88459.7	223998	57138.1	49593.3	40939.8	47340.3	40185.7	47799.7	102790	294603	1.16976e+07	3.55003e+06	310021	158715	122504	85283.8
344_B	272.346	4946.79	9844.44	4808.13	-19743.8	776.91	-3699.42	7235.94	9268.58	10537.2	-9226.95	724.409	12650.9	16928.3	74003.7	90995.2	24445.8	14362.7	1346.24	28541	25015.4	33048.5	55305.5	28600.4	243151	191434	173730	784110	52079.5	43019.9	43761	136305	127542	94255.8	210158	48449.8	48028.5	44864.9	56051.5	26234.8	46447.2	88144.8	322123	1.1336e+07	2.72042e+06	258689	145579	112298	52558.2
344_C	187.878	-5636.09	-2400.74	7633.88	11643.1	-6496.9	-4874.73	11253	12947.8	8899.63	13427.9	13378.9	19769.3	30723.4	106912	94981.1	30250.6	29988	12644.9	29411.7	35208.1	29979.4	86217.7	49649.8	249366	283951	174217	893891	74857	61702.4	58948.4	140903	174383	99437.9	215961	80918.9	62779.7	48741.4	56226.8	44709.1	64286.2	101170	318396	1.08055e+07	4.278e+06	307694	169488	119968	77405.2
344_D	2653.5	-9042	3784.72	67.686	-607.45	14046.7	1298.05	11131.8	660.048	23537.7	6849.48	13322.4	-1232.91	29039	94350.8	91505.2	25332.9	16102.6	3536.49	25798.5	24707.1	30470.7	80356.6	35397.1	214149	314465	164177	1.16303e+06	86882.1	59248.7	44012.7	141073	168567	96801.7	226926	80659	61230.7	49335.7	42742.4	47210.3	52453.8	97803	269910	1.03814e+07	5.4862e+06	342007	178611	140956	75452
344_E	-927.397	-4210.02	-5435.49	391.143	-5806	-12516.4	11630.1	25037.2	2132.93	10238.3	17380.9	25119.5	29657.2	14851.1	92939.7	88749.1	25492.1	17174.1	9440.31	21856.3	42995.4	35792.7	81116.3	45199.2	216615	219530	142453	819872	67914.9	51348.2	60697.6	137882	158072	99370.7	223155	71717	50893.3	48143.8	54367.9	46071.3	52158.3	95612.8	250744	1.07794e+07	3.61564e+06	300071	148753	119072	79443.7
345_A	21457.5	21233.1	18816.6	5868.92	9467.52	7657.71	24335.7	6647.45	14043.1	12065.2	14433.7	10670.9	16352.4	11930.9	90710.9	83803.8	28397.6	15243.6	29199.6	40426.4	46731.4	33183.5	67680	38795	181796	189235	149771	711849	71972.5	59025.2	46747.7	141548	160151	94007.3	222178	65753.1	77606.8	69440.9	55304.8	57899.6	84568.9	107590	334036	1.20026e+07	4.10267e+06	311588	159097	129921	103014
345_B	21825	-3834.21	11263.4	15558.1	15742.2	16116.8	6595.73	13401	22607.3	23977.6	15672.9	16371.4	29613.1	7310.1	88325.3	98640.7	45320	12460	29287.7	37512.4	36877.9	26702.5	73254.1	47336.5	181521	236692	137994	718889	66501.3	53802	60204.3	156056	180601	104284	232516	86973.9	74010.7	63869	62840.7	54084.9	73874.7	111104	315275	1.17449e+07	4.33447e+06	304880	164215	132326	99819.5
345_C	13648.2	18350.2	7557.76	16443.4	21100.4	-10441.3	5706.1	18767.6	20482.5	23712.5	28550.7	15102.5	14133.6	20780.9	98313.1	113452	26763.8	17689.2	11106.2	35466.5	37742.2	35748.4	86608.6	55163.3	208965	241624	151371	848693	63041.9	76073.1	67280.5	135114	167622	103802	241385	70119.3	74865.3	49331	49272.5	48640.6	74065.8	99681.8	294771	1.09451e+07	4.15256e+06	300789	163702	123798	70320.2
345_D	19838.4	25622.6	31001.8	21213.6	22947	28416	38644.4	40857.3	28897.4	41787.4	33123.4	28731.7	46386.3	46077.9	125003	128762	59749.7	32037.7	48681.7	52775.6	48773	48800.2	88600.6	69623.1	203894	352140	151893	1.01741e+06	99401.6	85413.5	76621.4	151602	231630	106952	271223	122114	101418	88865.5	99783.9	91684.4	88797.4	147649	326133	9.75778e+06	6.58969e+06	398753	215376	143209	103791
345_E	14304.7	23232.5	23879.6	15074.5	30193.7	18583.1	33412.9	30084.6	25835.4	22568.2	21096.8	30889.7	26892.3	52871.9	104145	115347	46101.4	26613.6	27654	40402.2	63170.6	57424.3	99295.2	74361.6	220531	279747	139875	868259	101411	86671.4	81103.6	159691	189853	118005	248936	93509.8	76114.2	89660.3	81405.7	72039.6	86385.4	124152	284151	1.0293e+07	4.87733e+06	330963	185347	140777	103926
346_A	11738.5	9343.14	994.138	674.383	4730.5	11137.6	25012.4	29862.5	20453.6	14430.2	16499.5	32504.6	37036.1	17779.9	84610.5	87606.4	34188.2	38791.4	27680.5	34633.1	24280.8	49260.4	65207.6	49519	227552	222615	162979	832091	68820.4	58588.2	62102.9	150716	150787	102646	235612	70664.4	74158.5	64102.2	60577.1	56940	78121.5	95242.6	272169	1.00493e+07	3.24266e+06	234816	153355	129358	63613.8
346_B	15232.2	11588.8	24276.3	7964.86	13060.4	-3296.01	12472.1	8434.98	15538.5	19688.8	27656	21783	21179.2	33024.3	103351	111418	38493.2	32313.3	23107.1	40029.9	34978.8	35317.5	61794	36721.5	198305	261985	155972	930681	67595.2	78610	62892.2	145829	189425	100904	265433	72443.5	71699.4	57561.5	73492.7	71177.3	67760.6	104991	290902	1.04032e+07	3.91706e+06	289682	165259	125640	87368.1
346_C	9307.17	26871.1	12585.2	24844	8699.78	-5648.62	774.241	5811.38	34857.7	37419.5	19664.8	27149.1	19147.3	36533.5	115918	125563	46301	26857.3	28159.5	41140.3	33671.8	19629.6	48253	74920.4	209458	313051	138558	918745	73029.1	64065.1	77148.7	153401	189388	112793	279715	81679.8	75023.3	69547.4	68213.3	71464.9	87305.2	120092	313795	1.05656e+07	3.84575e+06	296615	172009	131601	96451.8
346_D	8339.25	-4919.75	17278.1	16803.1	10462.3	12233.3	913.743	2507.97	16143.3	-278.033	10737.8	10785.7	9096.85	17416.9	88036.5	97643.3	26968.9	29598.5	12439	40917.5	35861.7	30120	57469.1	37563.1	239987	244691	159922	904536	71631.9	59481.5	62232.1	147513	168097	100948	242476	74196	67930.9	53839.3	63013.3	60104.4	69750	99938.4	271400	1.10279e+07	3.38708e+06	283397	146363	123712	92783.1
346_E	15552.7	15235.5	-1376.82	-5938.22	-7841.73	-1285.67	7918.6	13691.8	10737.6	7613.73	6812.72	9187.91	13390.2	7049.95	71091.3	82500.1	35745.4	7990.08	4819.34	16734.6	33354.9	25015.3	43097.2	11347.1	233096	167455	138219	686726	41067.4	53933	55099.8	145869	127273	100794	206872	49643.3	48588.1	46851.6	41878.3	33407.6	44053.8	58816.1	239952	9.91149e+06	2.27231e+06	237341	126001	100733	60779.7
347_A	7155.58	15502.5	6598.14	9717.18	10373.1	760.192	7158.17	10566.3	22637.5	3445.8	6781.97	20109.8	13568.2	33125.6	80212.2	87841.9	32731.2	20732.9	21809.6	24048.6	28376.2	28562.6	70428.4	48373.2	202409	228162	144686	849350	63082	66942	55818	138770	133589	81508.2	220932	69536.1	53299.5	53789.5	74156.2	55451.5	58631.1	85322.4	241830	8.95698e+06	3.66673e+06	280116	134043	106646	81457.7
347_B	18183.1	15828.5	10294.5	14158.5	15765.1	32684.6	22793.8	17875.2	22735.2	-392.403	16418.9	9777.81	25148.3	27739.3	85281.9	104627	48096.8	34599.8	27229.7	45763	43255	45066.9	46917.1	41893.2	242012	224857	158736	844670	80902.6	58059.5	54746.5	142414	152434	109305	241605	80970.8	77161.6	56692.2	62040.7	49909.5	58086.5	106755	251845	9.55602e+06	3.10183e+06	269542	141824	109147	76040.7
347_C	-5444.51	10131.5	-3976.56	-14145.4	1354.73	-568.025	10717.6	-4865.87	392.615	8845.64	25599.1	7209.49	6927.26	8731.9	64170.3	76982.6	20122.4	12612.2	12621.9	39135.5	10291.5	6189.56	53187.7	26219.8	191477	146788	176396	709527	59688.9	59569.2	45211.4	132249	106173	75564.2	189101	42063.7	48742.6	38492.2	55529.6	41231.8	40390.1	70225.3	254874	9.88341e+06	2.69785e+06	223073	125184	101216	79778.5
347_D	-22942	-17880.1	9218.43	4123.02	1026.02	-1667.07	2713.72	1064.45	-799.705	-6669.7	9053.94	2801.87	4121.45	-12562.8	60296.9	61397.8	12078.8	-4551.56	2003.19	3137.97	17672.3	10528.2	38031.4	25609.7	184521	192106	119039	733283	45994.6	27915.1	45277.9	113206	127527	67900.5	197287	51459.4	38393.1	39763.2	33631.6	24744.9	32360.8	64451	229178	9.53387e+06	2.94905e+06	243462	118635	97182.2	57970
347_E	32633	10893.1	19613.4	15660.2	10904.2	13447.4	8669.29	3291.82	14705.5	15507.2	22208.3	22511.8	16777.3	32328.3	87552.8	107444	35241.7	24946.5	24633	46078.3	40484.9	40181.1	64195.5	28045	212865	222939	146611	816416	64520.1	67298.4	66756.8	138940	173776	95502.7	225719	86341.2	82333.9	62962.4	55434.3	64812.8	61803.9	108119	315914	1.06758e+07	3.47025e+06	304447	162452	136350	85551.2
348_A	-13190.7	-9326.08	-17094.7	-7124.36	-7157.08	-8431.68	-23938.4	-20769.2	-18102.9	-4151.02	-9555.21	-11054.4	-7887.33	1186.84	55178.4	68129.3	10241.4	8392.24	-13610.9	-7560.11	6645.39	9205.09	38528	6155.31	180527	145148	133834	673586	38127.6	19076.7	43520	118818	108130	54793.9	172373	36473.9	32545.4	21121.5	20938.3	9621.77	33860.6	51849.5	219751	1.00374e+07	2.46129e+06	232447	110599	82197	47795.4
348_B	21188.8	16421.4	29497	26363.5	18090.6	13696.3	24050.6	21719.3	28845.9	26643.4	24824.6	20124.5	33833.8	37612.8	113397	119835	48472.9	31121.2	24341.3	50349.7	58979.7	54044.5	76262.3	66265.6	197552	250330	145413	772199	71506.1	78236.1	83292	160122	207409	93409.5	262395	100921	74741.9	80381.9	66657.3	76172.1	81283.2	128105	326570	1.06962e+07	3.74809e+06	295448	165954	133094	94398.7
348_C	11172	3886.01	71.6648	1795.51	7864.89	4406.08	6215.98	9885.38	9812.61	-4719.63	13967	18534.9	17195.8	18369.2	80329	81595.1	34860.8	22714.3	28557.7	27401.6	33173	33629.8	69249.8	31667.1	282500	184925	237671	759404	50963.1	47569.8	73862.9	161674	111667	99936.3	213923	54231.5	56349.9	43785.2	39674.2	44033.4	46950	85456.3	247528	9.07096e+06	2.10844e+06	206225	121836	92808.3	66160
348_D	8889.29	8852.82	16214.7	15609.3	-991.436	10085.6	10353.8	10331.7	17516.4	11313.9	22497	28548.4	13396.1	17391.6	75524	98301.2	37214.2	13850.8	19941.2	39295.4	42497.5	34777.3	55147.1	47967.9	198993	206008	144994	751955	48539.8	69573.7	80369.9	141794	145083	97103.8	220536	83107.8	81035.6	49868.1	56370	63495.8	67718.2	89762	288119	1.02101e+07	2.69559e+06	254277	148408	107994	71913.9
348_E	13984.6	17183.4	16084.6	124.59	15844.4	5207.88	6171.22	1778.17	9150.73	22456.3	6827.18	31334.9	26630.7	31670.8	97837.6	98231.2	21455.6	34055.4	9758.67	46166.1	45036.9	31365.8	74116.2	50378.1	219863	279429	144383	885515	61261.6	66205.3	80046.8	147962	174417	107346	250357	87793.9	77482	75658.9	46720	64918.9	73268.6	104606	292712	1.06397e+07	3.1695e+06	273304	161336	118760	84223.4
349_A	25448	11211.6	1099.86	13719	21193.7	5507.8	12631.4	14071.6	15863.7	3927.46	7418.24	23246.7	9457	21946.5	79384.6	82066.2	25356.1	29452.5	22017.3	28768.5	18835.9	38339.4	76248.7	21555	255814	222592	186389	873974	56961.8	58635.8	52113.7	148861	139923	89427.7	217523	77640.2	71413.7	45939.6	51847.5	61552.7	71886.8	78365	262865	1.00058e+07	2.89207e+06	237801	135547	121032	77544.5
349_B	3181.61	2401.38	1801.39	-4754.4	12802.4	12925.6	-7208.97	-13695.1	-3378.47	10727.2	-13475.7	-4465.04	-12424.4	8268.02	40958.4	70232.9	1520.53	1403.14	-3362.85	7531.56	5825.59	4254.25	35203.9	8342.31	181987	153972	120465	650807	39951.9	28360.9	40042.5	123539	132821	80049.7	194305	57101.6	28110	31333.5	35844.3	27765.6	33740.1	75673.9	214693	9.67196e+06	2.63037e+06	231793	130612	98272.2	58330.7
349_C	-8465.64	-9250.29	-8648.81	-5351.65	-9134.28	5301.88	10699	4616.4	1714.74	9129.67	-1721.19	8629.35	13680.3	13076.5	76371.1	75286.8	21408.6	-3547.47	6768.45	34951.7	16310.4	8588.67	45444.3	9091.28	203425	191266	127762	783581	46438.7	47467.3	43146.6	132472	139230	88594.4	212355	50340.4	53927.4	50782.5	44942.7	28737.2	39612.1	62097.8	251028	1.02205e+07	2.99519e+06	284478	150853	107641	58340.2
349_D	13943.4	24377.4	14168.3	22702.6	19952.9	10827.2	11126.5	16313.4	19192.4	25569.4	12214.6	11473.7	15377.4	28411.7	95638.2	111934	32054.8	35053.4	26202.7	51305.7	45008.2	25597.8	68199.6	62936.8	222083	251576	160908	912867	79178.9	64781	62705.5	155468	165627	103192	246276	77454.5	70762.1	60077.4	68372.4	63140.3	70484.5	86706.9	243459	1.01056e+07	3.37071e+06	273432	145235	114731	79348.6
349_E	11760.5	15875.6	24876.8	9898.95	19172	17224.8	14046.9	26932.3	22186.8	13119.9	17021.7	23472.3	18134.2	27637.1	86298.6	87629.3	35370.6	36874.6	28490	42764.5	41171.8	42127.9	82732.1	43476.6	229698	181648	175003	690172	62200.9	78052.2	77172.6	158465	155333	120809	217021	89353.6	80365.5	64656.1	70737	58448.2	69195.7	116842	296137	9.66037e+06	2.34653e+06	231295	131323	122847	79963
350_A	2058.1	-1199.92	-2266.24	23574.9	-3170.25	11571.5	12990.7	6527.24	27726.9	16836.1	21900	14819.7	3248.06	8111.75	68497.1	85133.4	23645.1	28837.6	11331.6	24163.5	25290.2	33409.7	63671.4	34548.2	298721	198874	245367	1.02567e+06	57090.7	47874.9	65484.4	179532	120178	101173	218909	58463.2	74470.9	32307.9	48144.5	38882	40715.6	87250.3	254620	1.02807e+07	2.39239e+06	230429	115825	108483	68338.9
350_B	5679.14	7110.6	5956.89	4458.59	4165.84	16947.6	20066.9	14522.6	8013.88	15253.9	7858.91	7934.95	5711.08	12711.2	73860.4	81864.4	24215	27278.2	7258.49	26171.1	22813.9	27621.5	61507.1	30605.6	237563	179788	217709	899882	62897.4	54422.9	43158.3	151553	118367	93600.5	202571	62341.2	73361.8	46875.1	44178.1	45747.6	42975.1	89603.1	314832	1.21103e+07	2.73469e+06	308082	157454	118275	77943.5
350_C	-12829.2	1377.92	12177.8	4072.94	11074.4	2423.61	12369.4	6558.24	18874.7	12899.8	5289.3	22585.5	3200.52	14598	71844.6	85546.8	29658.1	15435.2	15036.4	33757.9	31042.5	36113.7	66769.8	34049.2	254471	153069	245948	762172	69640.1	41029.7	52277.3	158029	107035	101476	210297	57113.3	73085.3	55978.7	40757.4	53366.8	49778.8	81159.4	284325	1.09668e+07	1.87567e+06	211738	129721	95915.3	70554.4
350_D	-1472.89	12273.9	2134.74	-1866.02	12568.9	2742.81	6776.43	12680.5	9447.79	-5977.4	9413.38	-2304.61	14548.9	14208.2	62982.5	93895.6	17718.5	4411.72	7087.58	16027.4	16244.2	51237.9	62401	21469.1	269051	125273	352705	773703	56448.2	80094.8	57210.4	139640	95329.8	91204.7	184455	48066.3	55195.2	31076.5	33673.3	32449	25159.4	68383.6	274102	1.02999e+07	1.60443e+06	190717	109501	96762	59555.1
350_E	8410.34	18501	13741.4	1462.58	5229.54	6006.51	3583.59	6593.38	21384.5	19207.9	26904.6	27365.5	22459	30104.5	83046.3	111826	24558.6	35661.9	29807.1	28712.4	17506	34587.2	88680.8	39084.6	338463	236689	289309	1.24306e+06	76539	67145.7	80456.2	176948	115463	117325	231123	81850.2	78849.1	41371.5	69055	57519.7	74233.1	97642.7	293464	1.18564e+07	2.44105e+06	255582	147595	129393	90963.4
351_A	14765.6	13050.7	18549.3	18118.4	15977.4	29717.4	21928	7463.62	15716.1	18519.3	18976.5	22078.4	29951.3	30591.8	84428.9	101575	38843.7	16728.6	20793.9	37133.5	45675.6	39408.5	80641.9	48454	236395	247893	208756	1.02916e+06	67262.1	62381.1	82497.1	152910	166255	112099	245868	81118.1	78908.5	77375.7	74625.7	68526.5	71896.7	111620	314508	1.06903e+07	2.8483e+06	271001	145314	118078	93455.7
351_B	15635.8	11290.3	1956.65	16035.6	10821	5906.8	18393.1	10049.2	11409.8	13914.6	11607.5	16518.6	7864	27893.6	85208.2	96210.1	44260	15395.2	22003.1	29354.4	35113.6	50679.9	71577.7	44350.7	255496	224649	205834	1.06243e+06	76691.1	56955.9	72154.6	159807	143830	99826.1	245350	81506.6	71179.6	46279.1	43855.6	49500.4	63084.7	86483.3	295799	1.11885e+07	2.69628e+06	253189	141751	118719	81683.7
351_C	-14383.8	5893.82	12956.2	13765.6	16807.6	9332.18	-562.959	-9215.82	2961.81	16003.2	14704.3	12038.2	22540	39302.3	62076.7	94696.1	31219.8	22086.2	14053.9	33028.3	33055	24244	70982.2	33199.5	248498	236590	193107	950954	62478.5	57992.7	62738.6	182830	158599	108098	247660	83014.8	72203.8	68721.5	50626.6	52150.4	57674.5	92616	301483	1.14189e+07	3.54121e+06	286371	162271	131412	91079.3
351_D	13252.5	11549.6	14673.1	16651.3	15115.6	14370.8	7162.12	21420.4	13819.4	19524.1	24109.3	28145.2	22659.6	31234.7	81483.5	89249.6	31764.2	30980.5	29713.1	45873.6	50675.1	27920.6	90838.4	46715	253160	227330	207490	991043	63280.7	62827.5	74018.6	178622	152475	122018	229891	79392.2	67364.9	57064	74866.9	70866.9	75186.2	110700	328857	1.16598e+07	3.36195e+06	271744	152934	119177	82981.9
351_E	13174.9	-5321.19	15999.7	19605.6	26776	15903.6	15137.9	14629.9	15954.4	11497.8	13483.7	23995.9	32830.6	39545.2	91151.7	108972	30644.1	22400.9	28198.7	31273	39119.2	26941.9	68729.6	49378	225527	270073	157145	1.0945e+06	85447	61843.8	69883.6	155329	160620	91571.5	236179	84432.1	72449.9	74325.1	59079.8	53224.6	49001.7	84264.2	276964	1.10819e+07	4.23584e+06	287672	150490	138655	90045.3
352_A	12885.3	18644.5	13617.1	11778.2	26807.7	12787.8	37900	15820.2	18854.7	18332.1	24674.1	24414.4	17348.1	30142.5	92953.5	109574	43405.2	36926.2	30347.3	46260.9	45894.9	35886.6	91505.7	44652.4	307811	294608	218852	1.1626e+06	80394.3	83389.8	74729.1	151596	163102	110772	254977	79220.1	75306.5	60632.8	68759.3	54763.2	68609.3	107194	289348	1.08366e+07	3.48818e+06	281559	153350	117864	91787.2
352_B	26144.9	1770.33	-847.602	12482.3	20504.9	-9.97119	12113.5	-7163.89	9840.23	11116.3	13274.8	10461.8	21247.6	10083.8	78879.8	93274.2	37816.5	9397.76	6512.01	38316.1	19654.1	21326.1	62041.5	28613.1	237351	244888	163309	1.06532e+06	78631.6	69023.1	46839.7	153632	158811	88810.6	252709	80864.8	65938.5	55860	61141.7	54114.4	77204.8	91983.1	291547	1.21534e+07	3.95202e+06	345412	166431	141333	68751.4
352_C	13102.9	2368.34	6698.83	7095.94	16706	755.863	15517.7	17294.5	12269.6	11857.2	6638.03	13997.9	16314.3	30226.4	75588.9	101471	27532.4	8456.1	8887.11	37474.5	43097.7	44414.9	63271.8	33878.8	274633	251738	212343	1.09914e+06	65815.9	63126	64894.6	164429	133516	98018.9	243464	64793	67001.7	51623.6	57978.9	50798.5	50950.1	100606	318808	1.26469e+07	3.0819e+06	284533	156714	134815	75416
352_D	21346.5	32514.8	25625.8	16315.3	32788.6	25156.7	25326.2	5399.86	16267.6	21374	20716.4	36359.4	28440.5	36734.6	87056	113277	37327.3	24610.4	13693.7	49777.4	53528.2	46877.4	85439.4	32261.4	268368	193487	215324	880916	68795.9	74970	77325	171319	151895	97026.8	230942	74197.2	62205.2	53410.9	75060.1	43588.3	64545.7	111958	306534	1.07999e+07	2.92299e+06	260758	143047	116322	74996.1
352_E	20732.5	10168.9	33246.7	7552.59	13502.3	27816.6	14002.9	24518	27564.7	22087.9	19061	41923.1	28399.5	33774.3	77947.5	106118	33646.9	36292.7	31170.6	62063.1	48712.3	44492.2	83321.3	58724.5	262567	212409	210291	918426	84509.2	78757.2	75368.6	165887	156835	114285	233516	98643.8	80343.3	56857.6	57947.9	69623.4	101152	121478	334566	1.11728e+07	2.81387e+06	294545	142222	121861	97523.2
353_A	17200	17187.9	21862.8	10147.5	6518	3782.25	5996.07	11812.6	15584.5	6963.57	12758.3	5489.47	7506.29	33392	101240	112113	37919.7	26040.5	27482.2	39092.7	34478.2	22556.8	75400.4	45779.8	278384	222826	219240	1.02137e+06	74059.2	74634.8	71253.3	147581	135049	112592	241719	78406	67700.7	57621.4	48378.7	52303.6	57133.6	108605	289826	1.10152e+07	3.52311e+06	275299	157870	129999	86108
353_B	-5785.9	4615.28	6000.07	-9413.63	7097.06	17331.2	13342.3	21525.6	7677.69	4042.75	26713.8	6587.41	18922.6	27997.4	89546.1	105665	22892.1	27108.7	3736.93	13448.4	29355.3	27087.1	73469.2	41008.5	253450	253763	229401	1.25216e+06	56870.4	63439.4	53508.4	146685	154461	89997.3	232400	77528.7	65531.3	62815.4	48736.6	37105.5	49248.7	92893.9	296216	1.20016e+07	3.46505e+06	294913	154957	108980	86567.7
353_C	22873.3	14151.1	30804.3	29754.3	33965.8	12419.4	28025.8	40298.7	36661.2	21325.2	29181.6	43588.6	36396.5	49104.5	104848	119991	52595	35947.1	43698.6	48390.5	57557	53413.2	99465.3	71336.9	360190	265177	297708	1.26969e+06	90184.9	92146.5	91457.9	184896	170839	141085	267061	100724	99663.5	80362.6	100998	90772.6	94713.6	126435	351471	1.12299e+07	2.92118e+06	270476	151778	124725	107301
353_D	11130.7	15427.1	30030.9	-608.878	29096.7	-2083.5	32493.2	22154.1	21508.8	13442.1	2606.5	9861.05	20350.7	19424.6	86884.3	66813.2	33007.5	29987.7	28715.6	40754	50558.6	40811.9	75941.9	40388.2	223104	168074	300616	984817	86331.7	66927.4	75447	156473	136048	122730	202968	72784.6	73175.8	61807.2	62212.6	70161.8	77043.2	112883	390407	1.15806e+07	1.86203e+06	237026	143222	131299	84105.5
353_E	-5200.85	-18236.3	-11723.9	1001.52	-2079.89	9029.99	-5700.05	804.387	6389.66	15530.6	160.428	-6872.3	8112.7	-2000.16	73132.1	88541.2	16042.8	-7341.07	3487.04	30000.6	17009.4	5116.22	38640.6	39541.1	203183	185843	150510	949396	57709.9	39057.4	36934.3	128449	137728	73679.4	205733	57765.3	42569.3	35645.3	19660.6	9052.99	27533.1	57486.1	235042	1.16174e+07	3.03374e+06	270203	131548	111628	70459.8
354_A	1833.11	-3818.1	15086.7	-5748.04	-15538.6	-1147.27	7008.45	-2574.83	2771.13	16251.9	-3366.75	-6029.53	214.201	12353.8	76551.1	77104.3	33240.7	9773.07	6077.08	27532.4	21129.1	7318.7	60201.2	37621.9	177491	219962	103992	728811	54189.5	61915.7	41034.4	124657	171069	99957.9	227049	60279.8	57457.8	31640.8	39128.9	43726.2	71163.7	83480.3	250373	1.05546e+07	4.45941e+06	289708	159606	125363	72211.5
354_B	7459.17	11236.2	18353.3	21276.2	19366.4	10480.3	3211.96	13838.8	25059.6	11398.6	7246.67	23660.8	19109.9	26015.5	58851.4	84594.2	14203.5	22003.9	25599.7	29347.9	26356.3	21322.5	60645.7	47643.4	177189	185613	114692	587905	62165.6	54855.1	67691.9	134077	171637	83976.3	222042	80004.4	69091	41635.4	57782.7	55111.8	75308.7	103105	267844	1.01298e+07	3.69832e+06	285657	149906	121998	76733.4
354_C	-6909.7	5095.7	13677.8	6387.17	17920.2	5543.65	213.819	-1168.44	-1322.9	17323	-2294.7	659.496	18001.1	30001.1	71570.6	101466	39071.3	22148.4	15512.3	33774.4	21159.1	26446.6	66228.7	28224.7	208543	196616	131181	704016	41840.1	47348.6	49060.4	136975	133413	79856.9	209454	76007.4	58042.1	33995.3	36889.2	51736.1	58250.3	99671.1	246005	9.73192e+06	4.05102e+06	285887	143714	97870.5	62168.6
354_D	-5740.57	-1642.51	467.48	9240.51	-2035.32	173.781	3741.03	-7585.39	4253.41	3319.53	-1700.44	292.166	24795.6	13399.4	90484.4	85919.6	17348.3	-1713.08	-3693.4	25005.7	21936	12439.2	33554.9	38588.3	157217	243326	93112.1	765497	56592.6	49196.4	53245.6	128436	185554	71793.8	225724	67289.6	40964.7	30753.6	39231.4	40052	39554.3	78010	274828	1.08807e+07	5.39831e+06	333245	163536	135405	75640
354_E	11095.7	3983.9	6284.46	4362.62	-5513.89	-3281.74	-6326.65	-5864.83	1900.72	-866.729	16062.1	14098.4	20298.2	10799.3	61590.1	88783.5	18838.1	14058.3	15800.7	29240.6	27686.2	14114.1	37473.1	30672.7	138877	198480	104698	646494	50717.1	37860.3	41754	130964	164863	77064	190302	61918.6	47120.4	33563.9	39399.9	35382.6	65268.2	89937.7	249793	1.06939e+07	5.28741e+06	308979	152864	141068	77866.9
355_A	25018.3	16132.4	10691.8	16236.9	8226.09	29414.1	20362	13285.3	25584.3	37481.4	18467	19199.1	24038	19442	70043.7	86667.4	31296.7	16266.7	24354.2	29437.6	36834.6	30917.1	63805.5	57404.6	172139	250653	121982	818874	76935.6	73736.9	75591.8	126564	205013	91764.5	223303	72655.7	74894.1	71154.1	68605.4	70513.6	67549.2	108314	261582	1.01241e+07	5.51189e+06	358019	171033	128221	105704
355_B	20913	19713.4	12005.3	29515.2	32214.8	24185.2	27263.8	21697.2	28585.9	22375.5	24699.1	32387.2	28539.4	40803.3	104966	100974	51261.6	18983.2	30146.5	46750.9	45690	36272.8	78039.9	48105.2	173713	238095	118609	736345	80670.9	67355.6	70284.8	141707	192492	103997	237277	84078.2	88135.7	82901	75115.6	72637.3	90181.1	111423	258877	9.67269e+06	5.43903e+06	309889	172987	147449	83908.7
355_C	-1452.47	8383.46	-9079.48	5224.64	10348.3	8757.35	-1235.02	1532.33	-1623.11	17508.7	22028.7	22793.1	9363.22	7416.66	88180.9	93400.3	26816.6	16536.1	11942.3	36664.1	30209	30451.2	45719.3	21561.9	153116	189126	119129	658635	34019.3	55942.5	49547.7	135713	157484	77742.5	201212	65675.8	41747.6	48216.8	49168.5	51713.2	45926.2	85838.1	284787	1.05651e+07	5.09924e+06	331295	170496	115807	79999.3
355_D	15840.4	5546.04	17700	1849.38	13620.6	13520	13503.4	5019.47	11434.3	5726.04	12560.1	-1851.14	20958	14739.1	77461.7	83611	16540.9	9556.71	17005.1	41556	27554.6	27028.7	58850.8	52035.2	127991	202869	94077.4	682921	44297.8	54290.8	50592.8	141741	192766	73065.3	205497	56992.6	63889.9	52832.7	49760.8	51234.3	61288.6	99743	270021	1.07672e+07	6.47399e+06	355969	180230	126361	85756.7
355_E	4064.58	-11270.2	5714.63	3952.81	-2424.74	13747.4	-6673.68	-1295.77	-1313.52	1789.02	4611.62	-5155.79	-12155.6	9718.27	57843.3	57194.6	9003.16	8224.78	1690.56	10619.5	27281	20645.1	47817	24712.7	153354	186452	120207	662750	38214.4	43294.2	51227.1	122196	149932	68579.8	188996	49763.8	44243.1	62428.8	27762.9	35324.2	54579.4	85894.3	253082	9.80247e+06	5.45161e+06	380326	174005	112336	77638.4
356_A	6277.36	-1663.21	17601.9	5087.76	24846.8	3872.94	6345.11	1171.13	27541.3	2700.38	8922.33	21943	11896.3	28839.6	76420.9	87389.4	32497.4	17542.2	18209	28747.7	31666.5	30600.3	61726.5	25113.7	193626	157013	139223	601797	62381.3	42543.5	54668.4	151620	130509	90755.4	184036	55536.1	45386	39890.5	45481	49688.7	50740.3	92238	249219	9.77113e+06	2.58265e+06	226291	116262	103692	60466.8
356_B	9318.56	7940.13	16133.6	-1130.53	18222.2	18466.5	21861	15594.6	23412.1	10701	20121.4	5415.11	15718.4	7868.44	70507.5	84197.5	21585.9	17412.2	16307.9	21980.3	31249	29038.9	60675.6	32428.8	154005	158656	101046	620197	49041.1	55993.1	50743.5	128766	142412	83202.1	190170	60273.2	65730	57373.1	40019.2	50814.8	54106.3	91716.5	220222	9.3828e+06	4.76199e+06	357065	154032	125873	73941
356_C	-4795.76	-13218.9	-9026.62	-1836.84	3629.26	-3966.5	2464.11	6436.15	22688.4	9020.06	-273.901	1527.35	7212.02	20606.1	68458.3	64879.3	3036.65	5373.81	4404.98	24455.3	22565.4	34938.7	51295.9	25565.2	156756	133140	109711	540710	26962.8	38661.3	33549.5	117161	119553	78084.4	162748	38992.6	44570.6	32474.8	32674.9	28410.8	51607	65684.4	226443	1.00799e+07	3.67905e+06	269069	133540	107057	78369.4
356_D	-893.955	-13520.6	-9557.44	-794.764	-9561.41	-7515.89	-9343.85	-7552.84	-4529.38	-25987	-9706.74	-2015.06	-21422.2	7627.49	55026.5	86038.9	7258.97	-1807.73	4474.8	14677.6	16390.8	10842.7	51773.5	16396.2	168352	148828	112363	635061	30515.3	24782	27179.6	111153	122959	61353.5	154571	21877.1	43676.4	27010.1	27235.6	23286.4	31457.4	71956.8	259638	1.10056e+07	3.71295e+06	285480	131908	92573.5	61553.7
356_E	4266.82	17435.3	4745.5	-416.904	14920.4	3571.68	14058.4	7154.01	24749	19273.3	22068.7	30557.2	22886.2	32485.3	89269.1	105421	27543.2	14672.4	19173.3	33067.2	36010.2	43547.1	61238.8	48451	178094	247230	99922.4	769384	50637.5	55738.7	61237.1	144738	180193	97487.8	228599	77509.7	73299.6	66676.7	59304.1	56417.7	80399.1	101021	282943	1.00832e+07	5.45011e+06	343771	158794	143445	87231.4
357_A	9565.01	13345.4	7194.35	23856.7	13017.7	20302.4	24583	18127	24508.8	13703.3	6493.76	7352.05	3575.9	46820	91388.2	99498.5	40407	15206.6	21428.6	53169.7	47251.6	33326.9	67412.3	49527.9	174749	232307	122115	773084	64202.7	44005.7	65183.4	137205	187202	76866.5	213382	69031.2	69849.4	62281	51799.8	53781.1	76352	103354	241570	1.04989e+07	5.22562e+06	341361	169177	146604	90554.7
357_B	798.031	-3525.99	2521.25	1862.54	-1660.6	-411.167	411.965	-9381.5	-2590.45	-7009.46	5930.3	8454.14	1516.23	1343.23	67651.3	70722.3	10686.8	4504.94	-7104.8	8399.67	9295.04	24406.9	43277.4	4530.03	167450	140408	128669	660860	26944.7	32578.9	34903.2	122617	113190	72611.3	169274	51625.8	44430.3	32710.3	41588.9	28177.5	40019.5	68395.2	226469	1.02616e+07	3.62247e+06	260317	138357	88104.6	58539.6
357_C	12126.1	7945.12	11887.7	6669.86	1191.6	4537.48	10211.1	-244.459	17.3242	5191.37	9350.53	13098.5	15728.7	11054.8	68698.5	68228.5	30315.8	22727.6	23210.8	24278.2	34939.6	33882.2	64220.5	46064.9	160695	187261	105965	647201	49356.4	43939.7	53545.2	125803	157151	77280	192532	76830.9	65920.7	56660.2	52353	45776.8	60570.7	91010.1	259642	1.05368e+07	5.02391e+06	363191	169019	134696	89895.5
357_D	30159.3	22049.8	14311.2	19419.1	-568.123	24538.1	29127.7	28193.1	8718.21	10594.4	26832.6	25655.2	16694	33828.8	97274.6	105286	34328.1	19030.5	18727.2	26394.2	43877.3	39892.8	73259.8	64915.9	174609	233863	137592	781656	67583.8	66896.6	73345.6	149515	186808	104721	223638	90704.8	75787.7	71243.2	66404.5	58603.9	81339.6	121871	260925	1.00776e+07	6.44543e+06	357476	191071	154079	103182
357_E	22921.2	17551	14310.1	4528.08	14742.4	11664.2	2805.88	14039.3	20362.7	29068.6	8698.66	26268.1	2751.03	24533.6	95392.9	102641	23571	24237	31928.7	28188.4	34593.5	49191.9	63385	42507.6	204570	168480	141579	664374	60710.3	66369.4	56458.2	158545	151714	92376.2	211475	73205.5	52646.1	53048.5	67325.5	63783.2	60395.2	93575.2	325458	1.13976e+07	3.65167e+06	294059	151695	121628	77478.9
358_A	5605.52	2308.58	3977.46	19112	1289.06	3181.51	2430.21	7051.45	20240.2	18885.9	9825.25	18309.5	15372.1	18574.8	87424.5	101791	33277.7	21950.9	21617.5	41410.6	39252.9	24074.2	54133.4	37278.3	227392	246882	148960	780704	61214.3	53957.6	58004.2	138696	135305	84195.2	212425	61873.4	60030.5	53981.5	38468.9	48475.7	49095.2	97997.6	277888	1.07907e+07	3.05149e+06	254532	155337	110170	98246.7
358_B	-2665.35	-16587.6	3561.6	7072.79	8185.5	6596.04	3877.93	-827.596	7920.32	24385.6	13162.4	16225.9	2957.17	6884.18	76500.3	77231.9	14713.2	10022.9	10755.2	27829.2	11864.6	23137.8	49462.2	42768.4	206502	239128	124542	813390	52707.9	39174.8	51614.4	118066	165137	80818.6	218595	63084.5	61375.2	34385.6	60150.5	43710.3	54644.9	78374	276258	1.0299e+07	4.38617e+06	304125	154680	121376	88121.2
358_C	11381	18599.9	18926	14239.4	14167.4	17612.1	4058.13	10233.3	17393.7	29938.6	23015.3	21338	32295.2	32606.9	111600	103566	45185.2	34888.8	40514.8	52881.8	50398	33575.2	54816	80772.4	179099	316318	143680	864589	78760.4	82019.5	64241.1	150507	206678	104734	249906	97680	74034.8	66764.4	72474.5	79859.2	82150	117805	336270	1.05111e+07	4.45225e+06	329593	171235	132091	102932
358_D	8161.11	6157.45	8330.38	-4569.25	-6003.13	10425.5	10226.7	-1310.5	-5020.96	-767.265	8870.81	7445.39	-8721.98	8687.4	74439.3	98711.6	20933.8	5609.55	9808.75	17802.3	22160.8	19034.9	52144.3	22207.2	212934	226223	145781	806759	50089.2	56211.6	63444.6	124907	147865	81352.8	220241	51994.1	56542.3	51500.7	45702.2	50366.7	51816.7	74850.2	247515	1.07111e+07	3.18814e+06	248361	142083	116343	62475.4
358_E	20162.8	20025.8	12640.5	24992	14748.8	6871.46	7802.34	18420.8	28024.5	21934.3	19010.3	40881.6	7050.02	36564.6	89619.8	95524.6	45298.6	30443.4	21018.8	43883	41848.4	21691.2	65027.3	65195.6	195405	251055	148368	761731	60828.3	62930.2	67775.6	155069	166600	101913	225550	87318.5	64031.3	60557.6	66917.5	66760.4	67701.3	108421	291999	1.02e+07	4.18423e+06	320618	155067	123749	100018
359_A	39983.1	25770	26601.4	10694.1	16565.6	37299.4	19379.7	15199.4	30386.8	36993.9	19158.2	24364.5	45603	35649.1	98401.6	122847	39452.4	32104.7	27459.1	60880.5	51778.6	39695.1	76154.3	64247	246978	301021	165156	962983	81561.1	69514.5	85613	170986	191102	109572	246365	87082.9	86437.8	76813.5	77739.6	67044.1	92371.6	126491	312749	1.0605e+07	3.94951e+06	289192	163357	136047	87440.8
359_B	12972.1	8246.85	1346.48	-2157.79	-3476.94	10480.1	2565.1	15111.7	9493.83	31.2279	10152	19266.2	7298.1	10190.9	87979.7	106715	28142.9	23852	9363.05	31134.2	25116.4	19818	57247.6	30366.3	251383	202537	189940	744712	62468.6	65410.4	51454.3	154313	153684	90870.3	220395	67100.3	63824.7	33720.7	34876.9	44569.5	52990.4	69699.6	256732	9.48409e+06	2.3095e+06	199682	120393	98680.9	68890.7
359_C	18777.9	32786.5	45171.8	33926.7	33066	38452.9	22884.2	22907.4	45872.3	35033.3	31201.9	49495.6	38092.9	42654.5	101846	125481	44049.4	48035.4	31949.4	50132.1	52591.4	70418.7	87412.8	55015.9	292649	180653	253520	820751	80534.5	87052.1	84797.4	173346	146335	117232	215326	69247.7	89721.3	88674.7	94429.9	75639	90651.5	126659	315821	8.70475e+06	2.31809e+06	223558	140197	106525	103022
359_D	13803.4	15118.5	8101.54	230.4	9180.41	13859.7	14474.8	4570.77	15079.4	15772.6	21334.7	23999.3	24561.9	24373	94566.4	114771	38849.1	22198.5	21219.2	58507.5	28327.7	41334.1	80804.3	40770.7	280957	233240	212204	917309	70479.2	46857.1	56178.3	140213	151445	99328.3	218528	57918.9	58550.2	52508.3	56850.1	51450.5	70022	95644.9	283599	9.95e+06	2.91828e+06	270264	139673	123540	88981.7
359_E	890.252	-3219.73	21647.2	3012.2	15882.4	9175.09	-2947.49	7975.57	-3908.91	21661	19904.2	17839.8	17063	24845.3	72165.6	90968.6	42460.1	18863.7	27649.9	35584.3	39180.9	37735.4	71796.4	47471.6	236326	197464	210748	828709	59830.4	52839.6	43540.2	139665	130245	93083.4	203013	69485.9	62896.5	45616.8	48913.3	42208.3	57546.1	91043.9	268614	9.93887e+06	2.64303e+06	244368	130149	98782.7	73284.3
360_A	24157.9	7980.14	7814.51	19878.4	29171.7	31620.6	17018.9	36639.4	27528.5	26363.2	23189.4	26106.9	15173.3	22221.9	82129.8	107449	43643.9	33534	43317.1	50988.4	47415.5	42806.6	91326.8	52978.5	268895	206150	215656	854340	58673.4	71606.7	70825.2	168272	151448	109241	225360	85510	93993.8	60575	78084.6	66091.1	65192.5	109616	315298	9.91271e+06	2.44859e+06	239807	130995	127061	87618.3
360_B	-4980.57	4500.25	-9424	-15247.5	-16384.7	182.92	-12567.7	-685.458	-13182.6	-8307.72	711.507	-1897.3	-5649.84	13473.7	69660.4	89061.5	470.723	5706.8	-7710.14	24231.3	16828.4	6217.3	46700	14080.1	219636	184364	153105	809719	39256.4	45272.1	41047.7	128917	128339	78454.8	196600	42889.9	30485.7	10745.6	30728.2	31148.5	21542.2	65890.1	220251	9.94233e+06	2.45314e+06	213749	118853	96305.7	57299
360_C	3876.29	-6788.38	-5456.75	2891.96	-3613.88	2366.16	5446.96	23495.2	7670.13	11880.1	20929.4	16005.7	18461.9	15212.2	78314.1	84224.6	23835.6	8375.39	19264.6	26729.8	34174.9	10707	57183.9	39121.5	244516	198653	187673	872404	46898.1	66835.3	49792.7	152889	141635	94172.2	233259	62625.4	58088.8	55606	40394.7	42007.5	45928.3	85000.2	266501	1.06372e+07	2.53977e+06	238041	120637	113809	83532.6
360_D	-4598.09	4200.07	15824.9	4501.15	2204.63	401.381	15824.8	11602.6	21102.9	11546	1929.99	22154.4	15404.5	23527.4	65390.9	86806.6	29897.1	6118.11	825.699	21829.6	33494.7	37965.8	55474.9	27404	233392	209367	171958	910688	59397	47214.8	54943.7	141104	144935	83887.8	241903	60552	69426.8	43057.6	46758.3	33735.1	53676.2	79756	275272	1.03294e+07	3.32193e+06	267251	142870	107166	72724.4
360_E	16179.3	13709.2	7894.5	15480.4	-5960.63	16026.4	18477.4	11473.9	6901.73	17321.7	23487.7	6086.02	19721.3	36652.2	82032.5	109032	44422.1	26270.3	29748.8	47158.1	48517.7	34791.9	65063.9	45711.8	247678	201098	181616	777952	54657.3	67571.7	70840.9	150326	141852	106252	224615	71536.9	70928.5	56952.5	60874.7	50838.5	70245.8	85491.6	269646	1.00077e+07	2.03722e+06	236572	135223	104560	81805.2
361_B	25240.1	23720.6	28485.3	27159.7	17203.1	24315.2	23581	30454.1	27169.6	15796.3	31952	23944.3	17564.4	30764.5	90798	116701	39866.3	16775.1	21877.6	44285.9	44477.5	52754.8	81023.5	46106.5	272061	192757	239808	859742	72085.9	67141.8	68417.7	165966	145879	122233	232593	74260.4	74084.6	62885.4	56118.7	56372.2	67226.8	91755.9	338026	1.10043e+07	2.28984e+06	263280	128369	124018	72553.5
361_C	5920.08	2628.56	-1698.25	6198.81	-2707.03	-5824.77	-7443.63	-539.404	-5274.4	-1386.75	-12690.2	12755.3	-13653.8	-2479.81	72297.6	83544.7	18472.6	-911.896	6368.23	6802.48	13577.2	36130.7	46790.4	22534.8	258151	193822	233987	1.02136e+06	61265.4	38320.5	56325	134748	135373	91465.6	218675	52850.4	39102.5	27563.6	45545.5	39584.7	36343.1	69295	311610	1.16302e+07	2.35544e+06	262880	135038	93164.4	59414.7
361_D	13762	9191.26	28452	29832.4	21170.3	23681.4	31847.9	24374.1	18136	26148.4	30807.4	28766.7	19018.2	40604.1	107616	130083	51632.9	30680.7	37616.8	60646.4	58108.2	44045.8	77565.3	47949.6	322331	215651	255225	929393	80018.9	88881.5	81346.8	175135	163681	119961	243619	98218.5	78811.7	50814.3	71861.7	72117.4	81946	115624	312030	1.02042e+07	1.89343e+06	200891	134840	113349	88013.2
361_E	23060.6	13318.3	18353.2	20403.5	21110.2	20241.2	27236.5	34340.2	25762.4	33538.3	21408.8	20768	25802.2	29701.5	90767.9	108666	47681.9	28406.7	18698	52111.3	57980.4	57884.1	81551.2	33884.6	260997	145558	266785	604775	71387.8	66708.6	86924.2	164654	127325	111098	189809	72202.5	81888.9	60828.1	76312.3	58823.6	73485.3	111012	328113	9.35664e+06	1.32937e+06	207084	130780	101343	65918.2
362_A	8420.34	13572.5	13917.6	1529.9	11045.8	5636.03	4632.96	18244.2	13909	13090.6	13769.2	17231.8	8250.09	20573.3	77452.4	89098.9	12954.1	16465.7	17191.4	36082.1	41961.7	25827.8	63868.3	27294.7	234204	203166	171544	765844	47032.7	49280.3	68352.5	149687	146836	92836.2	196952	73641.2	56461.4	42711.8	50742.1	37047.6	50098.5	75780.2	260954	8.97593e+06	2.54642e+06	226978	147108	104541	76492.2
362_B	-5993.43	13068.6	12416.1	16653.3	-2088.89	7381.61	18205.1	20649.1	22599.3	5483.28	18008.6	23512.4	9247.46	23093.9	77925.6	105735	36067.8	20142.7	5947.87	42745.9	42687.9	25719.4	65633.6	48024.7	261806	240841	200259	951166	64920.1	51458.7	61480.7	134509	130787	103033	219582	60459.6	71720.5	66413.2	64551.7	61215.7	42492.1	80231.6	251837	8.87576e+06	2.73708e+06	220627	127437	108422	66426.8
362_C	7948.57	3806.83	1925.77	-4853.99	-7165.33	900.269	10575.1	9154.36	11700.4	14039.9	12519.6	5816.42	14849.1	15481.9	85007.1	93409.1	43882.8	25659.7	24812.7	32943.4	27510.8	36758.7	74191.1	43497.8	285048	257126	195048	958105	45303.6	50122.4	52447.1	123968	128781	84297.3	194397	63112.3	54527	30645.2	54484.9	40784.8	59893	81752.2	232131	8.37559e+06	3.14872e+06	238620	115839	86264.8	52524.6
362_D	4543.65	3990.64	6653.62	10469.2	18431.1	5058.26	19699.3	11207.6	30698.3	16806.4	15343.9	22871.9	25557.6	27067.4	96481.4	104213	31780.4	26082.6	16845.1	43394.9	40472.1	34669.1	88920.5	48077.4	287582	326123	202744	1.08983e+06	82672.9	62348.3	66597.7	142408	154344	101367	236084	88701.6	66030	66157.6	71348.4	56057.3	58935.5	114834	282869	9.70036e+06	3.55038e+06	266971	141936	119280	75471.7
362_E	5271.97	-5319.41	11489	-1366.92	-5490.24	266.913	-3300.73	-1708.26	4567.35	-2360.97	-3200.46	10497.3	8592.53	2438.35	65479.9	86500.8	11711.8	11820	4265.57	24757.3	17544.4	24080.3	51454.8	37430.6	193078	269572	132421	925635	59977.8	37238.9	53569.9	117324	143033	82191.6	210396	59602.8	42552.7	41940.1	37522.4	40664.5	39517.7	69844.2	232668	9.23236e+06	3.79831e+06	269513	131364	92879.3	51300.2
363_A	-1447.21	-3709.02	-21907.8	-7325.57	-6513.52	-4814.72	2269.37	-11079.7	7626.91	-337.798	-3123.92	13205.2	1489.24	3687.24	67107	81480.7	18736.3	9298.93	4048.76	26324.1	18680.2	-1726.56	45945.9	29297.4	195777	199207	162013	889112	56185.4	54276.1	59490	118036	136790	74302.4	212383	56728.7	45718.4	30860.7	33647.8	19418.2	28631.2	76206.1	238987	9.4035e+06	3.43761e+06	245236	136126	82799.5	64093
363_B	6845.73	-9117.37	-8793.95	8128.38	9302.3	-4507.95	-9768.7	-7577.9	9376.74	7992.98	-1749.1	7988.06	-6732.83	-894.092	71420.9	90207.7	28329	10529.9	6647.15	35295.1	14690.1	16981.6	56539.7	22935.1	216850	273038	145459	992773	58658.1	40186.8	49751.5	116938	142338	93725.3	213222	70925	38981	53006.9	43835	31708.9	44957.8	72894	199972	8.29884e+06	3.77571e+06	265523	121386	84963.9	49677.3
363_C	41537.4	13536.7	28283.2	17761.5	11036.2	17301.4	16587.1	25277.9	11576.8	35081	29165.6	28509.5	27391.8	26594.3	111300	121615	62861.4	24532.7	40147.4	49958	58010.9	57803.5	86610.4	66857.6	235474	299665	172677	937509	76107.4	85683.8	63362.7	153150	169306	117426	240095	97341.3	78701.7	81986.4	62430.7	64048.4	86577.5	126490	308061	9.00985e+06	3.88029e+06	286606	161681	122426	87698.3
363_D	21029.3	13091.1	11277.3	33474.3	19018.7	18935.1	25414.3	23062.5	23897.5	19488.6	27968.7	25749.5	27168.5	47004.2	110984	108502	42927.1	25424.6	44521.7	60289.3	47735.8	50447.8	97317.6	45470.8	289735	284749	231571	1.02327e+06	86870.2	88230.1	74852.6	160099	150396	114408	238913	98242.3	82504.5	66772.5	61108.8	60744.1	81014.6	108763	297277	9.26045e+06	3.75679e+06	262391	152384	123166	101687
363_E	4830.68	3440.78	4631.62	22393.8	9017.95	16470.2	14978.6	20152.6	21133.9	15541.5	15591.4	17035.8	9542.92	15150.4	84932.2	105300	23629.6	20999.8	7815.92	35243.4	34847.4	21554.6	82054.7	35372.6	236209	229575	180699	929593	80478.2	60410.2	51176.5	140963	151502	94863.3	222562	83223.9	78288.7	46719	56963.1	36283.4	41614.4	81974.5	243310	8.44438e+06	3.64375e+06	268600	142919	127946	67464.9
364_A	-16176.7	-6472.04	-16533	-1915.29	11034	-12166.3	1034.8	-52.35	5801.32	1954.1	2094.89	17473.2	-672.431	5513.61	73894.4	85920.1	21067.9	18187.4	8014.78	21400.2	16022.6	7125.29	47470.5	17125.1	269333	181459	177199	726862	36762	44036.6	23738.6	122801	94201	90627.8	189439	33915.6	49566	31368.3	31510.8	30218.4	30190	59364.5	196445	8.30202e+06	2.24059e+06	194202	111295	76561.6	70853.5
364_B	-7322.36	15416	-400.404	11155.4	-363.722	7028.03	6748.33	1610.94	10543.3	2413.37	18639.3	23525.3	8531.66	27353.4	68709.5	73296.7	13065.3	2520.51	12440.9	37326.6	20739	20542.6	63956.6	39143.9	260988	201466	166242	749947	54397	55023.1	40755.7	128288	124562	76993	199244	59987.1	45913.2	48573.2	54212.2	30406.8	40373.1	82320.3	219803	8.42139e+06	2.94519e+06	222890	117413	100996	55918.7
364_C	5371.31	9646.79	5080.18	2283.94	16963.9	18842.1	27891.6	22214.9	20698.5	13258.6	26835.8	14217.5	16254.6	26665	92214	114174	46364.3	15602	10173.1	31825.2	30920.7	35320	92805.5	53708.4	261990	290249	186963	1.02695e+06	76555.6	62835.6	76522.6	146834	154244	111026	237114	69199.2	55072.2	58882.6	51891.6	58289.9	72394.1	84748.3	250444	8.43153e+06	4.43956e+06	270489	151738	127037	80251.2
364_D	14886.7	3807.35	-4184.37	5135.91	1550.82	28279.6	-7362.43	1872.46	3472.21	1490.19	21944.4	11498.2	684.548	15840.6	82731.7	108880	27043.4	9953.73	14350.7	27292.9	27362.1	29248.7	74841.9	34453.5	259884	213425	187884	804666	62957.4	52480.3	67482.7	145285	133192	94383.5	207387	54660.1	52715.1	52640.7	71831.1	54564.3	42274	81095.9	261826	9.11949e+06	2.89469e+06	240245	133050	112149	77262.1
364_E	11460.2	20562.7	26692.7	13360.5	13862.2	19589.3	7045.4	23834.5	20496.5	21264.5	23719	31602.9	23565.7	30160.7	84108.4	107582	49653.4	34671.3	31181.9	55318.8	46183.5	38141	73947.2	39209.4	252462	233054	176096	829609	80613.3	57419.4	58329.1	151325	157097	115565	206694	83464.9	64392.5	54585.7	51940.3	69100.7	72239.5	103270	273941	8.75581e+06	3.49725e+06	318343	157250	120891	82453.5
365_A	13601	28413.1	17453.4	9814.42	9898.83	15643.2	15799.3	19277.6	13677.9	13670.6	20544.2	15422.2	18121.1	36450.1	98667.5	110177	44659.5	15954.2	16852.7	58853.2	44068.3	51805	60092.1	50836.6	231719	345962	161031	1.06616e+06	81991.9	66432.4	71598.3	127466	183127	108850	235729	78523	71461.4	71253.2	78408.6	52232	43472	99257.6	236765	8.15945e+06	4.71447e+06	293825	154504	100485	79135.6
365_B	23080.8	24172.2	12000.4	16859.1	8097.64	4993.55	5046.64	11404.7	33061.3	24830.9	10245.5	22480.3	12998.9	36611.3	85822.1	100012	29846.2	27416.9	33332.3	39135.3	34378.8	33838.3	64637	35286.8	271592	245322	204136	884222	68906.2	65962.2	74622.4	149730	139465	91908.5	213085	65664.5	64660.5	55783	45614.5	47677.9	60852	83992	248180	8.13117e+06	2.88897e+06	242675	138804	111433	74180.1
365_C	931.79	-2217.57	-531.226	15173.3	4812.1	14454.8	2053.09	17525	12582.2	-2405.65	1670.81	9859.62	4245.75	20503.3	95087.8	102998	30565.9	13715	9454.03	29913.4	12116.2	13488	70169.4	30168.7	241822	289669	162540	1.02422e+06	67275.4	59476.5	40824.6	131576	155575	80954.4	211796	71475.5	65619.5	37997.7	42154.2	49805.5	33136.8	85068	210134	8.54145e+06	3.99882e+06	261348	125611	115259	60200.5
365_D	-2364.04	12724	6477.27	2603.48	-12628.3	-2480.99	-12994.5	-12268.1	11643.1	696.454	-4384.79	4553.35	11101.5	10207.9	56585.3	90532.2	26381.5	16742.4	18332.3	23350.1	18994.6	21179.1	55654	15735.5	258793	173379	190897	732767	44790.4	34937.3	34177.8	136251	89893	86923.8	180952	41411.1	32934	31281.8	33726.8	35826.8	45524.7	64991.1	223835	8.87333e+06	2.53547e+06	225885	117254	83748.9	54498.1
365_E	2866.69	6072.17	16991.8	23765	814.485	12111.3	28239.6	14747.3	15305.3	19694.6	15286.6	15954.1	33252.5	12079	83487.6	103883	22623	13466.9	18089.6	45249.3	48467.5	35210	65611.4	31586.3	236116	241705	155784	837743	64684.6	67517.2	75633.7	154113	156738	96714	241275	77259.9	61934.6	63915.9	41605.5	53229.4	57541.9	94578.7	253455	9.30206e+06	3.06059e+06	233445	137361	116402	69578.9
366_A	26016.7	23424.9	12772.5	24203	24942.7	9260.99	15552	21602.9	33795.3	8643.79	23549	15372.1	28506.1	32242.4	84536.9	108507	27845.2	16036.3	36407.9	33719.1	41662.1	55832.7	69382.4	40156.5	309853	173186	246939	717995	58536.3	78224.8	57855	150437	110654	105950	202779	88590.1	82128.8	48243.3	61718.5	43193.9	69804.5	96298.6	247256	8.6415e+06	2.01079e+06	208065	110222	105049	73718.3
366_B	-2022.29	9418.57	8488.84	8683.37	9157.48	16447.3	19286.7	3410.03	3641.01	9987.22	19820	10764.2	13333.7	24202.2	87297.6	82939.1	32641.6	19657	25189.4	28468.6	29727.2	19413.5	76372.7	45306	268454	268689	185334	946129	66683.2	59198	55111.2	131137	150413	92370.1	230709	70763.4	44649.9	51185	58162.8	39687.7	63263.8	100024	252993	9.88987e+06	3.95041e+06	312633	149656	120965	93784.1
366_C	23171	26519.7	15313.9	17754.8	7576.43	11898.4	9995.67	11672.4	23861.5	17146.8	16159.6	34568.7	21739.7	35479.4	92779.6	118024	39471.3	25051.5	37523.5	37693.4	39524.4	44353.7	79430.1	67164.5	303969	214762	240167	858542	68132.9	83068.3	62236.9	161064	127803	115374	234916	76788	78694.6	69949.1	70423.1	57937.3	67255.2	104597	265939	9.52884e+06	2.54212e+06	245109	133619	115754	74610.8
366_D	-4389.71	10780.6	5800.94	-2350.05	6841.42	-9575.79	-5736.43	-11526.3	5815.11	-4699.75	-10591.5	6393.82	-5369.23	16691.3	74538	97129.2	20068.1	15773.8	-4436.31	13314.9	16535.8	21035.5	70075.2	25126	276467	271587	182623	1.08302e+06	63701.2	26882.8	47215.5	130098	130157	91862.3	231926	58440.5	53307.3	57157.2	28799.7	31980.3	41287.1	79952.5	241248	1.05856e+07	3.83914e+06	286167	144070	119178	57434.6
366_E	3458.27	9397.64	14050.6	12452.5	29920	32509.6	11134	17331.3	12990.1	14641.9	14880.6	16713	28101.3	23103	102341	100999	44052.5	15125	30196.9	40911.4	41865.4	45286	78431.8	44459.5	289913	243820	214726	985532	67459.1	55454.4	63220.7	149064	139166	103501	234371	81206.4	54237.9	49507.4	54980.4	54312.4	60320.8	96542.8	293741	9.76616e+06	3.27486e+06	255642	144403	130286	88142.2
367_A	-5959.92	-1998.49	156.051	16790.8	-720.203	4790.14	4417.28	11544.8	16226.6	546.665	1600.43	16694.2	27280.6	15648.5	65242.3	95738.7	29038.9	7513.33	14155.2	29533.1	34371.9	26796.4	46512	9960.28	247380	145787	190602	758886	46409.4	37199.8	41820	140564	107297	72875.8	183084	42065.3	40138.4	40067.3	34962.4	39801.2	30244.8	79593.1	250507	9.70182e+06	2.48892e+06	226506	125684	98930.2	67106.5
367_B	14069.8	15188.2	21652.8	19938.5	17256.9	24066.2	11491.9	19366.4	10065.6	4053.97	10386.7	25159.2	32453.9	44689.6	81470.9	111103	36047.4	27835.4	25807.3	34957.9	43867.5	33966.3	73042.8	31243.9	274581	204259	224983	903062	67337.5	74384.1	62012.5	153287	151156	115666	209779	70024.6	58134.6	43707.4	61729	55005.2	61205.4	112637	298509	1.00682e+07	3.20814e+06	284393	166887	116407	93510.9
367_C	31026.5	23849.9	17137.8	18643.6	13368.2	16466.8	25658.4	22047.4	42558.5	25967.1	34344.4	22913.8	38589.7	33027.9	117420	132890	42416.4	40048.6	23786	47407.9	59836.5	58094.6	97651.4	52590.8	290230	256612	200944	958536	78839.4	83176.5	86650.8	175406	178164	125734	247840	76780.4	92266.9	67803.7	72702.8	84459.9	86607.9	119280	326026	1.02462e+07	3.48633e+06	281412	163356	120556	85944.1
367_D	4891.22	2548.86	-6895.04	65.9614	11019.7	18086.9	20749.6	4277.62	14235.7	4506.27	3348.03	15795	15367.2	15453.7	62710.5	92666.8	27455.3	14606.5	18739.5	20930	23204.2	12368.6	53697.9	32324.6	280212	189298	236795	899479	64496.8	63316.6	51730.3	147513	129352	101290	202966	73854.8	47413	39937.9	47111.8	49316.7	50041.8	85432.3	277034	9.96016e+06	2.71022e+06	228350	122359	104095	60998.6
367_E	1547.39	-4809.38	-1787.36	-2673.72	287.582	4137.83	-401.222	17833.3	15717	12600.7	632.841	-434.117	227.833	15827.6	94442	105263	24856.9	10031.8	7166.07	25098.2	36322.7	31456.6	75581	27126.2	245082	249107	187797	941084	58535.2	68605.7	50828.7	131588	134131	89304.6	221174	64165	61880.4	46813.7	54770	47747.5	58736.2	95345.4	267782	9.90793e+06	4.41602e+06	286719	167016	128850	68804
368_A	4305.43	8682.8	4476.91	12724.3	16801.4	13013.1	13943.8	-2791.35	-3431.09	25957.2	10740.1	26610.2	1028.2	21427.2	70570.6	100577	24364.1	11467.7	9171.83	45143.9	27443.1	21979.1	62661.8	35116.9	276691	222682	180540	810173	61124.8	63562.5	59086.4	145193	128604	104111	222340	60111.4	64333.5	43882.7	52595	41572.9	48883.6	87708.8	262602	9.90704e+06	2.56586e+06	241944	121022	108316	82737.6
368_B	22431.2	21266.9	41984.1	21530.9	25150	35717	24339.1	29158.5	42190.2	30716.3	26679.8	15930.3	28894.2	50800.5	121506	134947	33721.6	30170.7	35223.3	61227.4	58780.6	47625.4	86641.8	43647.5	282785	266531	186819	889185	78074.2	89574.4	89435.5	179838	187846	118344	255734	101088	86844.6	90944.1	67492	72575.1	88271.8	125904	349497	1.08947e+07	3.42882e+06	268828	146282	138966	101844
368_C	8772.39	13306.9	24500.1	12213.1	17997.2	11718.7	18427.8	9090.91	17480.7	10211.2	9493.66	23595.1	10192.2	16067.8	82012.5	106067	37895.4	21756.5	21487.4	41726.1	46797.6	26614.8	76437.3	45180.6	226506	251330	145408	893356	72441.4	57782.6	59356.1	159468	172918	98451.8	243126	84542.7	70735.4	65486.3	61538.4	63912.3	66076.6	100948	315674	1.11852e+07	4.85563e+06	355087	160297	146548	91738.8
368_D	11662.9	27541.5	27276.3	2674.4	4654.49	2152.99	3251.17	10053.4	12611	11820.7	21588.1	12050.5	14702.8	29659.9	115034	108988	37136.7	25147.1	10063.9	40446.2	45072.1	31816.5	76625.3	27883.9	246753	254253	175018	849442	56501.3	56423.4	39606.5	153857	162782	97096.4	242269	71683.5	72983.1	55453.3	62246.4	62101.8	58733.6	94676.7	318725	1.13973e+07	3.56391e+06	288470	163528	136165	89086.4
368_E	21209.8	7157.49	12466.7	11876	22702.4	9856.11	14675.6	21135.2	21191.4	19864.7	12739.5	12044.1	24258.5	29763.7	77886.4	103182	33308.8	14949.4	27479.9	20563.1	43060.2	32891	81767.8	41576.7	286875	217246	208125	789099	63963.1	59106.5	65043	161376	135988	107090	218278	70024.7	63855.5	50813.8	56694	63413.2	69735	92398.5	295778	9.6659e+06	2.97414e+06	261673	150181	128246	80181.3
369_A	306.983	9276.48	6859.24	15926.8	16538.1	7647.54	14109.6	14528.6	9880.67	18660.5	14113.7	23324.9	4895.77	15664	72573.9	88445.7	21113.6	17174.9	5805.1	28994.7	16658.2	28514.5	59990.1	27736.3	295282	167105	257402	727551	53891.4	64390.3	50908.4	158690	110766	89176	190153	57056.5	52985.1	51997.2	49957.6	45239.5	42669.5	86375	325336	1.06752e+07	1.79527e+06	233130	109118	89382.2	64145.7
369_C	9566.87	13039.2	13932.2	11628.8	13403.5	22259.2	9549.19	16784.1	1543.09	18676.8	6856.16	25570.6	18613.7	19715.5	68532.2	100339	34206.1	15758.1	16915.8	31286.3	45703.8	41458.1	68221.2	27241.6	308268	158168	265031	659363	68025.4	51391.3	56512	156578	111829	94929.6	186017	58940.3	60420	45164.6	43728.8	41155	60932.6	78390.5	266587	9.06028e+06	1.74865e+06	194807	113657	112082	52052.1
369_D	-6191.8	-808.332	3744.85	-8235.48	2635.24	-12370.6	-8279.19	-11413.1	2953.58	6027.8	4510.42	3156.02	4720.87	9330.16	71070.3	88791.8	22308.4	285.052	15654.3	24928.8	22330.7	27007.1	43080.9	14007.4	252543	177631	195658	710163	35725	42049.7	47152	149479	122806	97656.5	198073	43322.3	43804.6	21602.4	50795.7	36751	44782.7	75086.8	267620	1.11989e+07	2.31096e+06	233237	141309	106519	64630.2
369_E	1792.25	-5713.35	5116.15	4903.48	11000.2	3437.32	53.2899	4448.72	4514.53	-3740.6	691.124	4034.72	3997.75	6833.25	66419.8	89366.1	20006.8	20203.8	12273.3	21106.5	23263.8	32673	59608.7	14514.5	255839	175580	199645	757347	44820.9	46468.5	50115.3	144172	104709	68560.3	190686	45386.3	40601	47536.1	30732.7	43358.3	48262.5	72080.6	263745	1.04052e+07	2.47543e+06	234217	126018	92049.7	49461.2
[truncated: 428 more columns]

## Sheet: Bucket-green
	9.975	9.925	9.875	9.825	9.775	9.725	9.675	9.625	9.575	9.525	9.475	9.425	9.375	9.325	9.275	9.225	9.175	9.125	9.075	9.025	8.975	8.925	8.875	8.825	8.775	8.725	8.675	8.625	8.575	8.525	8.475	8.425	8.375	8.325	8.275	8.225	8.175	8.125	8.075	8.025	7.975	7.925	7.875	7.825	7.775	7.725	7.675	7.625	7.575
HA_346_1_1	30207.2	8895.47	47995.6	49862.5	36785.5	69115.2	35770.8	21895.9	24605.1	65558.5	39306.3	47606.9	96591.5	87917.2	51902.3	102182	196902	1.27814e+07	550738	207152	183329	318478	7.34552e+06	1.78875e+07	447910	236738	203260	311447	232086	220235	448136	291124	297743	493382	459385	546159	687608	4.64228e+06	8.8088e+06	717961	597184	654714	1.07701e+06	3.52436e+06	1.03148e+07	1.59585e+06	1.11088e+06	4.58335e+06	1.85096e+07
HB_346_1_1	29043.6	25543.2	15209.2	18026.3	33160	32228.8	17580.1	38399.6	17448.1	34325.6	30023.1	17106.2	74123.1	71599.1	69315.1	72421	189986	1.33407e+07	601460	197086	167948	313955	6.60301e+06	1.99258e+07	496873	237332	237059	335751	268340	282436	453128	269935	341822	508284	454196	538846	736616	4.54284e+06	9.64641e+06	804419	675374	702361	1.05968e+06	3.12012e+06	1.24244e+07	1.84537e+06	1.1261e+06	4.34587e+06	1.86378e+07
HC_346_1_1	4005.53	11303.5	-17087	7616.57	28710.6	2141.95	-7764.72	20141.8	17351.5	14031.5	17062.6	12576.9	59298.8	47695.7	12830.9	52209.7	149206	1.51677e+07	875964	213488	120316	285812	5.8098e+06	2.43886e+07	623682	224423	217235	334096	234874	221922	406080	275446	282463	481534	420247	491926	686737	4.69592e+06	1.11838e+07	819586	603749	617929	979201	2.2342e+06	1.20904e+07	2.17034e+06	1.19668e+06	5.22076e+06	2.20206e+07
HD_346_1_1	36316.7	28501.1	43874.7	24910.7	30194.9	63339.7	50629.2	36053.7	43829.4	32764.2	53071.9	14956.8	102524	76430.9	43390.3	86788.3	177472	1.37463e+07	647185	177361	167766	314814	6.57704e+06	2.07235e+07	501399	253114	227055	325748	248743	235315	427540	301935	332237	506577	489894	539843	720989	4.63461e+06	9.83433e+06	789795	647059	682008	1.0569e+06	3.00821e+06	1.24985e+07	1.86044e+06	1.16065e+06	4.48735e+06	1.93192e+07
HE_346_1_1	58077.3	19773.4	31094.6	57390.1	29982.9	30508.7	42103.2	20931.7	15529.3	52243.2	31620.8	29599.5	84733.1	75974.4	61345.9	91804.9	195728	1.41432e+07	741926	201784	197121	343489	6.33813e+06	2.17064e+07	595540	238907	223835	348930	245946	227769	415354	267242	293371	496913	466621	517673	714816	4.64171e+06	1.02135e+07	816057	618379	667068	1.07979e+06	2.94457e+06	1.16336e+07	2.06247e+06	1.21303e+06	4.69015e+06	1.91124e+07
HA_347_1_1	52178.4	64768	69687.6	67884.5	72037.8	98227.7	80640.9	77939.7	97907	76114.8	76654.2	72267.6	142877	123325	97675.9	130377	248194	1.41462e+07	709138	214102	198350	404094	6.81305e+06	2.13007e+07	505133	257323	246820	372117	258367	268701	452886	316816	341850	527666	458918	560244	688468	4.72244e+06	1.01388e+07	761938	606778	670352	1.04249e+06	3.05756e+06	1.11456e+07	1.63553e+06	1.14144e+06	5.12965e+06	2.02385e+07
HB_347_1_1	7912.5	-14558.8	-6841.31	8680.65	6619.93	18727.8	10752.1	-1130.69	21632	12803.4	27958.1	5941.1	67193.8	50647.6	26469.6	33751.5	147981	1.34542e+07	674885	146502	118778	275027	6.05865e+06	2.08187e+07	473712	180348	176868	295065	196732	208015	357239	223794	222938	440094	354456	425765	577125	4.32299e+06	9.74064e+06	656084	534039	532885	941040	3.08936e+06	1.22362e+07	1.62174e+06	1.04918e+06	4.67596e+06	1.99164e+07
HC_347_1_1	24108.7	17977	35991.1	43990.9	27399.3	71224	25090.6	27722.4	36702.6	30339.7	60321	52678.7	102726	55510.2	55366.7	78939.4	148782	1.41296e+07	708812	174380	139064	285643	6.45394e+06	2.18267e+07	487575	251489	233039	312308	249846	246995	417019	276523	275053	469396	423457	497448	633766	4.62664e+06	1.02573e+07	753316	569634	623093	994223	2.63493e+06	1.37796e+07	1.94528e+06	1.06376e+06	4.53428e+06	1.87654e+07
HD_347_1_1	18943	23226.9	44007.1	21876.6	30158.3	29459.2	41160.3	13942.6	42923.3	32235.5	28129.8	13116.4	93726.6	63075.6	47839.3	69798	177371	1.34118e+07	638772	193030	159463	294945	6.44957e+06	2.02756e+07	484436	238406	197695	329365	246112	219687	415637	290187	316375	510990	466057	495161	671543	4.52358e+06	9.61768e+06	748224	581969	606375	1.00708e+06	2.96367e+06	1.23449e+07	1.71977e+06	1.10424e+06	4.82057e+06	2.02192e+07
HE_347_1_1	70028.1	69971	25348.9	72351.6	52162.1	73684.8	91014.1	75843.2	72671.1	75400.1	83130.4	74023	145229	139322	104515	118513	258842	1.41838e+07	664212	211745	225929	394920	7.06141e+06	2.12332e+07	488424	244051	231001	370599	263965	278848	468541	356459	351115	560454	502110	568685	722659	4.83023e+06	1.01877e+07	791458	642566	662306	1.11454e+06	3.19028e+06	1.33824e+07	1.8421e+06	1.18017e+06	4.69156e+06	1.81231e+07
HA_348_1_1	46903.6	37533.6	23897.7	32581.8	43365.6	49076.9	34873.5	41889.7	47662.6	71259.7	59898.7	48367.2	103507	79595.7	91568.4	108254	215240	1.3216e+07	584068	209543	191929	318981	7.185e+06	1.90573e+07	482631	254281	243116	338295	296565	304042	483405	336960	397592	554428	528192	571504	783712	4.70586e+06	9.36107e+06	844641	716898	732267	1.14838e+06	3.2348e+06	1.3394e+07	2.04788e+06	1.14647e+06	4.26226e+06	1.58778e+07
HB_348_1_1	44932.7	52349.6	46437.6	68681.2	84113.1	36790.9	49761.9	61325.1	55327.3	94142	81584.8	41818.6	125361	106604	107704	101310	224074	1.45672e+07	713080	218065	200925	354209	6.54592e+06	2.2443e+07	527822	273690	238749	370098	256023	258921	407654	311995	334926	518395	460057	546183	683787	4.72064e+06	1.05398e+07	790281	626922	654817	1.04176e+06	2.65477e+06	1.25357e+07	1.95093e+06	1.13471e+06	4.79841e+06	1.99537e+07
HC_348_1_1	55246.7	62460	29644.1	34318	27447	57316.1	56540	65380.8	45140.6	64581	52933.6	78601.3	132392	97615.8	89456.2	115887	212199	1.52947e+07	783210	218023	233283	364240	6.98817e+06	2.35233e+07	603412	294141	280893	395617	304946	310875	484499	401867	420254	643412	572974	649698	823257	5.08393e+06	1.11391e+07	908721	722575	753533	1.12065e+06	2.71844e+06	1.29972e+07	2.04246e+06	1.28005e+06	5.06591e+06	2.02155e+07
HD_348_1_1	-5614.99	-5353.56	-17512.2	-31508.4	-33540.4	-29452.9	-23724.2	-35434.1	-52096.2	-17176.3	-35848.7	-21171.4	9968.14	14237.4	-20973.1	-3627.05	66159.1	1.46982e+07	817260	141287	79112.7	214836	5.57581e+06	2.40238e+07	534648	189099	178106	296778	170035	194788	343197	247393	252514	443740	393958	459293	611408	4.48519e+06	1.09882e+07	757122	536559	553238	850511	1.99785e+06	1.16851e+07	1.89912e+06	1.10874e+06	5.48457e+06	21941760
HE_348_1_1	17451.1	36414	48974.7	55578.3	43019.8	26050	49737.9	35366.7	31773.6	52263.8	13440.2	28959.9	80297.4	68486.1	43018.1	86842.3	180611	1.36418e+07	685553	191837	165182	325919	6.40487e+06	2.06641e+07	550092	252518	224481	356499	270115	259899	403502	307934	312785	508425	459514	543618	708423	4.57924e+06	9.78742e+06	800456	643867	680848	1.11315e+06	3.18972e+06	1.20509e+07	1.88021e+06	1.16909e+06	4.73604e+06	1.95353e+07
HA_349_1_1	25381.4	43718.2	33325.7	27128.7	36601.7	49063.9	27850.5	5883.31	25039.1	30099	70197.8	38346.8	72748	73656	61049.5	105049	206427	1.45649e+07	685638	190273	177175	332132	6.84862e+06	2.20732e+07	524786	258158	242864	329553	248513	243401	435433	312358	310372	506211	454502	492033	648761	4.80115e+06	1.04302e+07	765257	568371	628622	988976	3.3488e+06	9.83794e+06	1.48688e+06	1.1891e+06	5.81342e+06	2.10824e+07
HB_349_1_1	31714.5	44774.9	53078.2	77128.1	76355.9	85159.1	91281.9	96119.4	73120.8	92413.6	70745.3	108808	137475	131686	115845	148568	260324	1.40017e+07	618820	203801	213509	374946	7.10805e+06	2.07394e+07	463323	235080	231502	367138	261668	288615	464816	303976	327278	522132	454443	545473	735308	4.75075e+06	9.93942e+06	767216	616786	655691	1.08196e+06	3.17512e+06	1.31902e+07	1.78947e+06	1.11813e+06	4.36997e+06	1.79708e+07
HC_349_1_1	45629.8	18291.7	49822.3	19872.7	40553.3	22821	34272.9	45346	36793.8	23980.9	8163.38	26960.7	74765.9	51740	60081.7	63815.9	190388	1.35553e+07	592502	174930	129918	309588	7.09425e+06	1.98099e+07	476288	223778	212267	311884	199579	227481	438340	273988	252548	498805	423922	498322	642813	4.65871e+06	9.57626e+06	748019	586603	625472	1.02713e+06	2.79575e+06	1.30048e+07	2.04119e+06	1.08306e+06	4.24945e+06	1.68417e+07
HD_349_1_1	55746.2	45528.3	54660.8	43776.5	52857.9	74768.1	79534.7	67033.7	61873.4	77944.7	72340.9	71418.3	136417	103935	88317.3	126330	255098	1.34615e+07	670991	220943	193302	354897	6.12141e+06	2.07611e+07	500606	245512	228084	364748	280750	306016	475765	339990	393205	570834	490078	597025	754915	4.3868e+06	9.88167e+06	842693	681417	699235	1.08002e+06	2.64945e+06	1.38814e+07	2.05944e+06	1.16066e+06	4.34356e+06	1.7715e+07
HE_349_1_1	60502.7	37210.3	52850.5	47096.9	47890.5	49938.2	50633.9	16306.5	46744.1	67424.1	75534.8	52907.7	89856.8	72031.7	71429	130065	200273	1.37597e+07	668699	207537	181873	345681	6.00624e+06	2.14538e+07	498325	243015	209620	342360	255852	261429	478110	331442	345000	532743	487091	571148	739693	4.51304e+06	1.00754e+07	834743	645491	675445	1.0691e+06	2.65288e+06	1.4685e+07	2.09286e+06	1.14722e+06	4.61669e+06	1.6429e+07
HA_352_1_1	9322.85	6068.54	9179.21	17760.2	22320.5	29243.3	46307.6	41215.9	60794.4	38369.2	27852.8	57999.2	116425	56613.8	48435.8	73900.1	208675	1.35992e+07	500569	188730	148820	299321	8.48594e+06	1.85467e+07	434572	223256	224506	329727	222497	245777	420669	253420	283239	479846	429335	520540	610903	5.02852e+06	9.29616e+06	653877	524182	609920	1.01216e+06	5.76068e+06	8.33404e+06	1.2427e+06	1.15469e+06	4.94298e+06	1.75856e+07
HB_352_1_1	40466.4	48472.2	48241.6	51757.7	66780	52065.5	55469.8	63937.4	56772.1	54293.9	60967.7	56958.3	137965	113464	77228.1	118935	221001	1.45855e+07	630164	230268	183277	341165	8.03599e+06	2.10227e+07	466656	256461	259638	387962	255849	275113	444878	356705	357288	538170	495489	547111	666085	5.05989e+06	1.02717e+07	726955	594675	651075	1.02018e+06	4.63711e+06	8.76252e+06	1.3194e+06	1.23618e+06	5.61162e+06	2.03549e+07
HC_352_1_1	10533.3	19889.1	10568.1	25701.4	1092.82	4292.37	33284	31290.4	34092.4	26354.6	30334.3	30073	103347	50686.5	55475.3	52425	170160	1.66144e+07	783236	176050	140585	316046	8.09809e+06	2.51129e+07	552581	215449	237952	337242	236429	239471	432298	244609	295438	465723	410632	460065	642373	5.42964e+06	1.18655e+07	736061	516258	566747	907668	3.44176e+06	1.08384e+07	1.34997e+06	1.00054e+06	4.99217e+06	2.01623e+07
HD_352_1_1	36834.7	40961.1	35254.8	45875.2	35737.3	23103.5	42771.4	30022.5	45844.2	73013.4	25091.6	34451.4	114386	89542.3	47068.5	129242	201571	1.51698e+07	743528	220366	168869	315478	6.47054e+06	2.37679e+07	539949	256736	230865	331522	233484	225968	440787	298053	293104	467543	430486	501189	605450	4.82077e+06	1.10159e+07	711864	545828	560967	933585	3.06896e+06	1.15833e+07	1.44871e+06	1.17758e+06	5.56341e+06	2.14792e+07
HE_352_1_1	42480.5	19294.6	28716.9	22807.4	24649.1	53322.7	40917.4	64989.8	39566.6	28541.1	24759.8	29450.5	113371	66358.1	55093.4	87530.5	191095	1.48607e+07	669695	201546	174099	326529	7.6605e+06	2.20135e+07	506318	218931	220057	343639	238062	246618	456163	310067	309532	538636	452657	523930	670106	5.01026e+06	1.06343e+07	731844	608662	613075	944540	3.85805e+06	9.21523e+06	1.3004e+06	1.21013e+06	5.47763e+06	2.01799e+07
HA_353_1_1	78969.5	93302	45239.6	77890.2	58698.5	70181.2	67687.6	52192.7	98349.9	97503.7	88997.9	71226.7	144964	121801	105863	153872	244193	1.56195e+07	686524	237737	207588	358231	7.8841e+06	2.32174e+07	510673	243762	253614	360079	276473	262589	456497	308811	339354	531473	462785	571303	655989	5.197e+06	1.11316e+07	740515	572679	621937	940693	3.43512e+06	9.8142e+06	1.31562e+06	1.18515e+06	5.62067e+06	2.06508e+07
HB_353_1_1	6833.89	-8810.01	14216.8	-4223.08	10220.2	18322.2	25295	39898.4	21369.5	17743.3	12703.5	4593.12	64737.9	57473.1	42140.9	47491.3	140432	1.45727e+07	666247	172091	165029	290975	6.72235e+06	2.2302e+07	525106	214826	213468	342050	247894	210666	459884	306655	337856	474740	463043	521300	663767	4.78602e+06	1.0526e+07	733145	570421	639921	992944	3.09472e+06	1.17579e+07	1.63143e+06	1.20386e+06	5.0533e+06	1.96311e+07
HC_353_1_1	39877.1	42966.7	30270.9	45147.6	40754.4	41339.2	44463.1	20821.9	58970.5	45318.6	71376.6	65839.7	122091	79076	82027.4	76763.7	232709	1.48512e+07	660737	201306	190237	340553	8.62332e+06	2.09733e+07	516772	248796	233187	354622	265170	276374	467085	329690	344938	504950	452206	539778	666038	5.33847e+06	1.02947e+07	733627	585637	658696	1.02417e+06	4.41194e+06	9.34144e+06	1.36185e+06	1.19164e+06	4.80136e+06	1.76485e+07
HD_353_1_1	22688.4	51461.2	35294.3	30721.6	21933.2	64076.1	49590.4	52533.5	38355	63578	36192.7	48946.7	126614	98215.8	91473.7	126764	231803	1.62848e+07	743327	216454	212903	351924	8.2894e+06	2.41771e+07	546745	283503	280116	411924	288766	300795	481464	368651	402385	579741	517761	614189	762346	5.58341e+06	1.15918e+07	832993	644475	686282	1.04495e+06	3.45285e+06	1.14689e+07	1.53301e+06	1.19684e+06	5.16142e+06	1.96746e+07
HE_353_1_1	42989.8	45820.5	40859.5	33184.9	29975.1	67670	62205.1	56065.9	41207.7	74146.2	75121.4	43454	110311	77723.5	92730.7	119395	188105	1.33004e+07	519732	184546	187183	307952	7.83615e+06	1.87173e+07	455613	226179	238584	325232	232097	241926	412176	310346	334436	484829	416977	527280	616955	4.82172e+06	9.20057e+06	685617	530560	577297	942614	5.30688e+06	7.68906e+06	1.15407e+06	1.20482e+06	5.4474e+06	1.97575e+07
HA_350_1_1	55317.6	51131.7	49213.6	65548.6	76052.8	51484.3	79085.5	63730.2	58063.3	70352.2	87635.7	80088	132949	108615	84757.9	162020	263662	1.60395e+07	723168	242550	249492	420522	8.61792e+06	2.33483e+07	536337	294812	280025	420373	315133	304406	698429	425439	412112	627334	577907	657660	837758	5.65442e+06	1.13366e+07	877797	702711	726019	1.12112e+06	4.76359e+06	8.5522e+06	1.41335e+06	1.35732e+06	5.60028e+06	2.09059e+07
HB_350_1_1	38352.8	30805.9	18525.3	29877.6	39931.5	43194	68655.3	59104.2	59638.7	43196.7	35443.8	49761.3	106416	85138.8	44287.8	127115	240604	1.5399e+07	635291	230330	162297	349067	8.69644e+06	2.19649e+07	474504	258141	234564	364032	274254	275103	652399	354295	380807	580253	537324	587535	752724	5.49708e+06	1.07777e+07	817405	625981	681532	1.05918e+06	5.5616e+06	7.38955e+06	1.25866e+06	1.34722e+06	5.48123e+06	2.04887e+07
HC_350_1_1	38922.1	42047.8	33394.8	44041.7	52110.2	56929.8	51606.9	62608.6	91289	57492.8	71215	69639.2	136315	104614	116446	127379	265542	1.6078e+07	596131	213633	215373	380834	9.88039e+06	2.20826e+07	481398	264675	274885	401629	313152	325799	747726	406250	429583	672057	553690	655950	859122	5.96732e+06	1.10892e+07	876826	752893	777797	1.23082e+06	5.39995e+06	1.03255e+07	1.4522e+06	1.26507e+06	4.35631e+06	1.79358e+07
HD_350_1_1	47755.3	36799.2	20948.4	89538.6	30907.7	67740.5	65754	55335.8	42101.7	31686.1	36384.8	68348	130212	69582	82142.9	87506.7	201390	1.50328e+07	636940	196246	180029	312208	8.52059e+06	2.15037e+07	471144	256973	261107	364728	273255	263864	619706	330987	364226	572110	509423	592042	727370	5.3535e+06	1.06342e+07	788040	625776	698617	1.06595e+06	5.57613e+06	7.71026e+06	1.27704e+06	1.30287e+06	5.12194e+06	2.00481e+07
HE_350_1_1	-6078.3	13707.3	875.487	20199.7	19666.7	25229	33776.2	-15680.2	16121.7	42824.3	14043.3	30058.3	86860.8	79134.7	36544.6	77984.7	145829	1.60142e+07	736879	189780	158066	278253	7.31528e+06	2.48127e+07	540031	265117	243868	367330	271607	295466	646945	365570	388738	592076	525466	582649	800035	5.23919e+06	1.17532e+07	832394	630191	658714	1.03305e+06	3.2634e+06	1.12056e+07	1.49033e+06	1.17021e+06	5.20946e+06	2.11013e+07
HA_351_1_1	7717.56	-15800	15002.8	-8416.73	1011	31862.3	25830.6	25809.1	-363.801	21317.1	2318.45	12270.6	61777.3	64862.9	36482	48919.2	153003	1.615e+07	756527	190161	153512	266228	6.77688e+06	2.55735e+07	493677	212924	208138	323914	209450	191670	471987	265137	268648	450051	400391	456807	580259	5.0481e+06	1.1782e+07	704868	479204	504970	830348	3.01013e+06	1.2034e+07	1.29588e+06	1.0133e+06	5.09784e+06	2.17331e+07
HB_351_1_1	12506.6	32544	21116.4	-577.84	31113.8	2689.56	15942.1	22113.7	37501.8	14431.1	17457.4	1806.81	61357.5	58855.4	42693.9	75649.6	138687	1.56234e+07	697161	182050	128685	291448	7.96641e+06	2.33531e+07	483541	232266	193578	322405	222103	214497	515336	280577	294107	470340	396030	493927	604902	5.17709e+06	1.11791e+07	667383	510486	564401	891841	4.24393e+06	8.02251e+06	1.11403e+06	1.30589e+06	6.55991e+06	2.12496e+07
HC_351_1_1	3944.28	15170.9	13723.3	30449.2	1614.81	17369.3	17415.5	22072.7	21507.2	16471.6	23878.4	35769.6	101952	49675.3	18461.2	57852.1	154739	1.50381e+07	643547	159748	167846	273368	7.71459e+06	2.22899e+07	471379	202417	223131	325485	217297	202885	532265	270080	285521	465293	437396	503826	596382	5.05151e+06	1.06995e+07	690447	525617	564005	925291	4.53869e+06	8.88866e+06	1.17446e+06	1.19183e+06	5.39458e+06	2.05887e+07
HD_351_1_1	25664.4	29543.7	31545.9	44803	60813.4	45005.8	67049.1	33518	58169.9	57748.2	66642.5	46036.1	116178	59809.2	57904.6	100253	178826	1.39481e+07	636315	200116	168685	293272	7.26544e+06	2.06074e+07	445823	249196	204868	333161	247673	264737	546845	303051	325546	497474	441954	546890	638414	4.74096e+06	9.98048e+06	685523	552863	596272	960673	5.47807e+06	8.36369e+06	1.17004e+06	1.17605e+06	5.36502e+06	2.02111e+07
HE_351_1_1	35106.2	61247	73112.8	37048.8	49863.1	69365	73279.5	72273.5	79362.7	81207.2	74356.3	73051.9	131399	90140.6	95408.1	109694	230300	1.35278e+07	569615	199081	189816	340491	7.49097e+06	1.94546e+07	430625	264025	238972	319904	253055	249364	633121	389170	373873	537477	482781	567515	690675	4.79793e+06	9.59686e+06	742484	603872	654986	1.03934e+06	6.10747e+06	6.88428e+06	1.18291e+06	1.3153e+06	5.69027e+06	2.09589e+07
HA_356_1_1	14702.7	30180.2	31767.3	6005.3	28355.4	24285.2	19498.4	10702.5	15073.3	27124.2	9694.67	5180.76	128447	68925.8	41435.2	70540.1	197135	1.5886e+07	783098	185369	183466	356585	7.138e+06	2.43518e+07	608622	255345	238924	346838	230875	232485	368773	266955	291062	451243	406140	490474	628013	5.10104e+06	1.1363e+07	749895	576899	588304	910110	2.99353e+06	1.07415e+07	1.56267e+06	1.07006e+06	4.95125e+06	2.03587e+07
HB_356_1_1	96445.1	88069.6	93651.1	83690.4	79152.8	63809.2	69953.7	81063.1	105892	95232.6	131552	120787	181660	171825	153923	172993	286629	1.52995e+07	816393	257818	229064	421439	6.42819e+06	2.40733e+07	531008	267035	263985	383368	284550	261394	408787	304497	338263	496944	443735	539924	659205	4.82143e+06	1.11198e+07	781738	582530	598732	905395	2.62665e+06	1.11103e+07	1.53647e+06	1.15844e+06	5.65378e+06	2.2129e+07
HC_356_1_1	58408.5	5146.32	47404.1	40185.9	33082.7	62995.4	39999.7	55221	52096.3	71988.5	50897.7	39835.6	131176	124501	61235.9	123683	214851	1.65548e+07	902595	243272	185434	410574	6.63625e+06	2.6329e+07	621382	270675	246317	366236	256515	253025	401385	295837	337881	518057	470479	522580	726639	5.18141e+06	1.20995e+07	856206	616688	638290	956795	2.34481e+06	1.27759e+07	2.01927e+06	1.15811e+06	4.99221e+06	2.13973e+07
HD_356_1_1	27845.2	2791.41	10978.7	11024.9	14383.3	24827.5	4651.36	1125.3	9731.37	11590.6	19521.5	17448.8	78764.7	53157.9	50363.4	23891.3	142698	1.51017e+07	752938	200956	155638	282049	6.59041e+06	2.35806e+07	542390	222468	200811	313534	230370	209548	339315	260115	249277	429272	408206	432326	587032	4.79997e+06	1.0951e+07	714035	549723	533893	816967	2.56682e+06	1.07562e+07	1.42835e+06	1.05028e+06	5.37952e+06	2.1397e+07
HE_356_1_1	106490	97283.7	91294.8	74169.3	85262.4	86667.5	78589.5	95460	111251	96880.1	88195.4	92657.5	159897	138126	114013	163935	297602	1.65281e+07	829003	251097	249440	431545	6.91344e+06	2.60157e+07	558038	258314	253228	358576	280288	248572	397601	293923	290667	504171	456005	525345	671140	5.2149e+06	1.19471e+07	737827	561067	576921	902443	2.42763e+06	1.03026e+07	1.4908e+06	1.26467e+06	6.16747e+06	2.2425e+07
H1_357_1_1	72925.4	58772.4	58312.7	83163.9	64038.7	49997.3	60606.9	89720.9	65714.1	83218.2	70044.7	71185	144612	103148	108785	120584	261241	1.39403e+07	642174	211830	203781	380664	7.37942e+06	2.01898e+07	483934	253773	237567	347574	260439	264137	418846	308522	330209	476445	427290	552037	624825	4.81057e+06	9.77164e+06	730182	584957	640296	982278	4.29045e+06	7.93269e+06	1.25651e+06	1.28305e+06	5.60748e+06	2.08845e+07
H2_357_1_1	-287.385	-15946.4	12308	-11044.5	-7207.38	31306.7	17776.2	-9950.44	7113.69	-3756.31	6824.58	1321.72	76479	14140.6	21879.5	47788.2	155877	1.48904e+07	674740	194083	168187	313977	7.51398e+06	2.18286e+07	557441	242704	194271	311523	202692	204214	394144	250742	240703	438908	402257	467694	615688	5.02903e+06	1.03964e+07	755582	553270	607482	963236	3.8356e+06	9.0792e+06	1.40192e+06	1.12558e+06	5.05803e+06	1.99041e+07
H3_357_1_1	46136.6	54663.4	39039.2	53226	58907.6	28861.1	48351.8	65991.9	60122.7	70480.5	80321.8	59004.5	110329	81160.9	101230	124759	240013	1.6331e+07	862436	224851	228963	399462	6.84105e+06	2.56209e+07	633644	278065	235453	374423	275450	272883	481589	327910	331374	508753	488091	546321	720487	5.2017e+06	1.18751e+07	854228	627774	669227	992451	2.78298e+06	1.15766e+07	1.72471e+06	1.18265e+06	5.00049e+06	2.19071e+07
H4_357_1_1	77459	60256.4	65679.4	64711.9	88586.7	95902.3	98634.2	93812.8	88536.2	102533	85620.4	77031.8	147883	108360	115054	158756	285266	1.45047e+07	635313	240247	240220	408175	8.26455e+06	2.03566e+07	521559	277123	273901	346762	290880	290409	512157	334861	390293	542843	492387	577747	723943	5.23752e+06	9.99459e+06	785476	647083	723485	1.1499e+06	4.97428e+06	8.5975e+06	1.45651e+06	1.2119e+06	4.82148e+06	1.85303e+07
H5_357_1_1	-9786.04	-18080.8	14006.3	-4788.5	14551.7	-23420.1	16723.7	33771.1	16077.1	22177	20953.9	-11605.8	85469.1	29733.9	43543.9	67245	143150	1.41796e+07	566907	173737	137042	305485	7.97993e+06	1.99345e+07	506179	221878	185678	305214	201751	237921	459758	241353	264525	439698	378265	446925	599176	5058036	9.74292e+06	709459	589903	618201	1.04999e+06	5.3821e+06	8.38738e+06	1.30865e+06	1.00466e+06	4.5519e+06	1.87136e+07
HA_354_1_1	45579	41037.8	47694.2	65611.2	58698.4	53992.9	34528.4	50535.8	48548.2	53770	28153.3	36265.4	94613	91291	82891.1	108857	195885	1.55189e+07	766041	223839	162472	340792	6.37975e+06	2.46532e+07	515525	258223	197443	352357	221785	225231	403216	250030	264763	449116	391309	449162	588195	4.78463e+06	1.13129e+07	694416	536761	548374	842231	2.51942e+06	1.271e+07	1.4575e+06	980134	4.79353e+06	2.17852e+07
HB_354_1_1	20074.6	49659.4	50477.8	43496.5	55031.4	54667.9	40637.6	57198.4	75682.9	67745.3	40980.6	43749.9	129143	103524	69446.9	112902	234773	1.66096e+07	864756	238801	195269	358830	6.84052e+06	2.64555e+07	533966	253075	226743	337028	257170	223163	431006	276278	304646	509111	444291	515150	663675	5.17751e+06	12173455	785099	566479	585912	876773	2.35155e+06	1.2496e+07	1.59582e+06	1.06079e+06	5.06615e+06	2.17134e+07
HC_354_1_1	59104.7	49384	42590.1	54443.8	7684.96	32673.4	31323.7	44872.1	52207.3	50384.3	65401.5	57772.2	86851.9	97057.6	74899.6	98461.7	202833	1.59757e+07	785588	211125	176847	318678	6.71353e+06	2.52339e+07	517353	248397	222155	359888	235038	221295	411247	272094	248710	467496	403080	437281	599007	4.9829e+06	1.1604e+07	693860	513618	542502	845366	2.45849e+06	1.27716e+07	1.44186e+06	999848	4.95315e+06	2.17437e+07
HD_354_1_1	59544.3	57892.1	39776.8	55223.3	55298.5	49794.4	52169.4	59293.6	70918.8	57996.9	59236.1	57790.2	102033	102920	92405.9	122279	251651	1.57996e+07	821964	244104	178769	352539	6.37371e+06	2.52698e+07	529978	279932	243509	342738	259749	228484	400837	288922	315674	504441	458332	528315	654767	4.90862e+06	1.16007e+07	750552	560317	570848	855347	2.37247e+06	1.1886e+07	1.49044e+06	1.09465e+06	5.39627e+06	22207998
HE_354_1_1	11270.3	28443.8	-968.669	25701.4	28843.2	2774.22	28785.9	31941.4	23683.3	31174.3	21944.2	19491.4	70750	62985.2	33028.3	87760.4	160015	1.58658e+07	824655	199978	137908	304161	6.67409e+06	2.50638e+07	586002	258612	213362	332371	228073	211877	385806	292875	302401	460288	417927	493908	620615	5.00338e+06	1.15938e+07	768437	554170	569183	831860	2.55706e+06	1.11187e+07	1.46882e+06	1.04496e+06	5.43471e+06	2.17391e+07
HA_355_1_1	11068.1	37495.4	28891	22603.4	15692.3	18722.8	11761.2	5339.85	-401.002	-9110.38	16355.9	43266.8	77478.9	57476.2	39822.5	52750.3	150520	1.6188e+07	748649	183565	141977	297622	7.21196e+06	2.49993e+07	531218	225210	197177	317018	205963	214228	386646	244296	281365	463985	401333	439823	602321	5.12787e+06	1.16817e+07	741593	533937	575001	897829	3.24372e+06	1.15444e+07	1.3837e+06	1.03229e+06	4.98686e+06	2.1069e+07
HB_355_1_1	61605.4	14503.9	36776.2	66427.6	31814.6	39725.2	55389.1	25998.7	36135.1	39164.9	79729.8	28877.5	114451	70871	71532.8	112812	210859	1.56174e+07	860870	233806	204440	329079	6.01532e+06	2.52814e+07	543413	252372	235017	341200	264110	269863	453730	292962	304703	527542	469057	510274	669022	4.81531e+06	1.15572e+07	772607	584555	557582	864486	2.21233e+06	1.13416e+07	1.52612e+06	1.1645e+06	6.03825e+06	2.3081e+07
HC_355_1_1	25203.6	8464.45	-13939.1	20545.2	2261.42	-2039.62	33431.7	25162.1	27834.5	47984.1	14718.1	41194.4	78670.4	53818.7	49345	77473	186305	1.57126e+07	750493	171974	156859	278906	6.57918e+06	2.48271e+07	487586	212757	221355	320297	216758	209458	373857	251900	266320	415698	377295	420183	563870	4.92682e+06	1.14253e+07	658992	475167	502801	847931	2.81317e+06	1.29838e+07	1.39539e+06	992904	4.92808e+06	2.19404e+07
HD_355_1_1	36807	12547.4	45480.9	14203.7	19050.9	45983.6	22730.3	49711	53955.3	67643.1	47554.4	44960.5	98924.3	95455.4	78578.6	110700	232705	1.62313e+07	790155	229982	184256	366569	6.93401e+06	2.53877e+07	539696	268385	233452	338890	222199	254949	404531	307592	279014	479457	428607	513897	698650	5.17228e+06	1.17239e+07	766041	549311	580393	909183	2.82345e+06	1.27652e+07	1.60794e+06	1.09831e+06	5.07466e+06	2.16485e+07
HE_355_1_1	29674.4	40981.1	20118.7	28403.4	46569.1	42713.8	52493.1	47994.7	37109.7	32035.3	23429.9	31922.1	79043.6	93499.4	76912.8	101043	171580	1.52944e+07	770813	190451	159851	313418	5.7195e+06	2.48448e+07	531723	225015	212985	352924	244188	243214	417890	310962	326237	511445	469874	547506	688109	4.75531e+06	1.1288e+07	776848	574126	583027	864472	2.23057e+06	1.32282e+07	1.67506e+06	1.10069e+06	5.31075e+06	2.33343e+07
HA_337_1_1	118486	70241.5	84162.6	94153.5	87064.8	121978	73245	98869.2	97070	141488	123595	118131	191417	174026	158936	184888	270052	1.3729e+07	732988	254949	235190	442808	6.21291e+06	2.10731e+07	561183	282216	283466	397783	298234	322381	518703	352571	406239	584472	530578	562827	750003	4.58178e+06	9.93917e+06	827528	680933	735604	1.10122e+06	2.95295e+06	1.12921e+07	1.79563e+06	1.29007e+06	5.24978e+06	2.09171e+07
HB_337_1_1	93231.7	101056	90292.5	110178	86942.2	86633.1	107503	82679.9	85223.4	114434	108075	93205.9	148693	116302	134037	154801	278668	1.4014e+07	786881	256341	247287	421525	6.44645e+06	2.13941e+07	593759	313706	290892	395632	300865	289784	540599	363067	395911	588887	561906	600312	804345	4.73196e+06	1.01425e+07	865803	743463	757804	1.15182e+06	3.22649e+06	1.17985e+07	1.94734e+06	1.29204e+06	4.7855e+06	2.01124e+07
HC_337_1_1	46357.4	20825.2	49387.4	58028.4	33500	51003.5	91605.5	59281.3	45070	83448.1	57224.9	67966.8	107687	90887.8	83338.6	110427	214538	1.33193e+07	622591	196702	180079	327605	6.45041e+06	2.00895e+07	490087	250235	254974	369311	242517	269565	448705	326892	320700	507494	445754	511918	638496	4.46188e+06	9.56602e+06	694176	557321	618196	973921	3.14203e+06	1.0726e+07	1.44298e+06	1.11914e+06	5.1803e+06	1.99658e+07
HD_337_1_1	59894.6	60348.2	44553.3	65895.1	38958.3	49676	59652.6	75518.6	76615.1	86103.3	84176.3	67129.6	123658	105383	115821	149900	228001	1.24295e+07	643242	218269	198542	339344	5.81332e+06	1.88959e+07	456545	249227	224519	339113	269837	283177	436361	310851	318617	470752	444610	484351	627476	4.18941e+06	8.96324e+06	724649	589492	617339	1.04117e+06	3.58192e+06	1.14522e+07	1.50492e+06	1.14008e+06	4.98709e+06	2.05347e+07
HE_337_1_1	75036.1	78930	61578.1	46170.6	67440.7	60141.3	79291.6	60315.9	80083.1	87969.2	83491.8	74906.5	137763	130873	117715	127128	262426	1.37554e+07	668709	253298	209607	385161	6.34023e+06	2.09881e+07	523915	253805	237138	351555	255990	274292	442785	326978	341521	491988	472331	540641	689160	4.56728e+06	9.85313e+06	772106	620525	660692	1.03438e+06	2.94867e+06	1.23567e+07	1.8369e+06	1.17236e+06	4.82672e+06	2.03042e+07
HA_336_1_1	30208.2	49268.6	38651.9	42461.7	35443	55650.5	44669	35172.4	54444.9	76619.3	56677.7	37337.3	107772	79437.9	65653.6	99803.3	237690	1.38951e+07	679746	177096	183740	349720	6.13678e+06	2.15427e+07	476068	254161	245416	339996	271301	245197	390402	295599	309472	477049	427558	522882	647379	4.49162e+06	1.01107e+07	726505	569690	629101	995596	3.05083e+06	1.16684e+07	1.60066e+06	1.0867e+06	5.13922e+06	2.09125e+07
HB_336_1_1	53833.7	43121.2	21236.8	55689.4	45888.7	60642.3	54121.7	48747.4	47715.8	51623.3	69098.6	62512.4	134313	96046.2	96629.9	97860.9	214094	1.38528e+07	664956	198558	172902	314489	5.92212e+06	2.17656e+07	459608	220330	204540	316321	228437	209016	379785	277854	264206	432792	413625	464398	608960	4.41706e+06	1.01518e+07	678386	516344	555581	925283	3.00196e+06	1.24467e+07	1.43409e+06	1.10097e+06	5.05603e+06	2.13162e+07
HC_336_1_1	63656.9	58371.2	52513.1	36108.6	47231.7	57175.3	57163	58733	60278.3	73504.8	79050.1	62552.5	120952	89499.1	78339.8	114372	228002	1.39442e+07	648538	199481	183108	331995	6.68225e+06	2.09279e+07	478791	243708	226893	327955	238111	223131	375476	255061	285195	444426	380621	446808	577462	4.59965e+06	9.89589e+06	665890	542876	573141	973586	3.78564e+06	9.97568e+06	1.37063e+06	1.10062e+06	5.30981e+06	2.02274e+07
HD_336_1_1	52700.2	31972.5	34867	64709.5	25055.4	74517.7	82797.6	68483.8	75171.2	62198.8	66716.1	65845.1	149487	100950	112664	128396	213852	1.33111e+07	629353	192853	201023	340526	5.95201e+06	2.05646e+07	458713	228462	223428	344499	256848	257917	435815	322783	341237	489927	438302	489602	626839	4.37688e+06	9.67032e+06	716633	578660	592354	960698	3.2464e+06	1.12608e+07	1.44139e+06	1.10673e+06	5.41517e+06	2.15269e+07
HE_336_1_1	50606.7	50472.8	81744.6	59774.8	96538.5	63713.2	76858.2	84963.1	80176.6	118559	103222	96234.2	134587	123376	120799	143759	251157	1.45953e+07	745479	252923	203403	394640	5.96856e+06	2.31191e+07	535717	252677	242732	359878	287389	268991	430912	337108	324405	516063	504255	562490	691596	4.67326e+06	1.0682e+07	787185	605724	665395	991117	2.6469e+06	1.2084e+07	1.77095e+06	1.1906e+06	5.47814e+06	2.19982e+07
HA_335_1_1	63579.2	52621.1	60274.5	54309.4	48912.4	59128.5	75961.1	70713.2	83221.4	60842.9	80372.3	58866.2	141305	91084.6	102917	126861	230698	1.27812e+07	583168	207297	194445	341603	6.69125e+06	1.87839e+07	438266	236366	235559	362373	265882	262405	503853	293074	317414	514534	441104	509574	658871	4.41909e+06	9.10061e+06	694554	605226	637759	971863	3.78573e+06	1.03134e+07	1.36591e+06	1.15372e+06	5.2018e+06	1.96813e+07
HB_335_1_1	26554	11940.1	4654.41	28124.8	7423.65	21504	30187.6	29888.1	10386.6	47207.1	-4718.26	-5269.82	66098.6	67802.5	30355.9	48852.5	130642	1.30626e+07	662931	151332	131097	252009	5.45899e+06	2.07117e+07	432061	178572	195195	278987	191642	197448	389650	201441	226882	380265	340737	363242	512052	4.06459e+06	9.58704e+06	603632	484377	512540	845531	2.74286e+06	1.31767e+07	1.49555e+06	941544	4.77167e+06	2.08119e+07
HC_335_1_1	8169.88	-17723.8	26420.6	17863.4	41366.6	31946.9	23925.1	39970.4	45571.9	24792.4	1182.1	-277.352	73814.7	20258.2	35070.8	64615.9	157816	1.44961e+07	701453	167237	141035	278146	6.4301e+06	2.24971e+07	501000	203355	185777	328567	203907	187721	419424	218133	239088	422379	374271	403456	570002	4.63884e+06	1.04446e+07	643885	512104	537855	903346	3.28155e+06	1.14156e+07	1.38736e+06	1.03499e+06	5.31193e+06	2.08079e+07
HD_335_1_1	547.865	-4247.27	2058.23	-24775.3	-19900.3	19905.5	11474.4	-4844.86	5432.8	-15198.4	5931.68	-4342.38	34249.5	-7614.19	16566	29354.2	104908	1.42265e+07	591066	137170	97764.7	250084	6.59547e+06	2.16953e+07	469335	194941	155913	291229	188768	184468	430222	223483	236503	412297	349152	420439	552211	4.58109e+06	1.01875e+07	648056	476074	526267	882859	3.30452e+06	1.24752e+07	1.41684e+06	955778	4.72716e+06	2.03245e+07
HE_335_1_1	54185.9	61950.6	52613.8	69725.9	59052.6	67242.9	65161.3	64087.2	88694.9	88961.8	114399	102955	132584	108331	109925	122326	259335	1.42254e+07	748015	222698	219542	373834	6.56291e+06	2.17011e+07	507557	242759	243398	352871	311107	294062	486213	320877	335852	523382	448255	527675	684181	4.64874e+06	1.03239e+07	765677	618015	657701	1.08481e+06	3.32498e+06	13519150	1.7387e+06	1.09901e+06	4.5319e+06	1.91201e+07
HA_334_1_1	39571	39620.4	68357.4	71460.2	31931.2	46363.9	53067.2	56100.6	60682.6	73307.7	67461.1	73904.7	123618	105209	51108.5	95925.1	226234	1.34238e+07	734655	203090	191354	332865	5.57984e+06	2.1313e+07	515176	238284	241802	328270	241954	236498	438036	293701	305114	478759	431271	510847	618951	4.27784e+06	9.91825e+06	745474	594742	586895	957368	2.61122e+06	1.11652e+07	1.60604e+06	1.16676e+06	5.7263e+06	2.17129e+07
HB_334_1_1	43550.6	29391.6	44209.6	57939.8	33808.9	62432.1	61781.6	62435.1	32619.7	58916.5	45737	45494.6	108764	89051.1	81360.5	99111.1	197840	1.33246e+07	651367	185432	167962	297347	6.46793e+06	2.01367e+07	453035	215856	202582	314043	222903	229475	386487	269639	274002	434653	362483	451078	560543	4.43512e+06	9.51625e+06	684753	540576	557815	948910	3.31296e+06	1.32775e+07	1.58097e+06	991228	4.62845e+06	1.90606e+07
HC_334_1_1	20490.6	22837.2	24515.6	16103.8	18093	-10883.1	40988.1	3002.66	32623	43937.8	33054.6	28021	91484.2	51383.4	45547.1	78374.7	139724	1.30817e+07	548510	168778	122304	254296	6.58007e+06	1.9499e+07	385970	156625	155494	263255	197847	155671	336036	167464	177276	354191	317066	360083	454342	4.26922e+06	9.30508e+06	535068	436079	451090	814010	3.42236e+06	1.0948e+07	1.18218e+06	924163	4.9296e+06	1.94542e+07
HD_334_1_1	22853.4	20082.2	38443.1	12272.1	37146.6	46686.2	42939.5	35239.1	43425.4	32986.8	40429.8	50766	102279	68888	36709	66086.4	166818	1.38215e+07	630629	175610	128176	289941	6.37061e+06	2.11906e+07	449056	181832	198927	307885	218039	199752	348799	223106	222675	404579	348574	411253	520774	4.48461e+06	9.91988e+06	633671	476334	516183	878013	3.20338e+06	1.16926e+07	1.37762e+06	976691	5.01746e+06	2.07672e+07
HE_334_1_1	42664.5	27631.9	32230.4	19569.8	42854.3	37432	42576	36767.3	24449.1	52480.5	52175.3	53227	110582	85729.4	83805.4	86306.5	164103	1.32302e+07	634647	170087	142813	289939	5.84811e+06	2.06228e+07	419533	171898	169433	291410	210839	191197	345668	215596	224497	382518	321602	389489	510682	4.20366e+06	9.61537e+06	590189	420883	495747	797525	3.1021e+06	1.21346e+07	1.2637e+06	938378	5.07756e+06	2.12106e+07
H1_341_1_1	27208.4	36687.5	57452.8	29986.2	48800.8	69882.2	70966.4	41743.6	49152	44061.6	72466.8	39281.4	122431	81914.1	68846	124899	218880	1.23206e+07	467887	195335	178498	329063	7.85744e+06	1.64297e+07	442592	253760	260088	359818	253790	278140	484660	358567	404083	545806	481882	636454	709388	4.73038e+06	8.36558e+06	775857	638487	730606	1.14348e+06	6.10443e+06	6.39918e+06	1.32341e+06	1.41847e+06	5.4639e+06	1.88254e+07
H2_341_1_1	84934.5	63328.2	38180.5	68827	48834	82032.4	83818	110062	77424.3	85989.1	68653.4	102798	171407	106171	128048	143129	271918	1.3279e+07	527853	218673	228188	412215	9.02897e+06	1.71625e+07	498362	302574	267809	388580	314463	326854	564456	419306	427279	614937	556800	691529	770665	5.31488e+06	8.8362e+06	881994	721766	812095	1.30613e+06	6.44041e+06	5.88947e+06	1.40346e+06	1.43374e+06	5.26063e+06	1.78139e+07
H3_341_1_1	55685	62751.3	110218	82568	79645.6	69686.9	87091.8	97779.1	113250	104316	65289.8	117727	156451	130809	123325	140653	311510	1.34369e+07	555719	257451	238627	472383	9.06024e+06	1.73659e+07	494167	289075	314707	399731	327295	342310	570374	446479	449689	667477	599137	706197	853690	5.43045e+06	8.91384e+06	899984	769972	845752	1.3243e+06	6.37365e+06	5.51838e+06	1.44226e+06	1.52158e+06	5.75981e+06	1.80686e+07
H4_341_1_1	-5551.63	10468	19647.8	-273.875	-1919.82	13563.5	20161.1	-2461.74	25204.4	42581.9	34752.9	22361.8	98489.1	56627.7	37106	78454.2	169397	1.37109e+07	588836	197730	192634	365136	8.8009e+06	1.82897e+07	557189	286671	269976	368025	279930	304904	536669	390186	414710	593325	555179	644772	796744	5.36993e+06	9.28936e+06	892187	750604	812083	1.21856e+06	5.08279e+06	7.7901e+06	1.57317e+06	1.29471e+06	4.6582e+06	1.70176e+07
H5_341_1_1	10041.1	42356.3	46038.7	26316.8	29530.5	36441.9	9307.56	37469.7	25924.9	39052.7	19275.6	59127.2	95932.9	38964.6	53712.5	109660	190774	1.32114e+07	555204	185406	167393	335447	8.3537e+06	1.77598e+07	482822	248473	233330	366510	267108	265704	506067	366921	408727	571601	525423	636231	750243	5.0496e+06	8.99384e+06	801016	675461	777667	1.17225e+06	5.24646e+06	8.24653e+06	1.4987e+06	1.21839e+06	4.78665e+06	1.74092e+07
HA_340_1_1	60671.9	71847.6	80361.8	75947.7	72086.9	86255.4	82786.3	95032.3	109641	88410.7	119629	82463.5	180448	126897	131022	159506	298309	1.40457e+07	600892	249642	232305	456285	8.95199e+06	1.87692e+07	551901	287000	295014	429722	311784	312253	617269	408383	424133	624404	542504	663684	829516	5.42943e+06	9.46652e+06	876295	752773	787488	1.27857e+06	4.93752e+06	7.69856e+06	1.52925e+06	1.28696e+06	4.83189e+06	1.69568e+07
HB_340_1_1	54682.4	45330.5	36481.6	47867.8	67596.9	80962.9	41389.8	41197.8	65276	82864.1	62268	57862.4	126412	102166	102752	140444	291257	1.44012e+07	634191	224749	232273	474123	9.105e+06	1.9227e+07	611660	311358	304032	403482	339482	319018	614182	434340	451155	664031	581429	660154	894191	5.6344e+06	9.68877e+06	937300	795546	863874	1.34937e+06	4.89654e+06	8.57639e+06	1.7391e+06	1.30986e+06	4.48281e+06	1.6685e+07
HC_340_1_1	63446	70643.1	65291.1	62720.5	57064.5	72856.3	72300.1	78811.1	75300	94174.4	92316.5	90505.4	148301	99109.1	128397	171311	341541	1.54158e+07	712000	284091	300535	543348	9.80482e+06	2.04057e+07	668636	356451	338495	428664	330257	385369	741118	486084	511210	723650	684024	780987	1.00622e+06	6.06994e+06	1.0336e+07	1.06039e+06	894237	942531	1.49225e+06	5.22273e+06	8.34575e+06	1.84595e+06	1.42145e+06	4.51376e+06	1.67331e+07
HD_340_1_1	79611.6	44539.9	64713.9	59784.4	85428.7	71903.9	78989.9	66978.5	80243.5	86712.5	94629	106712	170841	113191	121107	145877	322664	1.53401e+07	690243	261499	281542	523806	9.6556e+06	2.04381e+07	671286	336103	313845	438096	339512	351213	621795	418926	459102	673802	624320	676888	945806	6.07316e+06	1.02009e+07	967477	835617	919696	1.44315e+06	5.45593e+06	8.37664e+06	1.7177e+06	1.40246e+06	4.40928e+06	1.68232e+07
HE_340_1_1	62188.9	53861.9	91350.8	69830.7	82529.5	84292.3	89290.8	83039.1	88349.8	77896.3	95823.1	81936.5	171929	123086	115049	150188	300120	1.52329e+07	712314	244459	258876	498502	8.67252e+06	2.13508e+07	602925	310446	281389	404503	309023	297669	539621	358781	380537	561216	535116	588688	798647	5.53419e+06	1.041e+07	844826	723110	753369	1.2343e+06	4.75083e+06	8.8887e+06	1.60099e+06	1.22932e+06	4.75338e+06	1.83064e+07
HA_339_1_1	-4891.91	-13251.3	13846.5	5758.25	1071.15	19897	42350.3	-925.875	21390.5	22648.4	24551.4	20109.9	89013.5	89748.3	40874.4	82345.2	193359	1.42967e+07	613641	177149	159812	375523	7.85035e+06	2.04381e+07	535531	235909	204343	340793	214960	220552	409255	247951	299660	474409	416976	503874	647210	5.03156e+06	9.89454e+06	726974	613976	637183	1.04238e+06	4.16622e+06	9.93847e+06	1.56914e+06	1.15191e+06	4.6967e+06	1.84809e+07
HB_339_1_1	53185.8	70226.4	43898.4	60938.1	45033.3	77269.3	77420.4	62396.2	69431.2	75668.1	73180.3	87375.8	131767	107683	76883.5	157975	249219	1.39998e+07	679363	218787	242878	412055	7.38681e+06	2.02483e+07	526580	277180	269223	378017	264047	282089	470469	355553	376197	557905	511885	611513	736203	4.85075e+06	9.85747e+06	800013	650751	734138	1.14279e+06	4.01047e+06	1.08805e+07	1.67985e+06	1.24396e+06	4.8311e+06	1.88267e+07
HC_339_1_1	57422.8	68470.2	48323.6	46337.8	25690.3	54367.6	67280.6	76459.1	47264.3	71269.8	80052.2	72265.2	153982	98053.4	92789.9	124001	267949	1.56017e+07	686748	274825	237563	389131	8.20429e+06	2.26502e+07	579530	289503	275087	416418	290618	317091	514142	365463	389749	578231	523313	596381	768167	5.40728e+06	1.09523e+07	819874	686807	729062	1.14379e+06	3.72276e+06	1.16561e+07	1.72721e+06	1.2238e+06	4.80555e+06	1.88519e+07
HD_339_1_1	44873	20051.3	29545.3	45531.4	40440	43710.1	48894.7	27043.7	46796	59138.8	51389.9	18462.7	102260	81672.1	48085.4	75601.4	187631	1.4631e+07	647076	198817	162227	372749	7.25837e+06	2.17436e+07	531340	233145	247532	305761	195820	210245	378845	250988	253403	447506	393844	465779	612015	4.88699e+06	1.03294e+07	703130	542703	611476	976338	3.62879e+06	9.2434e+06	1.44979e+06	1.15417e+06	5.35807e+06	1.97916e+07
HE_339_1_1	33448.9	26025.6	24156.6	26585.7	1166.05	30668.1	21024.5	14593.3	24710.4	36886.4	27671.8	35123	109285	79132.1	59638.1	79105.4	199856	1.41861e+07	641302	201239	146975	368142	7.86384e+06	2.01933e+07	545826	281681	259742	329492	231492	246795	457285	309231	351129	527535	506407	573000	710021	5.05644e+06	9.88252e+06	794008	664680	679651	1.09177e+06	4.19284e+06	9.02274e+06	1.53929e+06	1.22599e+06	5.27053e+06	1.90793e+07
HA_338_1_1	62973.6	61848.6	93680.4	103831	77281.6	99127.2	103411	115314	103224	101321	101189	96586.1	171565	138240	129264	161157	285844	1.38536e+07	665634	248637	230038	420806	7.20799e+06	2.02002e+07	511778	297690	289774	365418	309481	315147	572790	429281	447265	626515	566481	636609	802391	4.92287e+06	9.80259e+06	832967	714924	789819	1.18208e+06	4.28111e+06	1.0675e+07	1.64891e+06	1.2887e+06	5.03562e+06	1.97094e+07
HB_338_1_1	8087.84	44694.6	30727.3	14631.3	12747.6	4923.92	52099	-5779.84	15383.5	17845.3	25776.7	20134.2	69060.7	66270.7	62138.9	76665.8	190735	1.32215e+07	658616	208904	158183	310124	6.39896e+06	1.98055e+07	489188	233579	227281	328631	250265	243494	447819	305324	327181	480706	450644	478789	633511	4.46145e+06	9.47554e+06	728801	586863	612072	1.02505e+06	3.5283e+06	9.48354e+06	1.5109e+06	1.23521e+06	5.5187e+06	2.05786e+07
HC_338_1_1	33916.7	40507	32872.5	11941.3	4610.22	27136.2	34834.5	22060.6	42487.3	33107.2	19364.4	70301.3	108458	68004.8	58575.4	74379.8	207356	1.46967e+07	675195	194529	174093	323129	7.61363e+06	2.15313e+07	548083	257292	240712	360702	255770	252559	474016	299315	326772	509578	430930	507109	698870	5.05533e+06	10326054	749670	575565	643042	1.07089e+06	4.04169e+06	1.08216e+07	1.52845e+06	1.14263e+06	4.90075e+06	1.9546e+07
HD_338_1_1	23195.2	30695.4	911.901	31040.4	42253.4	15284.6	37040.7	26883.1	48203.8	54024.5	23744.7	35670	104450	53885	67905.9	96090.8	180670	1.46846e+07	625025	186831	155092	326818	7.76232e+06	2.14893e+07	499918	233612	239456	362486	239095	249024	473582	350431	310100	535077	471593	536999	684459	4.96327e+06	1.0482e+07	776109	594288	639839	961435	3.04076e+06	1.05533e+07	1.54407e+06	1.10146e+06	5.02876e+06	1.86698e+07
HE_338_1_1	7830.91	-8526.99	10800.3	1422.81	21674.9	7539.98	235.327	-17011.7	-5613.84	31497.5	-14485.5	7831.63	38551	16834.5	2756.85	31091.7	116788	1.23548e+07	517361	141650	113282	235118	6.51973e+06	1.80446e+07	416660	197092	190421	299432	219932	187422	394574	248680	290222	443284	389052	473167	582648	4.28345e+06	8.81363e+06	668293	544704	582122	939809	3.95306e+06	1.03341e+07	1.43043e+06	1.01617e+06	4.70843e+06	1.86956e+07
HA_345_1_1	58763.9	56835.4	76222	69983.2	66070.7	82541	79674.3	80803.3	59609.7	81447.9	78997.5	103769	155918	135175	108764	149548	278307	1.5024e+07	725062	234453	205200	382704	6.83773e+06	2.29911e+07	528343	262834	243780	364272	244582	258376	418077	298621	313382	491478	460587	527033	678209	4.90017e+06	1.07623e+07	754010	617101	657090	1.04734e+06	3.11829e+06	1.20349e+07	1.76054e+06	1.16846e+06	5.04392e+06	2.04399e+07
HB_345_1_1	36570.6	71612.4	40329.9	77886.9	45180.3	68620.7	77258.3	64671.5	73125.3	92158.7	71760.4	72949.5	181128	101339	110189	144134	272280	1.63372e+07	782341	251548	238031	433047	7.37579e+06	2.49171e+07	604000	269647	247129	368977	262803	240834	396954	299176	314771	483055	457290	529793	700079	5.29355e+06	1.15858e+07	798661	600318	645924	1.03784e+06	3.04039e+06	1.10496e+07	1.72781e+06	1.1214e+06	5.20144e+06	2.10258e+07
HC_345_1_1	102235	96351	96677.7	103752	88562.8	102914	107350	125351	110159	161614	143012	117826	185551	150954	181547	208741	341391	1.5607e+07	809480	299307	280931	483261	7.51593e+06	2.34845e+07	579011	289387	303271	435342	336147	322685	501033	399738	443001	608256	573157	634604	818919	5.28496e+06	1.11585e+07	873230	696541	769462	1.16521e+06	3.36721e+06	1.16795e+07	1.84499e+06	1.28797e+06	5.16441e+06	2.04009e+07
HD_345_1_1	56824.6	38187.1	48022.1	36525.5	86792.8	63360.9	66221.4	62788.1	59175.5	83795.5	70917.7	59202	118280	97406.9	94502.4	140188	247082	1.51872e+07	708009	233935	204851	383304	7.36266e+06	2.28649e+07	536026	269470	250129	367991	300840	280415	423704	311151	358019	500663	471927	537166	675343	5.07064e+06	1.08727e+07	755660	621383	670323	992598	3.2608e+06	1.139e+07	1.54341e+06	1.10616e+06	5.27741e+06	2.06549e+07
HE_345_1_1	26048.3	15942.8	19735	17924.5	18228.3	12805.9	29551.6	22927	28942	39723.4	9494.17	9573.39	75145.9	64384.5	18763.3	76108.7	152618	1.5066e+07	758330	173430	155690	330252	6.73544e+06	2.33548e+07	557639	257955	243039	348758	261853	228726	394110	280658	294219	468322	473612	495430	661205	4.86078e+06	1.09387e+07	774081	591095	627319	942469	2.7291e+06	1.13309e+07	1.71012e+06	1.10245e+06	5.18397e+06	2.06709e+07
HA_344_1_1	-11121.4	2950.83	8560.1	-17836.2	-12238.8	11963.1	-4514.78	2073.61	-10482.9	-11009.7	-3728.25	-4680.08	63075.5	36767.1	298.064	23132.5	140338	1.63907e+07	759702	183043	111463	302113	7.52205e+06	2.49765e+07	570628	230102	152825	295892	182957	180774	341227	222219	220581	412198	350930	347573	534022	5.22821e+06	1.15964e+07	709181	477396	525244	883951	2.96829e+06	1.01947e+07	1.48562e+06	1.01829e+06	5.01946e+06	2.00174e+07
HB_344_1_1	33370.2	28514.4	41563	61605	31620	69476.4	43491.8	31230.8	54797.1	51660.5	76855.4	55381.4	133046	99886.6	109670	110960	262082	1.53599e+07	791177	256998	218832	407380	6.95027e+06	2.33304e+07	604344	268817	201358	361906	239242	238962	405787	247028	286103	466427	411796	485915	647667	4.9835e+06	1.09053e+07	787762	601153	629954	1.08824e+06	3.10391e+06	1.08768e+07	1.82556e+06	1.14324e+06	4.80201e+06	2.00154e+07
HC_344_1_1	72867.3	67767.3	76709.7	56658.8	65790.6	82305.7	87043.2	53824	80818.5	89792.6	72247.5	72698	147977	116614	128873	121428	262165	1.47727e+07	688130	230146	178995	338635	6.5574e+06	2.29023e+07	441127	230003	240395	329628	236141	220311	387248	265023	290174	447306	389314	464749	587333	4.70707e+06	1.06565e+07	656693	486265	529595	897567	2.97996e+06	1.16745e+07	1.44615e+06	1.04452e+06	5.15768e+06	2.09593e+07
HD_344_1_1	16319	34714.5	19584.4	28837	31159.8	27255	27485.1	25407.2	46184.2	29466.9	41759.8	12344.6	104626	59804.1	53176.1	71956.4	202148	1.62237e+07	738596	216650	166607	349282	7.75815e+06	2.44792e+07	548535	265026	225384	342318	230680	190604	398286	263421	259050	429996	409741	455966	627587	5.26496e+06	1.15598e+07	730487	524885	595319	949045	2.91363e+06	1.06643e+07	1.54867e+06	1.03654e+06	4.96469e+06	1.98547e+07
HE_344_1_1	42029.9	31179.5	41867.7	27825.2	17243.2	48625.1	23449.4	63147.1	33604.5	59111.6	61747	35775.6	98298.6	78261.4	52380.7	105243	219150	1.49912e+07	703225	200062	170749	326209	6.7838e+06	2.31053e+07	480721	228106	218419	325729	269571	210766	374411	255356	250769	424093	374307	463069	572577	4.7841e+06	1.08209e+07	683634	490114	546333	904942	2.79893e+06	1.18222e+07	1.53846e+06	1.04476e+06	4.85404e+06	2.04891e+07
H1_343_1_1	46479.6	51766.2	65986.4	83350.2	62755.4	75771.1	49374.1	78504.8	82602.5	83397	121227	68696.3	146936	92713.3	115970	156189	275540	1.4784e+07	635212	210829	216240	412096	8.5461e+06	2.07456e+07	526139	260406	252914	385789	289914	277871	511664	340794	377576	582469	539652	601863	790645	5.34541e+06	1.0225e+07	820919	680714	744750	1.19614e+06	4.59284e+06	8.64148e+06	1.50831e+06	1.25658e+06	4.96205e+06	1.87998e+07
H2_343_1_1	48756.8	59617.7	63944.2	64066.7	57370.7	47149.6	69962.1	56814.3	49532.3	79252.6	70157.7	86715.6	131441	105332	99302.6	131365	267037	1.74131e+07	984466	276329	245320	437390	6.87709e+06	2.78074e+07	684886	287111	254622	388257	250385	243164	451320	288641	314653	485403	461399	500204	731813	5.35052e+06	1.27179e+07	871132	611305	628693	1.01121e+06	2.3609e+06	1.08129e+07	1.88173e+06	1.17533e+06	5.45493e+06	2.19128e+07
H3_343_1_1	25099.9	7003.34	26405.9	33659.6	17861.4	33990.5	11244.2	48019.9	24792.9	37106.5	31038.4	29300.7	91039.6	52158.6	49549.8	84434.4	183802	1.44739e+07	621179	205540	175805	311760	7.89151e+06	2.07663e+07	506005	242104	218883	305085	207444	224501	448892	273782	289177	487720	417361	469812	635869	5.06008e+06	1.00364e+07	721072	535644	645277	1.04282e+06	4.11475e+06	9.61817e+06	1.42003e+06	1.04667e+06	4.77296e+06	1.90626e+07
H4_343_1_1	40949	86559.8	56537.8	60791.1	50791	61362.1	67415.9	72110	75939.6	69311.8	89169.7	65712.8	139960	105064	109568	119586	249362	1.60646e+07	697629	258059	224607	403239	9.02701e+06	2.27939e+07	567551	260630	251668	399038	288467	257947	530121	378688	356345	592191	524988	586538	789562	5.70106e+06	1.11421e+07	832293	710466	764371	1.17529e+06	4.11569e+06	1.0323e+07	1.59231e+06	1.19855e+06	4.50009e+06	1.87113e+07
H5_343_1_1	9110.78	18446.7	30961.2	28865.5	31181.1	54660.8	44380.4	37504	55986.8	38921.3	32790.1	35392.6	118811	79037.9	47181.3	91503.3	177752	1.45907e+07	587743	180842	164280	324178	8.76826e+06	2.00442e+07	482819	272127	240533	329335	244870	230066	474360	342018	346890	503634	460311	550476	722241	5.34326e+06	9.96028e+06	782010	644752	685229	1.12958e+06	4.73865e+06	8.95543e+06	1.43871e+06	1.08734e+06	4.60032e+06	1.78788e+07
HA_342_1_1	53168.9	82304.9	95896.8	90830.7	63236.1	59287.6	79526.3	76203	86498.7	91459.6	91529.7	81478.6	145775	126897	133024	143724	221303	1.44142e+07	707707	232512	220451	404210	7.24799e+06	2.13848e+07	499916	241573	251293	381884	270154	260530	382450	299703	344888	517739	475860	550787	650506	4.90452e+06	1.01933e+07	751408	595845	638817	1.02286e+06	3.51647e+06	1.07747e+07	1.58012e+06	1.10958e+06	5.14106e+06	1.99869e+07
HB_342_1_1	-2582.21	25721.3	-4464.95	18615.5	2430.25	49830.3	23879.1	29297.9	46750.9	42754.3	33513.3	-4874.56	84571.2	67234.9	70850.5	59636.6	165349	1.53615e+07	830628	196887	157916	347178	6.53455e+06	2.40934e+07	587335	242545	201703	304196	235739	246790	345985	300785	301493	478791	426486	513016	658067	4.86356e+06	1.12157e+07	811283	609674	641870	985750	2.79682e+06	1.10637e+07	1.72694e+06	1.1565e+06	5.58039e+06	2.17079e+07
HC_342_1_1	26518.1	18012.6	-5834.72	-7197.86	10944.8	1351.72	39791.4	4984.35	12543.6	27983.2	32126	13445.3	59362.6	79332.9	12312.5	43527.8	151885	1.72412e+07	969570	205988	143900	320520	6.48092e+06	2.81573e+07	627763	266587	236011	341147	237450	230563	331370	267952	279076	467540	430401	487150	628825	5.17951e+06	1.27535e+07	820371	548924	561583	861806	2.05255e+06	1.15553e+07	1.83777e+06	1.09866e+06	5.69922e+06	2.26391e+07
HD_342_1_1	10302.9	35760.6	41312.7	40500.5	37102	18844.1	40217.2	12689	23057.3	35315.3	38191.9	50551.8	90764.6	77911.1	48912.2	67224.9	174012	1.4801e+07	676444	188114	163851	336250	7.16424e+06	2.22157e+07	499615	232024	226872	315669	219118	207749	307966	261085	282752	416097	380363	450721	608774	4.86578e+06	1.05014e+07	687278	530928	611598	972010	3.36625e+06	1.19387e+07	1.56533e+06	1.04827e+06	4.83441e+06	1.97676e+07
HE_342_1_1	77166.1	59334.1	15261.6	40201	57994.4	68048.7	76622.3	56928.9	54828.5	77281.3	46583.9	76110.2	146491	103913	94242.3	115386	237511	1.58693e+07	847098	252498	190389	390273	6.58743e+06	2.49472e+07	576872	258874	216500	340058	224834	232699	335595	270281	303412	461355	438879	487276	625331	4.95921e+06	1.14983e+07	752215	538164	605377	924214	2.57133e+06	1.03766e+07	1.67047e+06	1.13815e+06	5.8778e+06	2.18559e+07
HA_362_1_1	21663	13874.8	34116.6	19930.9	18581.8	25845.5	29016	10382.6	33842.2	27881.8	43872.8	35381.6	70780.9	54800.3	52921.5	61380.1	148466	1.2206e+07	632616	173666	153228	264558	5.21011e+06	1.90677e+07	451218	228232	176319	291610	203166	200178	338120	226571	276757	434464	367908	439765	540394	3.917e+06	8.91809e+06	656275	548457	554530	880614	2.95894e+06	9.8257e+06	1.41888e+06	1.12702e+06	5.75473e+06	2.25566e+07
HB_362_1_1	27927.9	28578.8	34443.7	24227.9	27530.2	38453.5	23143.8	32914.7	23019.1	59313.5	23725.7	46713.3	92409.6	73561.5	54311.1	74369.6	179418	1.26076e+07	708439	170175	165677	313130	5.42799e+06	1.96239e+07	519875	258291	227667	338261	243719	224595	398938	331634	356270	517961	464276	511769	684666	4.18477e+06	9.19943e+06	785405	633271	646518	1.01268e+06	2.93017e+06	1.12832e+07	1.80097e+06	1.195e+06	4.99268e+06	2.12175e+07
HC_362_1_1	40066.3	48612.9	41424.7	54194.4	33736.7	53070.7	63388	65413.4	55739.6	63660.8	74233.2	65214.3	110270	80300.4	70544.2	110341	185272	1.20886e+07	664234	199017	194638	346567	5.20955e+06	1.89169e+07	468836	231123	249325	324253	263965	263976	407494	274976	298791	471957	436966	525895	654880	3.96092e+06	8.89749e+06	725053	612115	619121	1.01666e+06	2.99919e+06	1.08733e+07	1.61445e+06	1.14524e+06	5.4506e+06	2.1474e+07
HD_362_1_1	33245.5	34578.3	17161.8	20705.1	38221.3	20467.9	23441.5	53941.7	79999.1	54778.6	81171.8	50333	108322	82972.1	63720.2	93980.9	206336	1.21463e+07	594554	166453	179126	323968	5.49951e+06	1.86256e+07	482744	236426	219601	313183	260368	261241	411422	297699	311208	478198	449926	531563	653091	4.06612e+06	8.77707e+06	722945	619386	636175	1.00435e+06	3.17005e+06	1.10472e+07	1.62186e+06	1.15815e+06	5.20972e+06	2.11463e+07
HE_362_1_1	2688.07	1324.93	21684	13072.6	-5005.9	36594.9	12315	28885.6	24584.5	33956.5	4350.34	-22979	55038.2	58291.8	46322.5	47012.4	149415	1.29085e+07	748158	178002	143812	292742	5.39393e+06	2.0416e+07	536402	213048	212999	307122	204936	224302	346925	286134	283822	454533	443660	488551	653232	4.1432e+06	9.52343e+06	752454	572491	616337	992586	2.82794e+06	1.27177e+07	1.87199e+06	1.06285e+06	4.71303e+06	2.06272e+07
HA_363_1_1	-3828.09	-18045.1	37282	20883.4	38753.1	12029.1	11841.3	24518	24271.3	19587.8	34167.5	39832	87165.8	64996.9	18346.7	75830.2	161802	1.31602e+07	694696	209010	172600	301805	5.62374e+06	2.04833e+07	512217	242271	237858	334404	256620	225850	505409	279357	300995	481037	437804	503212	661974	4.26824e+06	9.60817e+06	765137	598646	628531	1.05559e+06	3.10015e+06	1.20672e+07	1.8256e+06	1.11694e+06	4.87983e+06	2.12445e+07
HB_363_1_1	11901	-11026.4	5038.7	19850.1	5767.84	-24685.8	-1106.39	-6457.54	24423.8	-25225.2	-22861.6	-2300.86	60485.4	-1249.44	29063.3	54927.3	109770	1.19237e+07	574892	149267	97183.9	237067	5.19718e+06	1.85337e+07	427542	227087	188076	281963	189664	199158	361083	250053	269056	434683	408958	464985	572824	3.9061e+06	8.74841e+06	679489	556343	547774	902174	3.01988e+06	9.89319e+06	1.43583e+06	1.18488e+06	5.78475e+06	2.24586e+07
HC_363_1_1	46124.7	56381.7	46234.5	33000.3	33733	57135	57669.2	53459.4	54663.7	61362.2	35993.5	57364.8	113124	90300.4	79322.6	97315.9	177275	1.19434e+07	685640	202623	182906	323536	5.1035e+06	1.87578e+07	473916	241632	213130	316985	234793	245599	466540	323435	338470	491768	452872	533081	643591	3.90615e+06	8.8537e+06	747532	621248	668143	1.02052e+06	3.13399e+06	1.11495e+07	1.60732e+06	1.10925e+06	5.15007e+06	2.14005e+07
HD_363_1_1	9844.66	1320.98	7556.76	15807.3	11600	34712.9	41152.9	20282.4	23751	36264.5	18070.8	29377.7	71007.7	44775.8	38851.9	70482.7	161907	1.36891e+07	724192	174217	147064	298858	5.5063e+06	2.17459e+07	513252	229297	210211	319067	191235	184269	391561	255473	226670	412952	379646	457266	539894	4.24598e+06	1.0044e+07	702527	540955	544824	919553	2.84565e+06	1.12849e+07	1.60194e+06	1.0745e+06	5.31499e+06	2.18706e+07
HE_363_1_1	16888.1	9949.96	21126.7	1932.66	4712.95	42057.2	20645.9	25860.9	24848.9	23124.1	41766.3	27822.3	61879.9	56530	30965.6	69634.5	155088	1.33178e+07	580232	172440	114135	268657	6.24492e+06	2.01601e+07	462010	245513	192423	309534	182792	202440	421148	231309	279293	431670	394629	428890	546927	4.35118e+06	9.47276e+06	643920	502183	528807	926260	3.32555e+06	1.04699e+07	1.40146e+06	1.00115e+06	5.3377e+06	2.10726e+07
HA_364_1_1	62647.4	40764.5	50215.8	49372.9	55949.7	37458.3	64167.2	50752.3	41031.2	82231.8	53082.4	53741.9	98595.5	112895	97490.2	89686.9	199233	1.26498e+07	769578	243060	193262	396957	5.041e+06	2.00168e+07	624968	308427	269420	373733	292926	295780	512804	390199	392127	582844	542649	625609	809422	4.11236e+06	9.4172e+06	932965	742969	778624	1.1266e+06	2.61947e+06	9.856e+06	2.03193e+06	1.38679e+06	5.73223e+06	2.21462e+07
HB_364_1_1	38622.9	43299	33378.6	17955.5	11215.4	34824.9	39265.8	35138.2	35534.3	41543.4	28259.3	44161	111061	83355.3	58333.7	63565.7	167013	1.35471e+07	849041	187180	149215	330298	5.01695e+06	2.20431e+07	550505	229159	219273	311772	231914	194854	347184	249483	264800	394939	381055	425196	553487	4.08943e+06	1.00924e+07	714898	553095	537666	890211	2.32426e+06	1.14641e+07	1.85153e+06	1.1057e+06	5.39407e+06	2.25438e+07
HC_364_1_1	36881.4	47265.2	48774.6	49817.5	45051.1	37692.8	48237	41697.2	69774	61377.4	55099.8	53860.1	109040	90577.8	55356.2	95218.9	205369	1.31357e+07	770560	199372	187758	311790	4.86523e+06	2.13383e+07	509348	228454	215316	327032	233420	234159	368883	284354	289120	434694	407443	472636	610858	3.99422e+06	9.75588e+06	712493	586486	581646	932919	2.33751e+06	1.21558e+07	1.79747e+06	1.1196e+06	5.32463e+06	2.29741e+07
HD_364_1_1	55916	60849.8	62654.4	60646.7	29629.7	59305.6	78527.6	61620.1	95191.2	83524.4	65682.9	75403.5	104181	99371.2	96841.1	133012	205005	1.14362e+07	612250	206558	175409	323034	5.39214e+06	1.73631e+07	454590	248283	237314	353586	242397	263242	427734	310319	324401	459608	456713	521365	628171	3.87379e+06	8.28227e+06	729251	598767	638139	1.00615e+06	3.30813e+06	9.83131e+06	1.5342e+06	1.19991e+06	5.36989e+06	2.09291e+07
HE_364_1_1	72953.1	53243.1	56543.4	94433.2	64646.3	63760.9	79140.5	66120.2	87468.8	103374	84606.4	81023.9	146317	138026	125046	121948	240560	1.21706e+07	682034	231649	194681	380958	4.96311e+06	1.92646e+07	497951	251810	256179	340622	263360	271206	445147	320523	371643	522384	486056	544710	697846	3.93691e+06	8.98691e+06	800337	631829	685381	1.03376e+06	2.72368e+06	1.14604e+07	1.8285e+06	1.22164e+06	5.41708e+06	2.20759e+07
HA_365_1_1	-8717.4	19792.7	26343.2	23400.3	10559.4	18443.4	-1530.24	6275.84	21345.5	49782	8955.78	36404	70883.4	46726.1	14195.1	33209.7	131498	1.18399e+07	624026	154424	133516	271535	5.04218e+06	1.85805e+07	461588	194181	185290	259983	176685	195058	372317	242065	280150	406367	374662	453130	610836	3.84276e+06	8.69042e+06	711977	560558	581975	931561	2.82678e+06	1.02945e+07	1.69969e+06	1.12388e+06	5.42333e+06	2.13943e+07
HB_365_1_1	45281.5	50253.8	55738.4	50717.1	63315.2	21854.3	54666.1	40728.7	49556.8	60371.2	78824.9	52712.2	95923.1	94086.7	85283.8	110385	188422	1.15528e+07	641459	184521	180918	292714	4.84101e+06	1.82272e+07	466443	225268	218133	323873	245040	253961	405310	298191	305551	460789	448145	495142	608253	3.72119e+06	8.52101e+06	663038	585938	589610	920712	2.81159e+06	1.01213e+07	1.49695e+06	1.30917e+06	6.10505e+06	2.32344e+07
HC_365_1_1	18468.8	33553.4	63863.5	60094.4	14147.8	49637.7	46142.7	32695.3	35762.5	54808	74090.2	890.086	98603.2	80414.8	102209	98862.1	181989	1.21025e+07	612178	199969	187220	293608	5.40872e+06	1.87323e+07	494476	250067	223043	332572	243631	249003	404258	326134	329358	488241	447680	530980	667280	4.05124e+06	8.86348e+06	770116	614311	642573	1.00608e+06	2.97389e+06	1.17909e+07	1.69981e+06	1.18259e+06	5.22982e+06	2.13749e+07
HD_365_1_1	46019.9	62647.7	58039.2	67528.7	76585.9	58943.6	63224.5	41612.7	60714	71032.9	73713.5	74715.7	89889.3	108647	80091.6	111516	184900	1.23705e+07	839445	198173	187147	327988	4.2175e+06	2.0732e+07	528358	261275	234279	330999	254662	255492	409362	300404	338856	501323	467002	516103	657657	3.76433e+06	9.46613e+06	771085	654353	646260	946470	2.07345e+06	1.15208e+07	1.96369e+06	1.22354e+06	6.0481e+06	2.40173e+07
HE_365_1_1	-25054.1	12391.5	8792.43	8848.71	-7609.07	33412.3	5719.76	16430.5	-12996.1	-4378.39	8978.94	14086.7	54526.4	41971.3	19880.5	46361.9	103273	1.31871e+07	683927	137345	126038	262018	5.64538e+06	2.08278e+07	459669	206946	179683	333236	230017	201008	407589	261149	273642	461337	417333	463104	580356	4.1895e+06	9.73081e+06	683336	530213	527507	873215	2.66883e+06	1.14855e+07	1.4741e+06	1.0205e+06	5.27483e+06	2.12282e+07
HA_366_1_1	19094.2	14428.6	5272.19	17597.5	-5066.68	21843.2	9927.37	18197	22597.9	10585.7	39156.7	8609.31	53967.2	48032.1	27328.5	55312.1	169680	1.40957e+07	745213	187096	150472	323038	5.98749e+06	2.21362e+07	551003	237291	189989	326920	229210	249147	398349	271968	289683	472169	424188	507605	626447	4.51838e+06	1.02807e+07	765678	579012	583366	981363	2.86668e+06	1.10149e+07	1.71269e+06	1.13538e+06	5.1232e+06	2.15898e+07
HB_366_1_1	34995.7	59679.7	65493.6	57212.3	55737.7	49876.6	53849.9	31855.7	63290.4	59822.6	55677.6	68861.6	120716	116849	80334.8	104416	222498	1.39706e+07	761118	229465	191482	383327	5.99615e+06	2.16484e+07	579927	232810	224655	324893	225909	226123	422908	245130	298399	447432	428574	512786	657498	4.52124e+06	1.00564e+07	733833	559922	638671	1.01028e+06	3.13221e+06	9.75144e+06	1.60945e+06	1.29248e+06	5.80113e+06	2.22427e+07
HC_366_1_1	38933.5	66063.2	87601.4	80065.7	61876.2	66925.4	59176.8	68891.5	57601.8	69077.1	69571.6	100430	145279	130805	99493.5	122417	271856	1.53305e+07	798923	236689	212321	407232	6.98616e+06	2.35188e+07	571761	281182	259795	384639	269683	269726	429732	336719	322481	548254	455161	559366	728782	5.04373e+06	1.10136e+07	833354	653141	695880	1.11438e+06	3.28604e+06	1.16717e+07	1.7867e+06	1.27486e+06	5.10594e+06	2.04413e+07
HD_366_1_1	30404.1	-14964.2	-21226.8	17230.4	11102	16253.5	12988.2	-10753.1	31169.4	46613.4	20433.2	47321.9	71232.3	78459.1	46205.7	90877.3	145143	1.38535e+07	784876	186175	140575	320040	5.90031e+06	2.17282e+07	574731	246878	197062	306914	225279	216427	395982	283694	307171	472158	440697	484126	652465	4.48877e+06	1.01025e+07	793520	617927	660053	1.02922e+06	2.88601e+06	1.18217e+07	1.92634e+06	1.23862e+06	4.96833e+06	2.14662e+07
HE_366_1_1	76876	51649.9	46047.7	57758	43139.7	63657.2	71348.4	63353.5	71046.9	85568.2	48648.5	48866.4	113226	111803	88135.1	132995	247169	1.4301e+07	679755	242521	204052	377374	7.43267e+06	2.08663e+07	516511	242339	205503	351212	239451	245766	428110	297492	327628	510359	445168	539284	692860	4.9126e+06	1.00431e+07	780225	631496	665069	1.12404e+06	4.02262e+06	1.10276e+07	1.6195e+06	1.21991e+06	4.60799e+06	1.93464e+07
HA_367_1_1	14816.4	38970	28205.4	2819.82	37958.1	31961.8	72134.8	53564.7	30215.6	42184	24798.9	32612.7	108316	65394.5	60175	73177.5	197863	1.36502e+07	695121	216665	143677	344706	6.45966e+06	2.06172e+07	550778	229693	215688	323094	248893	247036	452878	303630	312494	504773	450331	513955	662067	4.55189e+06	9.79782e+06	771973	582654	649011	989442	3.40882e+06	9.51135e+06	1.5405e+06	1.21878e+06	5.56171e+06	2.11362e+07
HB_367_1_1	51106.8	68389.8	40390.9	36879.4	45411.8	50213.3	63136.1	61025.4	71947.8	57088.1	83986.7	66857.5	103586	132702	85069.6	120819	226451	1.43034e+07	822643	248970	202833	385173	6.20717e+06	2.23696e+07	558783	293557	234120	375255	278754	268676	536963	325083	368081	508176	514039	577329	743576	4.64412e+06	1.04893e+07	832640	661352	691770	1.06642e+06	2.82075e+06	1.07163e+07	1.78073e+06	1.28846e+06	5.75822e+06	2.19041e+07
HC_367_1_1	-12127	238.196	18465	4575.67	33707.2	24780.4	12399.5	16127.8	7929.58	17248.3	35511	29118.6	82411.3	36599.5	35253	71774.4	163978	1.38304e+07	722211	184720	153527	337332	6.4243e+06	2.10007e+07	566532	240248	190117	315389	222916	245954	458856	277388	287369	468308	448936	507185	662566	4.59517e+06	9.90092e+06	752420	582681	628592	1.08308e+06	3.53895e+06	1.0665e+07	1.70058e+06	1.24213e+06	4.84496e+06	2.025e+07
HD_367_1_1	21936.3	45781.6	10325.6	33677.7	23235.4	20249.6	52352	49655.7	31589.6	45714.7	46116.3	45841.1	79744	69733	35350.8	74788.4	140766	1.3451e+07	720102	192132	151873	303327	5.50552e+06	2.13225e+07	508267	241465	189914	303206	229865	205954	397103	246337	260757	410209	382435	424150	584233	4.26778e+06	9.85153e+06	660146	514470	553079	888851	2.42752e+06	1.09943e+07	1.63276e+06	1.11099e+06	5.3247e+06	2.18752e+07
HE_367_1_1	85577.6	82034.3	67741.9	88007.5	69451.9	64196.6	80866.6	89463.2	107411	99988.1	93097.5	96759.3	159367	124166	112740	135148	243407	1.39919e+07	780350	237013	227058	402681	5.80075e+06	2.20923e+07	546532	259437	234879	333993	280525	250499	479792	326599	324117	496579	463084	538464	689309	4.47507e+06	1.02202e+07	761274	616114	629685	1.01294e+06	2.71262e+06	1.0858e+07	1.71965e+06	1.28623e+06	5.55837e+06	2.19401e+07
HA_368_1_1	-8233.73	16038.7	20266.8	11311.2	-884.309	7750.48	9627.03	-3267.69	13072.9	7590.81	-10617.6	-19767.4	37315.4	15367.1	3940.92	60327.3	126603	1.37981e+07	689057	173226	125579	323423	6.72519e+06	2.06377e+07	544072	230676	238803	316424	212906	212483	437348	255877	286012	439256	412747	468950	617037	4.61256e+06	9.85462e+06	722208	564408	566680	967865	3.50139e+06	9.02749e+06	1.42085e+06	1.12339e+06	5.21023e+06	2.0634e+07
HB_368_1_1	35136.5	49012.7	60929.3	61193.7	58229.7	83346.5	69624.7	77374.1	77582.7	78237.4	48643.3	79366.7	122512	120963	90510.4	142286	248857	1.51586e+07	833536	253415	232104	416103	6.77682e+06	2.33256e+07	651051	305526	269143	394393	293215	311903	511162	393211	380122	577461	544648	623275	815588	4.99971e+06	1.10024e+07	939125	754000	779349	1.16251e+06	2.89527e+06	1.16868e+07	2.11065e+06	1.27221e+06	4.96144e+06	2.05788e+07
HC_368_1_1	32361.3	42711.3	42310.1	33091.3	33157.8	62328.2	47351	63616.8	81174.3	63966.9	32518.9	43667.2	128174	75371.1	79924	140025	261989	1.46834e+07	704539	219567	194733	391930	7.56739e+06	2.14424e+07	559614	266792	228574	321730	277078	288271	455186	316412	348563	516231	489045	556303	729579	5.05415e+06	1.0312e+07	812436	686705	715876	1.1048e+06	3.67528e+06	9.2186e+06	1.57512e+06	1.19897e+06	5.2872e+06	1.98091e+07
HD_368_1_1	89216.1	100424	116873	77841.3	105154	123830	126169	128198	114853	108336	134542	132995	176238	160788	180530	201909	330842	1.49295e+07	744740	276274	248213	465708	7.79346e+06	2.15851e+07	608824	300260	308143	390717	298040	301860	520827	382827	384571	557115	518956	629935	792667	5.20397e+06	1.04043e+07	875711	705012	771147	1.17204e+06	3.83208e+06	7.95821e+06	1.60925e+06	1.41778e+06	5.9271e+06	2.05692e+07
HE_368_1_1	18292.1	-11667	13363.7	12528.9	11755.4	41747.4	26019.5	8311.39	10.823	40178.9	-6227.93	-14808.8	75788.1	49205.5	33194.7	44963.3	165922	1.49636e+07	771555	198827	143806	327479	6.53015e+06	2.31286e+07	636404	258787	240273	328163	232426	219763	449959	303083	284856	473765	455357	491103	717358	4.83346e+06	1.08131e+07	851153	641514	643414	1.05311e+06	2.75132e+06	1.2127e+07	2.05648e+06	1.18076e+06	4.57899e+06	2.00748e+07
HA_369_1_1	51777.8	51597.2	70542.9	48178.8	43902.8	58886.4	39053.3	71961.5	58750.8	69577.6	77245.6	74856.4	89916.7	82990.7	106509	128136	231859	1.32701e+07	678833	250092	207907	386533	6.2861e+06	2.0035e+07	543560	250622	241701	352176	265573	239619	469779	325161	355987	543933	479323	568685	761068	4.46237e+06	9.56599e+06	814129	677441	718990	1.12551e+06	3.61545e+06	1.09744e+07	1.66501e+06	1.21413e+06	4.87211e+06	2.02145e+07
HB_369_1_1	48757.2	64525.1	36939.6	47802	64281	63552.9	60179.6	49657.5	76907.9	66047.9	60905.9	75770.5	136707	126350	109285	121008	225826	1.45062e+07	809598	252993	219728	377742	5.77519e+06	2.32058e+07	555592	280822	242163	362920	274868	267183	419388	337865	338136	502254	473529	533217	690904	4.59542e+06	1.07001e+07	807637	632073	660261	992256	2.42945e+06	1.26652e+07	1.9342e+06	1.24853e+06	5.08577e+06	2.16107e+07
HC_369_1_1	61296.8	72666.5	71075	37814.4	61581.6	72347.2	80918	51445.1	68121.3	92828.9	89726.7	104328	120921	121999	111284	152221	262280	1.54279e+07	809010	237908	243034	398124	7.19937e+06	2.36561e+07	530356	252379	250990	356753	249891	253374	392920	305034	341403	497874	477239	507762	665924	5.02969e+06	1.11482e+07	757793	597191	610677	988585	3.02453e+06	1.21745e+07	1.60494e+06	1.11935e+06	4.86778e+06	2.07344e+07
HD_369_1_1	6843.98	10702.4	-1583.43	15827.4	3849.57	29727.4	38459.5	22359.5	27050.7	29061.1	27793.8	-386.056	79451.4	86378	48560.7	65368.2	180196	14861557	913451	182144	172362	348215	5.53028e+06	2.43658e+07	629461	264017	267990	353525	281828	253332	427701	349463	343664	540406	517825	517789	761009	4.59022e+06	1.11677e+07	855266	682627	651111	971448	2.23513e+06	1.13665e+07	1.9058e+06	1.22498e+06	5.72792e+06	2.3291e+07
HE_369_1_1	45447.1	36111.6	31425.5	29229.1	43679.3	22920.7	31638	40969.4	26913.9	47698.1	49685.2	30467.4	95288	92007.2	81146.4	102003	222010	1.58867e+07	715154	198454	169551	318292	7.78974e+06	2.39175e+07	561234	225430	259061	374043	254152	265335	443163	318230	315447	502253	493165	524378	688032	5.32149e+06	1.13593e+07	814257	612116	643015	1.02737e+06	3.11841e+06	1.29277e+07	1.79867e+06	1.13886e+06	4.50448e+06	1.83513e+07
H1_358_1_1	40444.3	28474.1	60616.5	60868.7	39872.2	62864.2	54280.1	57567.7	75926.2	62967.2	59712.3	60300.7	101829	93430.1	98454.5	133717	229037	1.18188e+07	490708	180318	186115	363152	7.17835e+06	1.60588e+07	453490	259360	227098	329375	252851	247415	513636	323253	357051	506956	486962	606456	692121	4.48948e+06	8.06553e+06	773758	647526	712955	1.22375e+06	5.71658e+06	6.96077e+06	1.38506e+06	1.27082e+06	5.03137e+06	1.8618e+07
H2_358_1_1	83382.5	84442.8	96847.4	98237.2	98428.1	101930	90490.5	121961	109004	114727	105633	128713	191603	163378	168598	211660	327234	1.36906e+07	687600	273530	272280	467533	7.55033e+06	1.95451e+07	535398	321778	300297	420958	333005	339521	563034	426209	443276	645879	583694	662899	834852	4.99852e+06	9.62529e+06	889815	793399	831391	1.22013e+06	4.19525e+06	1.05483e+07	1.77569e+06	1.27918e+06	4.69052e+06	1.90067e+07
H3_358_1_1	86253.7	65402.8	67813.5	78145.1	104780	91960.9	93299.2	85526.4	101307	120204	126655	101498	170100	140284	148552	178693	294008	1.28774e+07	586882	253343	257005	416872	7.06128e+06	1.83265e+07	480287	268900	271941	361717	288477	287282	493142	374035	364722	541671	525344	588897	722286	4.62796e+06	8.98245e+06	789913	697876	723541	1.12091e+06	4.14103e+06	8.75572e+06	1.49684e+06	1.28654e+06	5.11881e+06	1.96812e+07
H4_358_1_1	58623	63990.1	58316	56972.8	53592.7	36525.9	75414.7	42859.8	57855.1	92030.6	80621	88360.5	106159	94051.4	86658.8	134227	254354	1.26149e+07	600853	203504	203375	384833	6.58244e+06	1.82925e+07	519606	270399	250676	349434	251638	301309	513968	349668	357814	519015	493297	581805	729885	4.46024e+06	8.89626e+06	797767	685166	717515	1.14333e+06	4.30535e+06	8.20384e+06	1.48317e+06	1.37451e+06	5.37754e+06	2.08374e+07
H5_358_1_1	86682.7	78931	82581.4	100385	70849.4	68312	85963.7	107818	88157.1	104437	105767	99552.2	196050	142928	138020	144534	276556	1.40487e+07	602846	232970	219352	387312	8.46162e+06	1.92995e+07	460233	238151	240737	328482	274388	274320	475485	310698	336421	497168	464478	528552	685097	5.07657e+06	9.58694e+06	717263	630280	666772	1.12514e+06	4.7091e+06	8.71779e+06	1.42497e+06	1.13835e+06	4.59607e+06	1.74905e+07
HA_359_1_1	-5009.6	43625.6	35186.7	55872.8	26859.5	31171.1	67588.2	34706.5	32327.1	68805.5	48193.6	63735.8	102217	79021	72939.4	69976.4	215847	1.47974e+07	642978	206851	168517	304276	6.96135e+06	2.24816e+07	493448	201158	206938	319438	205728	221319	442297	254485	273017	405663	366509	441969	541410	4.79017e+06	1.05334e+07	670146	513911	546265	930106	3.29867e+06	1.1618e+07	1.43768e+06	991825	4.67599e+06	1.98024e+07
HB_359_1_1	24490.5	47931.9	49332.2	56199.7	30810.1	29956.6	63282.3	67370.2	62277.4	69999.8	58104.7	83580.2	97616.1	102566	109433	124868	230179	1.38264e+07	640624	194145	194520	339485	6.82062e+06	2.0704e+07	489148	238313	232760	345418	250554	278845	464322	319367	335823	515713	481720	547990	683313	4.69475e+06	9.9023e+06	757177	609090	683660	1.05908e+06	3.07643e+06	1.25488e+07	1.70594e+06	1.13051e+06	4.61517e+06	1.94299e+07
HC_359_1_1	30477.3	37940.8	67683.6	37417.4	19816.9	29368	46572.5	39201	52516.6	65905.8	67632.4	55314.8	121389	69843.2	57109.9	86513.9	212319	1.44742e+07	732729	235307	184828	343485	6.53925e+06	2.22391e+07	531406	252631	223356	344498	251141	224627	409667	252874	269741	443746	406352	461903	638792	4.70901e+06	1.04035e+07	716672	626488	604853	991711	3.25759e+06	1.09601e+07	1.56765e+06	1.14625e+06	5.18903e+06	2.09041e+07
HD_359_1_1	66214.9	73905.6	68411.1	51838	51999.6	37884.8	91332.1	79163.4	71252.8	98913.5	102410	69791	155544	110504	100751	137004	240788	1.40689e+07	618592	235206	208476	386453	6.93738e+06	2.10167e+07	481603	259600	252205	371363	273048	290032	522654	360850	368614	540648	476147	546800	715780	4.79695e+06	1.00134e+07	786529	650857	685376	1.04912e+06	3.19638e+06	1.25897e+07	1.66776e+06	1.13235e+06	4.62139e+06	2.00055e+07
HE_359_1_1	41235.2	39072.5	6789.17	22597.7	34566	25445.9	44610.3	17436.7	35001.8	25671.5	14506.9	20135.8	85469.1	44890.6	64969.2	97891.5	161539	1.48245e+07	640272	160856	163836	277344	7.36518e+06	2.21286e+07	477741	207992	195712	314015	211935	204852	412330	244591	240444	431749	354621	396263	556263	4.9029e+06	1.04772e+07	662633	529944	541780	919819	3.00442e+06	1.2365e+07	1.4879e+06	977500	4.45462e+06	1.97072e+07
HA_360_1_1	2377.99	17704	-6322.07	27949.2	16994	40830.3	39349.1	54599	27889.3	46190.3	9374.85	21241.4	65389.5	36836.5	40268.1	98642.2	186095	1.38801e+07	668180	205928	173056	327532	6.73733e+06	2.07377e+07	536054	243384	175408	318207	234421	200228	361718	243180	257844	460580	426756	475185	669216	4.63794e+06	9.85382e+06	743604	560042	616272	1.02586e+06	3.30187e+06	1.09786e+07	1.69159e+06	1.13072e+06	4.34839e+06	1.82553e+07
HB_360_1_1	50831.3	74494.1	52782.2	69837.7	82374.5	71664.5	95023.8	73536	79958.2	93139.7	79341	80858.5	118919	127257	100852	124535	229595	1.33343e+07	656031	227346	220331	385920	6.63773e+06	1.96797e+07	514551	267902	216605	360208	263456	234951	395360	316526	332635	502471	451726	560170	698198	4.57555e+06	9.44416e+06	746382	627068	704976	1.15947e+06	3.96199e+06	1.03467e+07	1.61593e+06	1.24328e+06	4.78625e+06	1.89996e+07
HC_360_1_1	76022.2	67695.9	72428.7	84658.6	104375	112454	99798.7	113735	104392	109838	108956	121082	180088	131695	148119	191996	297430	1.40109e+07	689384	250805	249392	462577	7.53213e+06	2.01948e+07	512940	275094	232750	375375	287771	275624	413071	321096	344391	546199	453339	552330	711630	4.91816e+06	9.78176e+06	755888	617101	716600	1.13564e+06	3.98738e+06	1.06504e+07	1.56008e+06	1.17123e+06	4.46324e+06	1.83536e+07
HD_360_1_1	-1186.45	22230.6	13616.9	32263.3	5108.17	25455.1	-21880.6	35547.9	19915.2	24039.4	29543.8	13201.3	69643.2	30223.5	31600.7	54496.8	145920	1.37154e+07	699145	168730	149167	292665	6.33224e+06	2.09851e+07	523153	210683	198138	277632	227419	216169	331337	227285	235676	389411	345141	443213	587101	4.4286e+06	9.8802e+06	690440	536153	560420	982143	3.26475e+06	1.16718e+07	1.59466e+06	1.06061e+06	4.54688e+06	1.94e+07
HE_360_1_1	44393.9	72944.2	70190.1	40823.1	38642.1	63120.2	67280.5	71115.8	71372.7	75268.9	40045.6	91795.1	139443	86287.7	96770.6	133673	213019	1.35681e+07	648590	217702	180910	363125	6.98679e+06	1.9864e+07	469802	274671	221913	343712	258139	262137	373576	300702	343214	534294	475014	553800	707552	4.68474e+06	9.60289e+06	776449	660063	689721	1.12084e+06	3.6879e+06	1.21456e+07	1.66518e+06	1.17436e+06	4.51044e+06	1.83772e+07
HA_361_1_1	58366.3	11945.6	33190.6	34723.6	44414.7	29758.8	24634	41091.4	39382.3	25804.3	48983.1	43145.1	121263	60698.1	68007.3	103997	182500	1.34738e+07	580277	201387	174615	340447	7.75495e+06	1.89305e+07	464818	216016	201254	299588	247633	255505	375361	289730	317920	471981	425716	498292	665351	4.80448e+06	9.30914e+06	677929	553863	637815	1.11206e+06	5.5266e+06	8.35982e+06	1.29188e+06	1.12073e+06	4.87314e+06	1.82266e+07
HB_361_1_1	108183	66768	80767.6	92606.5	67183.4	75440.9	111401	87700.5	78770.5	84500	123710	124490	156490	123755	157357	157108	271889	1.42127e+07	635528	268930	243032	438976	8.0576e+06	2.00755e+07	464409	270242	265097	394049	307953	326907	477816	359150	420639	563773	541387	637525	769426	5.15241e+06	9.87439e+06	806967	667689	749750	1.15007e+06	4.28473e+06	1.03157e+07	1.55446e+06	1.24955e+06	5.04488e+06	1.87613e+07
HC_361_1_1	102101	94185.5	82257.7	98289.7	55584.5	83655.8	105385	85048.8	124239	139565	107500	118883	166415	132841	137448	190191	323988	1.20345e+07	555847	258723	251735	403149	6.75208e+06	1.70536e+07	455780	258721	290225	372295	296509	327576	457114	365077	398048	567065	519871	605079	727081	4.43732e+06	8.38961e+06	780578	673841	753726	1.20612e+06	5.17944e+06	9.51194e+06	1.47896e+06	1.25882e+06	5.10172e+06	1.9355e+07
HD_361_1_1	14695.3	13005.1	-682.586	11383.3	22317.9	34048.5	55048.5	35490	30780.7	38483.9	60901	33305.7	107365	52034.7	38646.2	84975	176671	1.29495e+07	566586	154863	143388	311433	7.49121e+06	1.8304e+07	456193	220343	209935	327234	246499	274244	392584	283320	312764	506313	432976	545573	676221	4.7072e+06	9.02887e+06	730690	606976	648750	1.09293e+06	5.44013e+06	8.69076e+06	1.35001e+06	1.17318e+06	5.12163e+06	1.86504e+07
HE_361_1_1	23300.6	46948.4	34618.5	63938.6	55373.4	42903.1	60389.6	25080.1	37890.8	77076.7	62505.2	33871.3	101551	89381.3	93543.1	108713	188250	1.38333e+07	730943	217705	201898	351245	5.96839e+06	2.15187e+07	517997	273267	223159	328932	220352	246125	380162	307534	340949	500428	457230	537740	693061	4.56275e+06	1.00018e+07	793925	597850	655823	992694	3.10582e+06	1.16252e+07	1.6813e+06	1.20913e+06	5.43079e+06	2.16627e+07
[truncated: 137 more columns]

## Sheet: green data
nr	rep	Municipality	Farm	Fermentation time	SolarDry	Variety	sample	weight
334	HA	1	2	24	2	4	16	0.198
334	HB	1	2	24	2	4	16	0.2043
334	HC	1	2	24	2	4	16	0.2004
334	HD	1	2	24	2	4	16	0.2012
334	HE	1	2	24	2	4	16	0.1978
335	HA	1	2	24	1	4	15	0.194
335	HB	1	2	24	1	4	15	0.204
335	HC	1	2	24	1	4	15	0.196
335	HD	1	2	24	1	4	15	0.209
335	HE	1	2	24	1	4	15	0.204
336	HA	1	2	12	2	4	14	0.206
336	HB	1	2	12	2	4	14	0.199
336	HC	1	2	12	2	4	14	0.202
336	HD	1	2	12	2	4	14	0.191
336	HE	1	2	12	2	4	14	0.203
337	HA	1	2	12	1	4	13	0.2
337	HB	1	2	12	1	4	13	0.2
337	HC	1	2	12	1	4	13	0.194
337	HD	1	2	12	1	4	13	0.19
337	HE	1	2	12	1	4	13	0.206
338	HA	1	2	24	2	5	20	0.2
338	HB	1	2	24	2	5	20	0.1976
338	HC	1	2	24	2	5	20	0.2039
338	HD	1	2	24	2	5	20	0.2004
338	HE	1	2	24	2	5	20	0.1983
339	HA	1	2	24	1	5	19	0.199
339	HB	1	2	24	1	5	19	0.2067
339	HC	1	2	24	1	5	19	0.209
339	HD	1	2	24	1	5	19	0.198
339	HE	1	2	24	1	5	19	0.203
340	HA	1	2	12	2	5	18	0.2
340	HB	1	2	12	2	5	18	0.204
340	HC	1	2	12	2	5	18	0.206
340	HD	1	2	12	2	5	18	0.205
340	HE	1	2	12	2	5	18	0.202
341	HA	1	2	12	1	5	17	0.2015
341	HB	1	2	12	1	5	17	0.1989
341	HC	1	2	12	1	5	17	0.1967
341	HD	1	2	12	1	5	17	0.2075
341	HE	1	2	12	1	5	17	0.197
342	HA	1	2	24	2	3	24	0.1974
342	HB	1	2	24	2	3	24	0.2042
342	HC	1	2	24	2	3	24	0.2001
342	HD	1	2	24	2	3	24	0.1985
342	HE	1	2	24	2	3	24	0.203
343	HA	1	2	24	1	3	23	0.1995
343	HB	1	2	24	1	3	23	0.206
343	HC	1	2	24	1	3	23	0.2055
343	HD	1	2	24	1	3	23	0.2034
343	HE	1	2	24	1	3	23	0.1958
344	HA	1	2	12	2	3	22	0.205
344	HB	1	2	12	2	3	22	0.207
344	HC	1	2	12	2	3	22	0.203
344	HD	1	2	12	2	3	22	0.197
344	HE	1	2	12	2	3	22	0.195
345	HA	1	2	12	1	3	21	0.203
345	HB	1	2	12	1	3	21	0.203
345	HC	1	2	12	1	3	21	0.205
345	HD	1	2	12	1	3	21	0.198
345	HE	1	2	12	1	3	21	0.199
346	HA	1	1	12	1	1	1	0.2
346	HB	1	1	12	1	1	1	0.197
346	HC	1	1	12	1	1	1	0.209
346	HD	1	1	12	1	1	1	0.194
346	HE	1	1	12	1	1	1	0.196
347	HA	1	1	12	2	1	2	0.2036
347	HB	1	1	12	2	1	2	0.2011
347	HC	1	1	12	2	1	2	0.2032
347	HD	1	1	12	2	1	2	0.1994
347	HE	1	1	12	2	1	2	0.1984
348	HA	1	1	24	1	1	3	0.2
348	HB	1	1	24	1	1	3	0.204
348	HC	1	1	24	1	1	3	0.198
348	HD	1	1	24	1	1	3	0.206
348	HE	1	1	24	1	1	3	0.195
349	HA	1	1	24	2	1	4	0.201
349	HB	1	1	24	2	1	4	0.204
349	HC	1	1	24	2	1	4	0.198
349	HD	1	1	24	2	1	4	0.202
349	HE	1	1	24	2	1	4	0.203
350	HA	1	1	24	1	2	7	0.207
350	HB	1	1	24	1	2	7	0.2
350	HC	1	1	24	1	2	7	0.199
350	HD	1	1	24	1	2	7	0.2
350	HE	1	1	24	1	2	7	0.2
351	HA	1	1	24	2	2	8	0.208
351	HB	1	1	24	2	2	8	0.206
351	HC	1	1	24	2	2	8	0.2028
351	HD	1	1	24	2	2	8	0.2
351	HE	1	1	24	2	2	8	0.2
352	HA	1	1	12	1	2	5	0.197
352	HB	1	1	12	1	2	5	0.208
352	HC	1	1	12	1	2	5	0.201
352	HD	1	1	12	1	2	5	0.201
352	HE	1	1	12	1	2	5	0.2
353	HA	1	1	12	2	2	6	0.205
353	HB	1	1	12	2	2	6	0.202
353	HC	1	1	12	2	2	6	0.205
353	HD	1	1	12	2	2	6	0.209
353	HE	1	1	12	2	2	6	0.207
354	HA	1	1	24	1	3	11	0.206
354	HB	1	1	24	1	3	11	0.205
354	HC	1	1	24	1	3	11	0.205
354	HD	1	1	24	1	3	11	0.2
354	HE	1	1	24	1	3	11	0.208
355	HA	1	1	24	2	3	12	0.1943
355	HB	1	1	24	2	3	12	0.2053
355	HC	1	1	24	2	3	12	0.2024
355	HD	1	1	24	2	3	12	0.2016
355	HE	1	1	24	2	3	12	0.2003
356	HA	1	1	12	1	3	9	0.198
356	HB	1	1	12	1	3	9	0.198
356	HC	1	1	12	1	3	9	0.205
356	HD	1	1	12	1	3	9	0.202
356	HE	1	1	12	1	3	9	0.198
357	HA	1	1	12	2	3	10	0.1947
357	HB	1	1	12	2	3	10	0.207
357	HC	1	1	12	2	3	10	0.2077
357	HD	1	1	12	2	3	10	0.1933
357	HE	1	1	12	2	3	10	0.2004
358	HA	2	3	12	1	7	33	0.2074
358	HB	2	3	12	1	7	33	0.2088
358	HC	2	3	12	1	7	33	0.2073
358	HD	2	3	12	1	7	33	0.1998
358	HE	2	3	12	1	7	33	0.2019
359	HA	2	3	12	2	7	34	0.206
359	HB	2	3	12	2	7	34	0.204
359	HC	2	3	12	2	7	34	0.2
359	HD	2	3	12	2	7	34	0.202
359	HE	2	3	12	2	7	34	0.205
360	HA	2	3	24	1	7	35	0.206
360	HB	2	3	24	1	7	35	0.2
360	HC	2	3	24	1	7	35	0.2
360	HD	2	3	24	1	7	35	0.206
360	HE	2	3	24	1	7	35	0.2
361	HA	2	3	24	2	7	36	0.2037
361	HB	2	3	24	2	7	36	0.203
361	HC	2	3	24	2	7	36	0.1994
361	HD	2	3	24	2	7	36	0.2026
361	HE	2	3	24	2	7	36	0.2037
362	HA	2	3	12	1	1	25	0.2026
362	HB	2	3	12	1	1	25	0.2002
362	HC	2	3	12	1	1	25	0.199
362	HD	2	3	12	1	1	25	0.1971
362	HE	2	3	12	1	1	25	0.2028
363	HA	2	3	12	2	1	26	0.204
363	HB	2	3	12	2	1	26	0.194
363	HC	2	3	12	2	1	26	0.205
363	HD	2	3	12	2	1	26	0.203
363	HE	2	3	12	2	1	26	0.195
364	HA	2	3	24	1	1	27	0.205
364	HB	2	3	24	1	1	27	0.208
364	HC	2	3	24	1	1	27	0.208
364	HD	2	3	24	1	1	27	0.193
364	HE	2	3	24	1	1	27	0.199
365	HA	2	3	24	2	1	28	0.204
365	HB	2	3	24	2	1	28	0.2063
365	HC	2	3	24	2	1	28	0.2044
365	HD	2	3	24	2	1	28	0.2049
365	HE	2	3	24	2	1	28	0.2018
366	HA	2	3	12	1	6	29	0.205
366	HB	2	3	12	1	6	29	0.202
366	HC	2	3	12	1	6	29	0.205
366	HD	2	3	12	1	6	29	0.203
366	HE	2	3	12	1	6	29	0.195
367	HA	2	3	12	2	6	30	0.2005
367	HB	2	3	12	2	6	30	0.2048
367	HC	2	3	12	2	6	30	0.2028
367	HD	2	3	12	2	6	30	0.2033
367	HE	2	3	12	2	6	30	0.1986
368	HA	2	3	24	1	6	31	0.1954
368	HB	2	3	24	1	6	31	0.205
368	HC	2	3	24	1	6	31	0.2009
368	HD	2	3	24	1	6	31	0.1954
368	HE	2	3	24	1	6	31	0.1993
369	HA	2	3	24	2	6	32	0.1988
369	HB	2	3	24	2	6	32	0.1993
369	HC	2	3	24	2	6	32	0.1979
369	HD	2	3	24	2	6	32	0.2031
369	HE	2	3	24	2	6	32	0.2021

## Sheet: Metab-green
	Valine	Alanine	Quinic_acid	Acetic_acid	GABA	Malic_acid	Citric_acid	Caffeine	Theophylline	Trigonelline	5-CQA	Sucrose	Chlorogenic_acid	Fumaric_acid	Formic_acid
HA334	0.369921	1.3872	31.7207	0.739842	1.15055	20.6231	69.0828	39.7836	3.11703	46.0552	67.6002	50.4942	14.8991	0.052181	0.739842
HB334	0.358514	1.61331	31.6388	0.627399	0.948438	21.5108	63.6362	49.614	2.11259	43.8283	63.466	46.9653	13.8998	0.0246176	0.627399
HC334	0.274118	1.55334	32.3459	0.730982	1.4813	21.9295	58.7527	44.3588	3.44065	44.3158	60.9056	50.5291	13.2966	0.0352214	0.639609
HD334	0.273028	1.54716	32.8544	0.637066	1.37274	21.8423	67.1649	45.1455	2.99022	46.0508	65.833	53.6045	14.2909	0.0319077	0.728075
HE334	0.277721	1.66633	29.3459	0.833164	1.58677	22.6806	67.9491	47.0227	2.72717	46.1943	70.1844	53.3225	15.0244	0.029662	0.648016
HA335	0.471935	1.69897	31.5253	0.755097	1.4591	21.4259	63.8057	43.623	2.51821	46.816	63.6158	53.3287	13.7118	0.0992179	0.943871
HB335	0.538562	1.43616	34.3782	1.01568	1.17238	25.4022	66.1533	48.1245	2.41539	44.7904	69.7953	48.0217	14.6435	0.0410328	0.897603
HC335	0.560544	2.24217	33.8195	0.934239	0.830994	21.8612	76.7945	46.5928	3.00528	51.8503	67.0172	49.5147	14.7643	0.0487978	1.02766
HD335	0.525677	1.83987	33.8186	1.01419	1.18403	22.7793	64.8335	46.7461	3.66801	47.311	64.2111	62.8184	13.7212	0.0411342	0.963742
HE335	0.538562	1.61568	31.7751	0.718082	0.7511	21.2732	62.5629	48.7628	2.52872	47.5729	68.9881	50.9838	14.1804	0.0517772	0.897603
HA336	0.444444	1.68889	32.3555	0.533333	1.11702	24.0889	69.7777	43.5612	3.2377	46.9333	64.3929	52.5333	13.9846	0.0476855	0.622222
HB336	0.368062	1.56426	31.3773	0.59659	1.24704	23.556	61.5584	47.4705	2.93927	48.3082	71.5602	53.6451	15.0354	0.0159267	0.644109
HC336	0.362596	1.63168	31.0019	0.725192	1.77966	23.4781	68.0774	41.1394	2.94729	48.1346	63.8389	52.8483	13.6374	0.0619558	0.634543
HD336	0.383478	1.72565	31.2535	0.671087	1.48427	24.0633	65.9583	45.6615	3.1544	48.4141	74.7257	53.687	15.4863	0.0766078	0.766957
HE336	0.36081	1.62364	33.4651	0.631417	1.01355	22.4604	76.9427	43.6499	3.07982	49.2505	67.8903	50.0623	14.8687	0.0444693	0.631417
HA337	0.549333	1.83111	32.5022	0.640888	0.963182	21.3324	65.1875	40.5735	3.37761	48.7075	67.5286	53.1937	14.343	0.0490518	0.732444
HB337	0.457777	1.73955	28.9315	0.640888	0.497854	22.3395	65.8284	44.7056	3.09366	49.8062	70.6556	53.9262	14.174	0.0779872	0.915555
HC337	0.566322	1.60458	33.885	0.660709	1.14551	20.7652	74.1882	42.4664	2.70118	48.2318	69.5372	58.048	13.9796	0.0586273	0.755097
HD337	0.481871	2.02386	30.4542	0.674619	1.39711	22.3588	65.5344	47.8667	2.69825	45.2959	73.373	52.042	14.9685	0.0479773	0.770993
HE337	0.533333	2.04444	34.7555	0.444444	0.569854	22.0444	69.4221	43.9554	3.21988	45.7777	69.3953	55.8222	13.9122	0.0423477	0.71111
HA338	0.549333	1.73955	33.9671	0.823999	1.72084	23.4382	64.1804	43.4688	3.67245	48.6159	66.0722	63.9973	13.4301	0.0815171	0.915555
HB338	0.556005	1.48268	33.453	1.11201	1.64047	25.1129	61.2532	39.5656	3.79464	46.5191	65.2411	62.8285	13.7488	0.11877	0.74134
HC338	0.538826	1.88589	33.497	0.808238	1.55557	23.7083	61.3363	43.1406	3.44137	50.919	64.1999	58.0136	13.1735	0.0543244	0.718434
HD338	0.639609	1.64471	37.1887	0.913727	1.9005	25.7671	63.5954	41.3994	3.61815	51.0773	57.701	65.8797	12.6141	0.122627	0.822354
HE338	0.646382	1.56979	37.8595	0.831063	1.68063	24.6549	60.4829	44.4111	3.35803	43.2153	58.9897	61.037	12.9431	0.0902786	0.831063
HA339	0.552093	1.7483	37.2663	0.736124	1.60682	23.74	64.5029	41.9329	2.95001	51.5287	58.5032	64.5029	12.7161	0.102165	0.736124
HB339	0.531527	1.4174	37.4726	0.708702	1.5286	24.3616	67.9468	42.5239	3.33686	47.483	59.1694	60.594	12.4756	0.0519996	0.620114
HC339	0.700903	1.83987	36.7974	0.788516	1.64132	24.2688	49.4137	44.0006	3.29471	53.2686	55.6727	66.9362	12.3862	0.0596378	0.700903
HD339	0.462401	1.10976	32.0906	0.832322	1.59449	23.9524	67.973	40.123	3.18185	53.0837	62.5101	62.9791	13.342	0.0785796	0.647362
HE339	0.451012	1.17263	34.7279	0.721619	1.63734	23.9036	67.291	39.7116	4.28677	48.5289	55.6688	62.5103	12.4641	0.0874235	0.811822
HA340	0.732444	1.73955	35.432	1.09867	1.55561	21.0578	49.3484	36.8958	2.54794	52.2782	47.9922	62.6239	10.7978	0.0820017	1.09867
HB340	0.718082	1.97473	33.8396	0.897603	1.2683	23.4274	55.9206	38.4699	3.1101	49.9067	49.0442	62.3834	10.9448	0.0840607	1.07712
HC340	0.622222	1.6	33.4222	0.977777	1.14656	20.8889	47.7333	37.6104	3.12587	53.7777	52.5123	59.2888	10.7708	0.141048	1.24444
HD340	0.714579	1.96509	35.461	0.982546	1.26503	26.0821	55.6479	39.8447	2.81004	56.0051	49.9782	66.8132	11.1058	0.102583	1.07187
HE340	0.543894	1.81298	32.9962	0.90649	1.65215	24.1126	62.9104	40.0599	2.60418	54.6613	57.2362	64.6327	12.2661	0.0997168	0.90649
H1341	0.545243	1.81748	26.8078	0.726991	1.39406	21.3554	53.6156	36.3031	3.35118	41.2568	50.9323	47.6179	11.4201	0.052315	0.817865
H2341	0.460309	1.65711	31.3931	0.552371	1.42315	21.0822	53.3038	36.5259	2.69227	45.7547	46.0297	55.2371	10.7246	0.0377566	0.920618
H3341	0.65164	1.76874	31.7442	0.65164	1.44715	24.0176	64.4193	35.8559	3.88789	49.2454	47.4045	61.3473	10.99	0.040155	0.837823
H4341	0.441231	1.58843	30.8862	0.70597	1.33943	22.238	57.0953	35.1382	2.69368	47.7412	45.4455	56.5658	10.7682	0.0935312	0.794216
H5341	0.464749	1.67309	30.7664	0.557698	1.45929	20.4489	37.3658	40.9093	3.14834	46.289	50.0198	55.8628	11.6916	0.0765848	0.929497
HA342	0.371045	1.29866	32.7448	0.463807	1.58302	25.2311	60.8514	43.8991	4.40318	48.978	61.6123	53.1523	13.7753	0.0792229	0.463807
HB342	0.358689	1.07607	28.8745	0.538034	0.849996	25.4669	57.5696	40.2823	3.34524	51.4719	65.2634	52.0996	14.5754	0.0939345	0.538034
HC342	0.366039	1.18963	34.6822	0.457549	1.20493	25.1652	59.5728	40.6455	4.51848	58.9322	69.6115	59.0238	15.6123	0.0505246	0.640568
HD342	0.368989	1.38371	34.316	0.368989	1.09857	26.1982	54.1492	47.5348	3.20997	51.105	62.5612	52.0275	13.9746	0.0346771	0.553484
HE342	0.36081	1.62364	32.2925	0.541215	1.28451	22.731	60.3454	37.8221	3.10121	53.2194	66.0172	53.941	14.54	0.102233	0.451012
H1343	0.36714	1.37677	29.004	0.734279	1.10339	22.0284	51.9503	38.904	2.92369	51.4913	56.9461	53.4188	12.245	0.0463947	0.826064
H2343	0.444444	1.6	30.5777	0.977777	0.9063	25.7777	57.5999	37.2256	4.06292	61.0666	70.2425	55.2888	14.5772	0.0655687	0.888888
H3343	0.445525	1.51479	29.8502	0.623735	1.2803	22.1872	56.4926	41.3382	3.27136	47.7603	58.6523	51.5027	12.651	0.0819048	0.712841
H4343	0.450125	1.35038	30.0684	0.630175	1.09833	20.5257	53.4749	41.7275	2.84786	54.6452	58.8353	49.6038	12.5995	0.0636951	0.90025
H5343	0.467597	1.49631	29.2716	0.748155	1.20861	22.0706	50.8745	42.3739	2.67956	51.5292	57.3441	47.1338	12.2355	0.077503	0.841674
HA344	0.446612	1.25051	32.96	0.714579	1.25443	24.8316	59.3101	39.1487	4.00438	56.809	62.4412	61.2752	13.37	0.091528	0.625257
HB344	0.442297	1.41535	30.5185	0.619216	0.940376	20.9649	62.01	40.4988	2.77126	51.3949	65.7528	52.8987	13.3372	0.0515954	0.619216
HC344	0.541215	1.35304	34.0063	0.721619	1.15317	24.1742	59.5336	44.9551	3.60738	49.9721	69.7387	51.4154	14.2924	0.0575079	0.631417
HD344	0.464749	1.39425	34.5773	0.650648	1.18713	24.3528	64.7859	42.3661	4.04141	58.9301	65.5915	52.6095	13.7491	0.08276	0.743598
HE344	0.469515	1.50245	33.7112	0.563418	1.05809	23.9453	59.1589	45.7748	3.08738	53.3369	70.9007	54.182	14.6582	0.043193	0.563418
HA345	0.36081	1.53344	34.2769	0.451012	0.960754	26.3391	60.9768	44.6536	3.83618	51.5958	63.9243	60.3454	14.1337	0.0555428	0.631417
HB345	0.36081	1.35304	29.9472	0.541215	0.839701	23.7232	58.2708	41.2454	3.02371	56.0157	66.475	51.9566	14.2555	0.0712944	0.541215
HC345	0.446612	1.69713	33.3173	0.446612	1.16051	23.4025	57.4343	43.073	3.46006	52.1643	61.9362	59.2207	13.662	0.0596426	0.625257
HD345	0.369921	1.29472	30.0561	0.647362	1.20571	24.7847	59.4648	45.6374	2.9631	52.6213	63.9661	47.9973	14.327	0.069015	0.647362
HE345	0.368062	1.56426	34.5978	0.736124	1.47012	26.8685	62.9386	41.8434	3.64994	53.0009	62.8428	60.7303	14.3555	0.0798803	0.644109
HA346	0.366222	1.55644	35.7066	0.457777	1.7044	17.8533	42.3902	42.2557	2.30897	43.9466	60.3795	66.7439	12.5524	0.0585458	0.915555
HB346	0.464749	2.13784	38.6671	0.557698	1.11356	19.8912	32.9971	48.1472	2.57973	48.8915	64.1706	57.1641	13.5438	0.0550545	0.743598
HC346	0.350452	1.75226	38.1992	0.525677	1.33831	26.2839	54.4076	42.967	3.77863	52.1297	67.8933	64.5707	14.6289	0.0383161	0.700903
HD346	0.471935	1.88774	34.2625	0.566322	1.16512	22.181	39.4538	48.1501	2.35135	51.1578	68.8521	54.7445	14.1725	0.0606087	0.755097
HE346	0.373696	2.24217	38.7709	0.653968	1.19809	23.9165	59.1374	45.1632	2.74858	51.9437	64.3616	58.5768	13.869	0.0298954	0.747391
HA347	0.53962	1.52892	32.647	0.629556	1.3646	22.8439	56.0305	42.6645	2.63637	47.6664	63.9586	51.6236	13.5357	0.0776645	0.719493
HB347	0.455273	1.54793	32.5976	0.637383	1.09034	20.6694	58.7303	46.0927	2.71175	45.0721	65.2255	55.3612	14.1048	0.0462475	0.637383
HC347	0.450568	1.62205	33.6124	0.450568	0.850821	20.0052	54.699	49.0983	2.24223	46.5888	66.5299	55.2397	14.1773	0.069161	0.630795
HD347	0.550986	1.56113	33.7938	0.550986	1.01894	21.2129	58.129	46.7573	2.47272	46.0991	64.8724	50.507	14.1093	0.0574067	0.734648
HE347	0.553763	1.93817	38.5788	0.369175	1.07455	22.8889	58.7912	48.4631	2.46185	48.4542	60.8966	57.6836	13.6209	0.0769673	0.73835
HA348	0.457777	2.28889	38.4533	0.549333	0.653819	23.6213	50.7217	50.1554	2.41005	47.3342	57.3738	47.9751	12.9339	0.0711713	0.732444
HB348	0.359041	1.70544	35.2758	0.538562	1.13527	23.7865	56.7285	45.3416	2.42868	49.0091	62.7474	56.8182	13.9265	0.0353641	0.628322
HC348	0.462401	2.49697	37.2695	0.554882	0.962746	24.1373	59.0024	47.8102	2.69895	53.6386	61.5644	58.1701	14.3714	0.0658152	0.647362
HD348	0.355555	1.86666	35.9111	0.622222	1.31992	26.4	55.5555	40.4734	3.65196	49.2444	61.8511	64.8888	14.6803	0.0407045	0.622222
HE348	0.469515	1.97196	32.7722	0.563418	1.0929	23.3819	57.4687	46.8189	2.09918	48.5479	65.982	52.5857	14.2692	0.0683665	0.657321
HA349	0.5466	1.5487	33.4337	0.7288	1.46864	24.2326	59.4883	40.1378	3.39521	51.5626	60.0597	63.9522	13.7449	0.0806483	0.7288
HB349	0.538562	1.79521	37.3403	0.269281	1.0258	20.5551	46.3163	48.0575	2.41302	47.932	61.2685	51.8814	13.0539	0.0694589	0.718082
HC349	0.462401	1.94209	44.298	0.369921	0.728261	25.617	40.2289	48.7855	2.6443	47.3499	57.5028	60.7595	12.9412	0.0560042	0.739842
HD349	0.543894	1.81298	37.8913	0.362596	0.759937	21.7558	45.1432	49.7877	2.1287	47.5907	64.7466	56.565	13.7943	0.0750887	0.725192
HE349	0.631417	2.25506	35.9006	0.36081	0.949102	28.053	49.8819	52.5021	2.31748	48.0779	68.865	66.5694	14.4985	0.095115	0.721619
HA350	0.530756	2.03457	31.8454	0.973053	2.31006	24.5032	62.9831	37.9494	3.16235	55.9063	59.613	65.7253	12.7436	0.0201242	1.32689
HB350	0.549333	2.10578	31.9529	1.00711	1.9659	23.3466	52.2782	37.5897	2.47361	54.1093	61.0915	60.335	12.622	0.0499473	1.46489
HC350	0.552093	2.3924	40.8549	0.82814	1.9899	23.3719	68.8276	47.3561	2.46629	58.5219	60.4559	64.1348	12.2831	0.0363384	1.56426
HD350	0.549333	2.10578	34.5164	0.915555	2.4898	24.2622	60.6097	37.9287	2.59536	54.0177	62.1774	65.1875	12.5825	0.0383206	1.28178
HE350	0.457777	2.19733	36.256	0.823999	2.11078	24.8115	65.3706	43.7783	3.08567	57.7715	69.23	68.2088	14.4455	0.0605162	1.28178
HA351	0.528205	1.76068	31.1641	0.528205	2.06771	23.5931	63.9128	44.1749	2.23019	54.9333	71.4616	60.7435	14.5486	0.0376396	1.05641
HB351	0.622222	1.33333	31.1111	0.799999	2.50422	22.0444	61.511	36.277	2.74066	53.2444	56.1211	62.0444	12.6959	0.0388375	1.15555
HC351	0.722331	1.62524	31.8729	0.812622	2.03353	22.934	61.4884	39.0672	2.90155	52.6399	61.4306	60.0438	13.1314	0.0405519	1.17379
HD351	0.549333	1.73955	28.7484	0.823999	1.57512	23.9875	64.1804	41.2876	2.64414	48.5244	64.705	55.4826	13.3894	0.0715334	1.09867
HE351	0.640888	1.83111	30.488	0.823999	2.15334	21.5155	55.5742	38.222	2.31514	47.2426	61.1057	52.1866	12.8272	0.0315958	1.37333
HA352	0.557698	2.69554	39.3177	0.650648	2.52252	25.6541	63.2987	43.1575	3.04652	47.3114	54.633	68.0392	12.0095	0.0762557	0.743598
HB352	0.528205	2.20085	33.3649	0.704273	2.38208	21.9205	62.064	37.9673	3.08836	48.2427	56.0342	61.5358	12.4059	0.0384079	0.616239
HC352	0.3644	2.6419	32.5227	0.8199	2.05419	24.3237	63.4967	43.0701	2.278	57.0286	68.3967	62.6768	13.9489	0.0659468	0.7288
HD352	0.5466	2.6419	37.1688	0.8199	2.0685	23.4127	64.0433	44.4584	3.00658	52.5647	67.9839	65.592	14.8015	0.0414319	0.8199
HE352	0.640888	2.74666	33.6924	1.00711	3.03042	23.2551	62.2577	39.0905	2.55487	54.2008	57.2422	69.4906	12.9507	0.0474793	0.732444
HA353	0.446612	1.6078	34.0318	0.625257	2.63791	23.3131	54.1294	38.6984	2.44751	53.4148	58.7544	66.7238	12.9089	0.0407822	0.714579
HB353	0.815841	1.99428	43.3302	0.543894	2.67271	26.1976	73.335	44.2568	2.65109	53.6642	59.8319	79.0459	13.4587	0.0529348	0.90649
HC353	0.535934	2.05442	35.5503	0.535934	2.70071	26.7074	59.1314	38.4825	2.33135	51.7177	51.0073	71.8152	11.7607	0.0750009	0.803902
HD353	0.61329	2.54077	36.0089	0.525677	2.04025	27.5104	69.3018	42.972	2.54988	56.5103	55.303	65.7973	12.9642	0.0812878	0.700903
HE353	0.442297	1.50381	30.3416	0.530756	2.4225	23.1764	53.7833	37.454	2.98393	43.6105	54.765	61.3908	12.0889	0.061295	0.619216
HA354	0.266666	1.86666	26.9333	0.799999	0.550106	25.4222	55.9999	45.2205	1.4228	53.6888	75.3436	45.4222	14.9604	0.0304082	0.71111
HB354	0.35729	1.96509	29.3871	0.803902	0.643071	22.5986	46.3583	43.5444	1.99167	56.0945	70.3628	46.3583	14.7833	0.0583945	0.714579
HC354	0.35729	2.14374	27.5113	0.714579	0.929502	25.3676	58.2382	44.982	1.77679	53.4148	73.3781	49.4846	14.8591	0.0320245	0.714579
HD354	0.366222	1.73955	28.4737	0.823999	0.660288	27.7413	58.3208	42.4053	1.99874	55.3911	74.792	45.1368	15.3636	0.0629853	0.640888
HE354	0.44017	2.02478	28.6991	0.792307	1.08594	26.6743	60.7435	39.853	2.04615	53.1726	68.2836	49.2991	14.4186	0.0718276	0.616239
HA355	0.376965	1.79059	27.0473	0.565448	1.01045	26.5761	54.1888	46.6341	1.90921	57.6757	72.2251	51.6443	15.1357	0.0570459	0.659689
HB355	0.445959	1.33788	28.6306	0.586564	0.730213	27.1143	61.8992	39.1292	1.63101	53.2475	72.291	42.9013	15.3021	0.0754662	0.713535
HC355	0.452349	1.62846	27.4124	0.452349	1.08861	25.0601	56.996	47.5166	1.81661	53.1058	76.5533	48.4014	15.3643	0.0349673	0.633289
HD355	0.544973	2.27072	25.7046	0.544973	0.243458	29.4285	56.9497	47.7504	2.02213	55.1331	72.4172	49.7742	15.1966	0.0463827	0.726631
HE355	0.457092	1.55411	28.5225	0.457092	1.31895	25.6886	53.0226	47.4695	1.98186	52.8398	80.7331	50.1887	16.3548	0.0499785	0.731347
HA356	0.277441	2.58945	30.9809	0.739842	0.992148	29.0388	59.5573	42.0575	2.35518	56.9678	67.5601	50.8641	14.2003	0.0655197	0.647362
HB356	0.369921	2.40449	26.2644	0.832322	1.03859	25.8945	56.043	40.727	1.81019	53.2686	74.718	47.0725	15.3576	0.0722169	0.647362
HC356	0.35729	2.59035	29.7444	0.803902	0.761368	28.4938	62.5257	46.1592	1.89945	57.077	73.0193	50.2885	15.1127	0.0638798	0.535934
HD356	0.271947	2.17558	26.5601	0.725192	1.01078	27.376	52.3951	39.9058	1.87638	52.1232	69.6027	43.8741	14.5781	0.0966993	0.634543
HE356	0.369921	2.40449	30.0561	0.832322	1.06644	28.7614	65.2911	35.5105	2.64902	57.8926	67.4627	49.3845	14.9195	0.105947	0.554882
H1357	0.470239	1.22262	24.1703	0.470239	1.0812	24.1703	51.256	37.2808	2.3518	49.0929	62.4593	41.0048	13.2783	0.0482858	0.564286
H2357	0.353838	1.32689	26.0071	0.442297	1.25699	22.0264	49.1834	38.1987	1.88092	49.095	62.2466	43.4336	12.9013	0.0768594	0.796134
H3357	0.440806	1.1461	26.801	0.440806	0.513024	26.7129	52.9849	41.0431	2.33837	54.2192	72.5251	46.1083	14.6495	0.057112	0.793451
H4357	0.473644	1.51566	28.0397	0.473644	1.06447	25.1979	55.5111	41.4346	2.20266	52.1009	61.7904	44.6173	12.901	0.0720633	0.85256
H5357	0.548236	1.73608	25.3102	0.456864	0.921671	21.7467	52.0824	42.0978	2.33492	50.1636	61.9231	41.4832	12.7447	0.0720317	0.913727
H1358	0.353155	1.41262	27.8993	0.529733	1.3725	19.5118	41.6723	35.5476	2.42822	38.4939	52.7295	43.9678	11.305	0.0370441	0.794599
H2358	0.438484	1.49085	32.3601	0.438484	1.21281	20.4334	49.2856	42.1376	3.29695	44.55	57.5095	53.0566	12.363	0.0623129	0.701574
H3358	0.441657	1.6783	29.7677	0.441657	1.31656	19.0796	37.6292	37.103	3.12785	42.8407	58.3355	51.4089	12.2078	0.0556542	0.706651
H4358	0.458236	1.558	29.1438	0.458236	1.22428	20.6206	41.9744	37.2849	3.47739	42.9825	63.4837	51.3224	13.0077	0.0776834	0.916471
H5358	0.453469	1.4511	33.5567	0.453469	1.7148	23.6711	46.798	39.0003	2.66903	47.6143	53.6194	50.2444	11.5727	0.0531007	0.725551
HA359	0.533333	1.51111	34.9333	0.71111	1.15498	25.8666	62.4888	44.5301	3.89195	50.3999	65.6011	57.511	13.3801	0.0505691	0.799999
HB359	0.448801	1.70544	34.9167	0.538562	1.17036	21.1834	56.549	45.6244	2.89174	46.5856	62.8799	56.1002	13.4784	0.0552102	0.718082
HC359	0.457777	1.73955	31.5866	0.823999	1.26027	25.2693	64.1804	42.216	4.42157	49.8062	66.3237	64.0888	14.4721	0.0498853	0.732444
HD359	0.453245	1.63168	31.9991	0.543894	0.890283	22.7529	56.2024	46.8794	3.16141	47.772	68.637	51.8512	13.9194	0.0518513	0.815841
HE359	0.446612	1.51848	31.5308	0.535934	0.983108	22.2413	49.2166	46.0304	3.07266	48.9487	66.3691	48.8594	13.59	0.0313819	0.714579
HA360	0.444444	1.77778	32.5333	0.622222	0.758624	23.3778	59.111	41.0107	2.56147	48.8888	56.826	59.5555	12.6012	0.0836627	0.622222
HB360	0.549333	2.01422	36.6222	0.823999	1.19841	28.1075	64.7297	42.3619	2.35972	47.1511	60.4653	63.0817	13.1038	0.0653382	0.640888
HC360	0.457777	2.01422	32.2275	0.640888	1.28365	26.9173	56.3066	43.1492	1.62991	48.5244	59.608	57.863	12.6855	0.0393883	0.549333
HD360	0.444444	1.77778	31.3777	0.71111	0.934745	25.6	55.7333	43.1352	2.15377	46.1333	62.0355	55.9999	13.4112	0.0579501	0.533333
HE360	0.549333	2.01422	32.0444	0.732444	1.30757	28.84	58.2293	46.1275	1.94893	47.7004	60.2151	63.7226	13.1289	0.0570015	0.549333
HA361	0.629247	2.3372	29.6645	0.71914	1.3515	25.889	56.6322	40.8345	2.37188	45.3058	54.9798	56.0929	12.2045	0.0878738	0.629247
HB361	0.631417	2.16486	34.6377	0.631417	1.70596	28.053	59.1728	43.0914	2.55658	47.9877	53.1794	69.5461	12.4189	0.0979773	0.541215
HC361	0.734648	2.29577	30.7634	0.642817	1.41963	26.9983	59.3228	42.9649	2.98827	41.5994	59.6604	61.5267	13.1154	0.0695237	0.550986
HD361	0.632664	2.44027	30.0967	0.723044	1.4389	26.7526	61.8203	42.0531	3.43134	44.3768	54.5349	70.4064	12.4745	0.0952889	0.632664
HE361	0.539355	1.70796	30.114	0.71914	0.969669	26.6981	62.2955	43.5684	2.61422	46.834	65.1754	62.7449	14.5382	0.0429166	0.539355
HA362	0.451903	1.71723	29.2833	0.542283	1.44185	23.7701	56.8493	38.1105	3.75696	41.0328	68.7834	55.584	14.4989	0.0655231	0.451903
HB362	0.45732	1.73782	31.2807	0.365856	0.985576	21.8599	60.0918	41.1219	3.47853	43.0795	71.9805	54.2381	14.7289	0.0433792	0.640248
HC362	0.368062	1.28822	30.2731	0.368062	1.50075	19.0472	61.6504	42.0849	3.34224	40.7629	69.7403	54.2892	14.8748	0.0699111	0.552093
HD362	0.557415	1.85805	30.9365	0.464513	1.2689	22.1108	57.9712	44.1947	3.80925	42.2707	69.5743	51.5609	14.7697	0.0422857	0.557415
HE362	0.361166	1.53495	28.9835	0.361166	0.825811	24.469	61.5787	46.1066	3.30899	43.3399	75.7983	53.1816	14.9657	0.0514203	0.541748
HA363	0.538562	1.97473	29.7106	0.628322	0.638774	23.0684	63.9093	44.6314	3.58262	44.162	70.156	52.0609	14.6625	0.0348055	0.897603
HB363	0.471935	1.51019	30.959	0.755097	1.33392	23.5024	59.6526	40.4907	4.33693	42.663	71.0157	59.2751	15.0311	0.0641102	0.755097
HC363	0.535934	1.6078	28.4938	0.625257	1.08285	22.4199	60.4713	42.1207	3.60109	41.0883	71.0844	55.1119	14.4164	0.058242	0.803902
HD363	0.541215	1.62364	32.0219	0.631417	1.10577	21.6486	60.9768	42.8625	4.39914	45.6424	71.4052	58.7218	14.893	0.0432492	0.721619
HE363	0.563418	1.59635	30.8002	0.657321	1.71721	21.0343	64.1358	43.5337	4.00991	46.5759	70.5258	56.7174	14.6256	0.0600387	0.751224
HA364	0.446612	1.16119	30.0123	0.535934	1.07537	21.884	38.7659	34.3334	3.16773	46.001	75.663	59.578	14.286	0.097996	0.893224
HB364	0.352136	1.05641	32.2205	0.352136	0.900847	24.0333	61.888	40.8487	3.65931	44.6333	72.9133	57.4863	14.9337	0.0557224	0.616239
HC364	0.352136	1.23248	33.1889	0.352136	1.11417	24.8256	57.6623	42.121	4.14034	42.8726	75.9728	57.1341	15.3637	0.0472483	0.528205
HD364	0.474381	1.32827	31.404	0.474381	1.40013	23.1498	39.1838	40.9634	3.38065	40.7967	70.9536	56.1667	14.4179	0.0725753	0.664133
HE364	0.368062	1.1962	32.0214	0.460078	0.946251	23.464	48.5842	42.3386	3.18683	41.9591	74.1942	52.9089	15.1228	0.0597261	0.82814
HA365	0.448801	1.70544	29.9799	0.628322	1.18966	23.8762	56.908	38.5337	2.81546	40.4819	67.2203	50.9838	14.2739	0.090492	0.628322
HB365	0.443798	1.68643	28.2255	0.710076	1.12878	25.1189	53.0782	36.181	3.57119	38.1666	68.0504	57.96	14.4023	0.0511796	0.532557
HC365	0.447923	1.79169	31.0859	0.537508	1.10096	23.5607	59.9321	42.961	3.338	40.5818	65.9159	52.4966	14.3512	0.0434076	0.627092
HD365	0.44683	1.69795	31.9037	0.536196	0.96568	24.9331	65.5053	37.9525	4.01554	42.4488	75.7598	59.4284	16.1592	0.0387597	0.625562
HE365	0.453694	1.36108	31.8493	0.544433	1.07747	24.1365	57.8006	42.4581	3.88839	44.1898	67.2668	52.3563	14.5953	0.0825213	0.635172
HA366	0.35729	1.51848	29.2084	0.535934	1.35299	21.2587	47.7875	40.2258	2.54245	46.0904	71.0339	54.844	14.427	0.074398	0.625257
HB366	0.362596	1.35973	25.6537	0.634543	1.46368	20.3054	37.438	38.0918	2.51746	46.3216	70.703	55.8398	14.774	0.104587	0.634543
HC366	0.35729	1.6078	30.7269	0.625257	1.36947	22.5092	50.3778	43.4589	2.56574	50.4672	61.5283	62.615	13.8206	0.0548693	0.625257
HD366	0.451012	1.53344	28.955	0.541215	1.01127	17.4091	33.4651	43.5082	2.19159	45.3718	70.1569	54.3019	14.7971	0.0464978	0.631417
HE366	0.375612	1.69025	30.7063	0.563418	1.33285	22.255	47.421	45.2916	2.21669	49.9564	65.7371	53.3369	13.6919	0.0473041	0.657321
HA367	0.456636	1.46123	27.5808	0.821944	1.49704	20.5486	44.7503	39.2537	3.09901	45.4809	65.1988	56.8968	13.8843	0.078188	0.821944
HB367	0.447048	1.60937	29.8628	0.715277	1.67613	19.5807	41.4861	38.247	2.98925	47.1189	66.7336	59.4574	14.3707	0.0896807	0.894096
HC367	0.63204	2.0767	29.435	0.812622	1.003	19.0515	38.8253	42.0163	2.3816	47.1321	65.5172	54.2651	13.8199	0.0441925	0.812622
HD367	0.450347	1.53118	28.9122	0.720554	1.47438	16.843	38.6397	39.4783	2.21254	45.6651	72.6418	56.9238	14.7408	0.107517	0.720554
HE367	0.461004	1.56741	26.646	0.553205	1.31355	19.4544	41.8592	39.3883	2.07836	48.1289	72.1977	56.7957	15.117	0.104716	0.829808
HA368	0.374843	1.59308	28.9566	0.655976	1.22462	16.5868	3.37359	39.5046	3.95825	48.5422	64.073	53.0403	13.6784	0.0632655	0.843397
HB368	0.35729	1.69713	31.7095	0.535934	0.969626	23.4025	52.7895	43.6204	3.63891	51.0924	65.1283	56.9877	13.8581	0.0311944	0.714579
HC368	0.455727	1.91405	32.0831	0.638017	1.55411	24.7004	54.596	38.7633	4.31306	50.0388	59.2313	55.5986	13.0509	0.087446	0.638017
HD368	0.374843	1.49937	34.017	0.843397	1.5954	26.8013	58.9441	35.4793	4.17363	53.3214	58.0102	61.7554	12.8128	0.0602908	0.843397
HE368	0.367508	1.47003	31.5138	0.643139	0.813433	22.2342	34.4539	46.172	3.46921	52.1862	69.2313	49.1542	14.5708	0.0677589	0.826893
HA369	0.552649	1.84216	31.1325	0.644757	0.964193	22.0138	49.6463	44.0533	2.96358	46.6988	68.1208	52.2253	14.0432	0.0667659	0.828973
HB369	0.551262	1.56191	31.7895	0.551262	0.787336	24.623	51.9105	46.6766	3.39479	50.1649	73.0095	56.3206	15.4046	0.0640569	0.551262
HC369	0.462635	1.85054	31.7368	0.555162	1.06631	24.5197	46.2635	46.6795	3.88003	52.3703	69.7201	52.9254	14.5823	0.0725017	0.555162
HD369	0.45079	1.26221	27.7687	0.631106	1.00879	16.4088	27.0474	39.7803	4.33084	50.218	74.5282	55.898	15.693	0.0987147	0.721264
HE369	0.634229	2.1745	38.5067	0.634229	1.01378	27.0906	50.3759	39.9771	4.35226	54.4531	74.8969	60.9766	15.7707	0.0992031	0.724833

## Sheet: Metab-roasted
	Propionic_acid	Lactic_acid	Quinic_acid	Acetic_acid	Hydroxyacetone	Acetone	GABA	Malic_acid	Choline	Caffeine	Theophylline	Myo_inositol	Glycolic_acid	Trigonelline	2_furylmethanol	5_CQA	Sucrose	Citraconic_acid	Chlorogenic_acid	Fumaric_acid	Xanthine	Formic_acid	N_methyl_pyridinium	Nicotinic_acid	5_hydroxymethylfurfural
334A	1.22074	11.0806	114.186	56.8113	24.3209	0.281709	0.233428	0.375612	4.50735	44.5382	1.49208	7.23053	31.6453	26.7624	4.03783	21.5144	4.78905	1.50245	6.7963	0.469515	1.87806	48.6418	2.06587	0.204317	3.1927
334B	0.762962	9.82314	113.3	55.5055	23.175	0.286111	0.291413	0.381481	4.38703	43.0222	1.71118	11.6352	33.475	26.799	3.81481	20.4533	4.00555	1.81204	7.49859	0.381481	2.09815	45.4916	1.90741	0.28867	3.14722
334C	0.257903	9.71433	113.735	55.1912	23.6411	0.171935	0.521915	0.34387	4.64225	49.1601	1.54337	11.8635	34.0432	26.6499	3.86854	19.5872	4.12644	1.80532	7.22095	0.429838	1.97725	47.712	1.97725	0.241571	3.09483
334D	0.180405	9.20065	103.823	50.1525	20.7466	0.180405	0.444481	0.36081	3.33749	40.2349	1.58527	6.31417	27.5117	25.2567	3.7885	17.8736	4.51012	1.62364	6.09751	0.36081	1.80405	41.5833	1.98445	0.230194	2.61587
334E	1.10206	9.57941	115.885	54.9333	25.093	0.254321	0.392047	0.423868	4.23868	46.8243	2.07331	11.6988	28.823	26.3646	4.1539	19.3272	4.74732	1.86502	7.22101	0.508641	1.78024	50.2707	2.79753	0.25458	2.8823
335A	1.15998	10.357	124.283	55.3476	24.2767	0.248567	0.404308	0.331422	6.04846	50.1892	1.56441	11.2684	36.5393	26.0995	3.97707	19.8991	4.14278	1.24283	7.40753	0.414278	2.07139	48.9677	1.85672	0.181165	3.14851
335B	1.05641	9.59572	112.243	53.5247	23.329	0.264102	0.304992	0.44017	4.1376	34.0556	2.01042	10.8282	30.5478	24.4735	3.96153	18.2852	3.6094	1.58461	7.0254	0.44017	1.76068	47.1863	1.84872	0.285429	3.25726
335C	1.13354	10.8995	114.488	58.4211	26.0715	0.261587	0.3734	0.348783	5.49333	38.544	1.97198	11.6842	33.4831	25.8099	4.18539	18.8348	3.83661	1.65672	7.23776	0.435978	1.74391	50.7479	1.83111	0.244522	3.74941
335D	1.14444	10.2182	113.954	55.0968	24.769	0.245238	0.306632	0.40873	6.0492	41.8839	1.65491	11.9349	30.9817	28.2024	4.00555	18.1219	3.92381	1.63492	6.40398	0.490476	1.71666	48.5571	2.04365	0.276475	3.10635
335E	0.167225	9.5318	108.278	51.9232	22.5753	0.250837	0.326421	0.334449	5.26757	45.5478	1.5882	11.0368	28.679	23.9131	3.92978	19.1492	4.43145	1.42141	6.87369	0.418061	1.75586	44.8998	1.67225	0.283941	2.75921
336A	0.326984	10.0548	109.131	56.2412	24.6055	0.245238	0.360055	0.326984	3.92381	44.4732	1.48973	6.70317	31.1452	25.6682	3.84206	18.7793	3.76031	1.30794	6.54329	0.40873	1.9619	51.0912	1.79841	0.189279	2.77936
336B	0.187806	10.3293	115.407	53.3369	22.8184	0.281709	0.294043	0.375612	2.91099	33.4587	1.64057	5.82199	30.3307	25.3538	3.75612	20.0399	3.47441	1.59635	7.39504	0.375612	1.87806	46.1064	1.86952	0.193796	2.81709
336C	0.190741	9.6324	110.82	50.9277	21.2676	0.286111	0.461899	0.381481	3.14722	37.8598	1.46243	10.9676	28.2296	25.0824	3.91018	19.0566	3.91018	1.90741	7.36241	0.381481	1.81204	41.9629	1.90741	0.337055	2.47963
336D	1.10718	9.62397	112.422	51.2711	20.781	0.255504	0.273041	0.340671	4.08806	44.2884	1.38806	10.9015	27.0834	26.3169	3.57705	17.9722	4.25839	1.61819	6.47084	0.425839	1.87369	42.9246	2.04403	0.191389	2.29953
336E	1.12684	10.1415	116.252	52.1162	21.7855	0.281709	0.429777	0.375612	3.38051	40.1535	1.4392	10.8928	31.6453	25.2599	3.75612	18.8319	3.94393	1.59635	6.72517	0.375612	1.87806	43.571	1.87806	0.242625	2.72319
337A	1.08243	9.83206	113.655	52.3174	23.182	0.270607	0.242796	0.36081	5.05134	43.4808	1.62425	10.7341	29.857	27.9628	3.8787	19.8481	5.41215	1.62364	6.66146	0.451012	1.71385	44.56	2.16486	0.282926	2.88648
337B	1.19235	10.2201	108.589	54.8481	22.5695	0.170336	0.177309	0.425839	4.5139	40.5535	1.88789	11.5828	31.6824	24.7838	4.00289	18.0997	3.83255	1.53302	6.98267	0.425839	1.87369	48.205	2.04403	0.32606	2.98088
337C	0.248567	10.2741	110.115	55.8447	23.9453	0.248567	0.374397	0.414278	4.88848	43.2393	1.97991	11.5169	30.6566	25.9338	3.89421	18.5074	4.05993	1.15998	6.55424	0.414278	1.82282	47.9734	1.90568	0.248496	3.31422
337D	0.289122	10.1193	112.951	50.8856	21.0096	0.192748	0.476938	0.385497	3.46947	38.835	1.27075	10.6012	27.7558	25.7319	3.75859	19.5225	4.52959	1.54199	6.71732	0.385497	1.73473	39.8025	2.02386	0.230488	2.69848
337E	0.188774	9.43871	112.037	52.4792	22.3697	0.188774	0.452581	0.377548	3.6811	40.2531	1.52108	10.9489	29.0712	25.6733	3.77548	20.1144	5.38006	1.60458	7.40245	0.377548	1.60458	43.3237	1.60458	0.228863	3.11477
338A	1.25051	10.54	114.869	61.9897	26.2608	0.267967	0.472137	0.446612	6.60986	48.4411	1.76474	12.7731	32.424	28.1366	3.93019	19.1286	5.71663	1.6078	7.02325	0.535934	1.51848	55.6479	1.96509	0.257771	4.55544
338B	0.283161	10.477	114.02	58.8975	25.6733	0.283161	0.381249	0.377548	5.0969	41.3706	2.04039	11.8928	30.6758	28.2217	4.15303	20.0798	5.66322	1.22703	7.37414	0.471935	1.51019	50.8746	1.79335	0.230715	4.15303
338C	1.21451	10.4635	112.763	61.0993	26.2521	0.373696	0.105258	0.46712	4.6712	41.6577	1.92271	12.332	35.8748	27.1864	4.01723	18.2126	4.76462	1.77505	6.46036	0.46712	1.68163	53.4385	1.77505	0.238991	4.01723
338D	0.280272	9.99636	120.517	58.7637	26.1587	0.280272	0.262022	0.373696	6.35283	47.9433	2.02862	12.7057	32.4181	29.9891	4.11065	19.6274	7.10022	1.40136	7.0721	0.46712	1.58821	53.3451	1.77505	0.159474	4.2975
338E	1.32689	10.7036	115.174	65.6369	26.2724	0.176919	0.348335	0.442297	7.69597	53.234	1.76444	12.6497	33.7915	29.7224	4.15759	18.4771	6.81137	1.50381	7.27035	0.619216	1.68073	56.3486	2.03457	0.196703	4.24605
339A	1.19022	9.61332	108.127	60.4266	23.8044	0.274666	0.336152	0.457777	5.12711	45.1961	1.61499	12.36	36.5306	26.9173	4.02844	17.2692	3.75377	1.73955	6.31383	0.457777	1.73955	56.3066	1.92266	0.250636	3.66222
339B	1.27752	10.0498	114.38	59.1065	24.1877	0.255504	0.388726	0.425839	6.21725	44.5333	2.12041	12.69	35.0892	27.8499	4.00289	16.5963	4.42873	1.36269	6.48227	0.596175	1.61819	53.3151	2.1292	0.144188	3.23638
339C	0.366222	10.712	109.683	63.9973	26.1849	0.274666	0.381992	0.457777	4.21155	39.9725	2.08601	12.7262	37.904	27.7413	4.21155	17.5767	3.84533	1.83111	6.11396	0.549333	1.83111	56.8559	2.01422	0.293952	3.84533
339D	1.84031	9.20155	112.351	65.423	27.0526	0.184031	0.366331	0.460078	4.1407	35.1849	2.18341	13.1582	40.7629	30.0891	4.23271	18.1229	5.3369	1.65628	7.41785	0.644109	1.56426	55.1173	2.30039	0.317564	4.41675
339E	0.267967	10.6294	123.979	59.3101	24.9209	0.178645	0.555241	0.446612	5.35934	39.7817	1.76903	12.0585	34.2105	28.4938	4.10883	17.3666	4.46612	1.51848	6.09687	0.535934	1.87577	50.1992	2.14374	0.147228	3.5729
340A	1.2956	11.3149	119.627	60.5475	26.0847	0.259119	0.268791	0.431865	6.7371	42.7494	1.85404	11.9195	38.7815	27.0348	3.88679	17.5164	4.23228	1.2956	6.01876	0.518238	1.64109	50.8737	2.15933	0.149324	4.14591
340B	1.15649	10.1193	120.468	58.1136	25.7319	0.289122	0.351993	0.385497	6.07157	47.4779	1.77238	8.09543	31.5144	28.334	4.04771	20.5884	7.51718	1.73473	7.18098	0.481871	1.34924	53.4877	1.92748	0.31158	4.14409
340C	1.16525	10.4873	111.614	60.3434	27.7996	0.249697	0.324174	0.416161	6.65858	44.1967	1.92331	12.3184	34.2917	25.9685	3.91191	18.4654	5.1604	1.58141	6.5261	0.499393	1.58141	53.6016	1.84939	0.257356	4.24484
340D	1.11758	9.37046	107.975	59.6615	26.6499	0.34387	0.385959	0.429838	6.87741	52.1083	1.89221	12.0355	28.3693	27.2517	4.04048	18.0773	5.75983	1.63338	6.9785	0.515805	1.63338	56.2228	1.71935	0.216965	3.61064
340E	1.31464	10.5171	115.595	62.0699	25.9172	0.281709	0.228817	0.469515	6.76102	46.2163	1.93073	7.88785	35.5892	28.3587	4.03783	18.5388	5.82199	1.31464	6.7916	0.469515	1.78416	53.9942	2.15977	0.200852	4.03783
341A	1.23981	10.1092	106.815	61.037	24.7009	0.286111	0.374341	0.381481	3.14722	32.0428	1.62656	7.62962	41.2953	28.0389	4.10092	16.0002	3.71944	1.90741	6.16362	0.476851	1.81204	52.2629	1.97222	0.207761	3.43333
341B	1.08202	10.4873	106.953	66.0864	26.9672	0.249697	0.345348	0.499393	4.99393	40.5608	1.90602	12.4848	38.8695	25.8852	4.07838	15.6929	3.91191	1.58141	5.86138	0.582626	1.74788	58.1793	1.91434	0.215339	3.99515
341C	1.78645	10.7187	112.546	59.4887	25.0996	0.267967	0.43024	0.35729	3.5729	33.7931	1.70849	11.4333	33.8532	26.4394	3.93019	17.0634	4.01951	1.6078	6.35048	0.446612	1.69713	49.038	2.05442	0.293509	3.5729
341D	0.71111	11.0222	110.133	61.511	25.3333	0.266666	0.391637	0.444444	3.73333	37.4608	1.80739	12	40.8888	26.1333	4	16.047	4	1.68889	5.96399	0.533333	1.68889	49.1555	2.13333	0.239096	3.82222
341E	0.261587	10.3763	113.442	60.0778	26.5075	0.261587	0.431422	0.523174	4.27259	37.077	2.09573	12.8178	34.7911	26.1587	4.0982	16.523	4.35978	1.9183	6.49527	0.523174	1.48233	56.7644	1.83111	0.1372	4.18539
342A	0.253149	9.28212	105.141	49.5328	21.4333	0.253149	0.294258	0.337532	3.4597	40.3828	1.73115	11.0542	33.8375	25.9899	3.54408	16.7199	3.71285	1.51889	5.99398	0.421915	1.85642	44.6386	2.27834	0.258905	2.53149
342B	1.15998	10.1912	111.275	55.2647	24.9395	0.331422	0.264219	0.414278	4.14278	42.6182	2.17165	12.5112	32.4794	28.2538	3.89421	18.5706	4.22564	1.57426	6.64953	0.497134	1.57426	48.3048	2.2371	0.317304	3.47994
342C	1.22658	10.1631	113.283	55.0209	22.4289	0.262839	0.379147	0.350452	4.20542	48.8269	1.67212	6.74619	35.5708	29.2627	4.11781	17.7797	3.85497	1.13897	7.00343	0.525677	2.10271	46.7853	2.45316	0.289554	2.62839
342D	1.22074	10.5507	110.128	54.1485	25.3739	0.261587	0.354249	0.435978	4.0982	44.5284	1.90783	7.76041	33.6575	30.4313	3.92381	20.5764	4.27259	1.13354	7.195	0.523174	1.74391	46.7369	2.17989	0.231274	3.48783
342E	1.20835	10.4104	117.117	56.5134	23.8881	0.278849	0.408185	0.464749	3.99684	45.4272	1.87844	7.99367	35.135	30.6734	4.18274	19.109	4.64749	1.95194	6.94186	0.464749	1.85899	47.962	2.41669	0.260415	2.88144
343A	0.262839	9.63742	109.166	52.3925	21.3775	0.262839	0.364711	0.438064	4.20542	36.8205	1.57688	7.53471	28.0361	25.7582	3.94258	17.4294	4.03019	1.13897	6.09274	0.525677	1.83987	44.6826	2.10271	0.257654	2.80361
343B	1.09698	9.53527	104.804	50.7985	21.602	0.168766	0.114507	0.421915	5.06297	38.7447	1.61784	11.0542	26.1587	27.6776	3.966	18.3991	4.13476	1.51889	6.94864	0.421915	1.60328	42.1915	2.27834	0.263602	2.86902
343C	1.23339	10.721	120.018	54.2691	22.6754	0.189752	0.105917	0.474381	5.50281	42.2504	1.95258	12.5236	32.7323	31.1194	4.26943	19.8111	4.26943	1.70777	7.34335	0.569257	1.9924	46.0149	2.46678	0.331641	2.75141
343D	0.270607	9.83206	104.454	52.7684	21.5584	0.270607	0.447069	0.451012	4.23951	38.3272	1.78075	11.3655	25.1665	27.0607	3.96891	17.1833	4.32972	1.71385	5.83941	0.451012	1.71385	42.2147	2.16486	0.279755	2.70607
343E	0.274666	10.4373	122.959	59.1448	24.6284	0.274666	0.40774	0.457777	6.50044	49.4503	1.98424	13.2755	30.3964	32.5022	4.57777	20.1044	5.03555	1.37333	7.52533	0.549333	2.01422	50.7217	2.38044	0.310489	3.11289
344A	0.255504	9.45363	108.504	54.6778	24.1877	0.255504	0.44282	0.340671	4.85457	42.3264	1.86496	10.7312	27.3389	29.6384	4.17323	18.2238	4.17323	1.61819	6.33004	0.425839	1.70336	43.6059	1.95886	0.287589	3.15121
344B	1.08779	10.4246	118.478	54.0268	23.5687	0.271947	0.281667	0.362596	5.34829	39.6382	1.92478	11.3311	31.0019	29.5516	3.89791	18.6043	4.89504	1.45038	6.38116	0.453245	1.63168	43.1489	2.17558	0.175687	3.35401
344C	1.23248	10.6521	123.072	58.8948	27.1145	0.264102	0.352684	0.44017	5.63418	44.8127	2.18211	13.1171	32.7487	30.988	4.22564	19.4255	3.78547	1.76068	6.85355	0.528205	1.76068	50.3555	2.20085	0.27916	3.6094
344D	1.28349	10.8669	114.487	57.0724	27.0388	0.256698	0.366315	0.427829	5.90404	43.8159	2.23829	13.2627	37.2211	30.8037	3.85046	21.2526	5.64735	1.19792	7.33823	0.513395	1.62575	51.5962	2.05358	0.221273	4.27829
344E	1.05797	9.11485	99.0427	51.9221	22.7058	0.244148	0.32425	0.406913	4.72019	43.5067	1.55944	10.7425	26.5307	27.1818	3.82498	18.3123	3.90637	1.46489	6.38714	0.406913	1.62765	42.5631	1.95318	0.253956	2.92977
345A	1.14997	10.2613	119.862	53.6948	21.9379	0.265378	0.264016	0.442297	4.86527	47.4486	2.02893	11.7651	28.0416	32.1992	4.06913	19.5208	5.13064	1.59227	6.921	0.530756	1.85765	43.2566	2.3884	0.244446	2.74224
345B	1.28178	10.8035	131.657	56.3066	22.8889	0.274666	0.410163	0.457777	5.03555	50.6567	1.84944	13.0924	41.4746	33.6924	4.39466	19.0236	4.39466	1.648	7.35085	0.549333	2.10578	46.9679	2.74666	0.315232	2.83822
345C	1.23248	10.4761	116.645	54.9333	23.4171	0.352136	0.340789	0.44017	4.48974	46.1617	2.06372	13.029	32.0444	30.2837	3.8735	18.4189	4.22564	1.32051	6.97594	0.528205	1.84872	47.8905	2.20085	0.226502	3.25726
345D	1.21534	10.3709	115.052	57.1209	24.9549	0.243068	0.296672	0.405113	4.78033	49.4462	2.30192	12.7205	29.5732	30.1404	4.37522	20.3511	4.45624	1.37738	7.71917	0.567158	1.94454	50.8011	3.64601	0.256677	3.48397
345E	1.30794	10.6379	116.319	58.7699	24.4148	0.261587	0.40524	0.435978	4.62137	46.8802	1.97289	11.4226	32.6984	30.2569	4.44698	19.2889	4.18539	1.39513	7.14711	0.523174	2.0055	50.3119	3.13904	0.246321	3.22624
346A	1.13354	10.2019	119.022	57.9851	22.6709	0.174391	0.328005	0.435978	4.27259	42.8784	1.81107	11.597	27.4666	26.2459	4.0982	19.8872	4.011	1.39513	6.56429	0.435978	1.83111	49.4399	1.63598	0.322209	3.13904
346B	0.322662	10.1639	109.302	59.6119	23.877	0.322662	0.353616	0.322662	5.00127	46.9521	1.69908	10.8899	27.3456	26.2163	3.95261	19.0286	5.32393	1.12932	6.92454	0.483994	1.69398	53.4813	1.80333	0.209321	3.22662
346C	1.21534	9.64168	117.078	60.4428	23.0914	0.32409	0.295787	0.405113	4.94237	50.3267	1.3887	6.4818	28.925	25.8462	3.72704	17.7163	3.64601	1.37738	7.05382	0.486135	1.7825	54.2851	1.78614	0.235807	3.15988
346D	1.18136	9.78842	110.879	56.5365	23.3741	0.253149	0.437751	0.337532	4.72544	46.8907	1.54658	12.2355	30.4622	27.762	3.79723	18.5388	4.13476	1.26574	6.57375	0.421915	1.77204	50.2078	2.02519	0.280526	3.29093
346E	1.19022	9.97954	111.423	54.1093	21.7902	0.183111	0.265728	0.366222	4.21155	41.8114	1.18383	11.6275	34.9742	25.7271	3.84533	19.1709	4.02844	1.28178	6.48051	0.457777	1.92266	45.5946	2.01422	0.226583	2.74666
347A	1.07712	9.60435	110.315	54.1254	22.7991	0.269281	0.444053	0.359041	5.56514	47.7639	1.41645	11.3996	27.5564	26.21	3.76993	20.6612	4.66753	1.3464	7.22362	0.359041	1.70544	44.162	1.88497	0.162218	3.32113
347B	1.19022	10.0711	113.529	55.6657	22.9804	0.274666	0.396268	0.366222	5.49333	47.2201	1.36874	6.40888	30.7626	25.6355	3.84533	18.7052	4.94399	1.55644	6.84737	0.457777	1.73955	48.3413	1.94089	0.276185	3.38755
347C	0.187806	9.2025	112.59	53.1491	20.8465	0.187806	0.0549326	0.375612	4.50735	39.8565	1.54956	11.644	24.1331	27.2319	3.75612	19.1976	6.2915	1.59635	7.41596	0.375612	1.50245	44.2283	2.06587	0.258337	3.0049
347D	0.254321	8.986	105.797	52.051	20.0913	0.169547	0.36592	0.339094	5.08641	48.7791	1.18482	10.9358	29.7555	24.0757	3.56049	18.7172	4.32345	1.01728	6.86622	0.423868	1.69547	43.9975	1.87239	0.185472	2.62798
347E	1.19022	9.97954	119.205	57.3137	23.4382	0.274666	0.359816	0.366222	5.40177	50.899	1.43278	12.4515	29.9386	29.664	4.02844	18.9636	5.21866	1.55644	7.14381	0.457777	1.83111	51.1795	2.28889	0.207507	3.296
348A	0.192748	10.2157	112.276	57.5354	23.4189	0.289122	0.453572	0.481871	3.66222	40.6909	1.595	11.6613	27.0811	27.8521	4.33684	19.6256	5.01146	1.63836	6.47301	0.481871	1.83111	51.1747	2.12023	0.285595	2.89122
348B	1.14444	9.40078	112.564	56.4864	22.8889	0.326984	0.406236	0.326984	4.33253	50.3178	1.27661	11.4444	25.8317	26.7309	4.33253	18.2903	4.57777	1.55317	7.18852	0.490476	1.9619	51.173	1.79841	0.315471	2.77936
348C	0.286111	10.4907	110.82	58.8435	24.3194	0.286111	0.478028	0.381481	3.05185	33.7214	1.88949	12.112	30.0416	25.2731	4.10092	18.6191	4.00555	1.71666	7.12294	0.476851	1.81204	51.4999	1.81204	0.218016	3.5287
348D	0.381481	10.6815	122.169	59.4157	23.6518	0.286111	0.425933	0.381481	4.86388	54.3164	1.47133	12.875	32.6166	29.2787	4.00555	20.516	4.76851	1.52592	7.40165	0.476851	1.90741	50.5462	2.47963	0.23822	3.24259
348E	1.19942	10.235	108.187	59.0913	23.5086	0.399805	0.38569	0.399805	4.79767	46.564	1.34968	11.9142	30.6251	25.8274	3.83813	17.152	3.67821	1.27938	6.46239	0.479767	1.99903	53.0942	1.99903	0.234381	3.11848
349A	0.278849	9.75972	108.193	59.0231	23.2374	0.278849	0.249111	0.464749	4.18274	43.5627	1.43604	11.8046	31.1382	27.1413	3.99684	18.6133	3.90389	1.58014	7.36571	0.464749	1.67309	51.9589	1.95194	0.254517	3.53209
349B	0.262839	9.28696	109.779	53.8819	21.0271	0.262839	0.250775	0.350452	4.29303	42.1633	1.76327	11.2144	25.4953	24.5316	3.76735	18.4546	4.03019	1.22658	6.5423	0.438064	1.83987	45.1206	1.83987	0.264025	2.45316
349C	1.25664	10.861	118.484	57.8056	22.3503	0.359041	0.493283	0.448801	4.66753	47.7505	1.49697	7.71938	33.8396	27.1076	3.94945	18.3411	5.02657	1.3464	6.61491	0.538562	1.88497	49.0989	2.15425	0.238819	3.05185
349D	1.25664	10.3224	112.47	60.2291	24.1455	0.269281	0.414979	0.448801	4.84705	50.0306	1.45331	6.37298	34.7372	28.1847	4.03921	19.5799	4.03921	1.52592	7.00158	0.448801	1.88497	51.7917	2.15425	0.202799	3.59041
349E	0.190741	9.91851	116.924	55.124	21.5537	0.286111	0.295607	0.381481	4.38703	49.3789	1.20394	11.9213	32.4259	26.2268	3.91018	20.47	4.38703	1.43055	6.93977	0.381481	1.81204	45.587	2.00278	0.260729	2.95648
350A	0.274666	10.4373	96.8657	56.8559	24.4453	0.183111	0.48687	0.366222	3.57066	34.1417	1.51284	6.68355	33.5093	26.9173	3.93688	20.0644	3.66222	1.55644	7.24291	0.457777	1.83111	44.6791	1.92266	0.187124	4.21155
350B	0.266666	10.4	111.378	57.1555	23.8222	0.266666	0.50148	0.355555	4.17777	36.0637	1.58101	11.7333	29.6889	30.4889	3.73333	17.6942	5.95555	1.6	6.52348	0.444444	1.51111	44.8888	2.48889	0.290803	3.73333
350C	1.19022	10.8035	106.021	58.687	24.1706	0.366222	0.431684	0.366222	3.11289	27.7937	1.66464	10.9867	29.3893	27.9244	4.02844	17.0373	4.66933	1.83111	6.40751	0.549333	1.55644	44.2213	2.19733	0.243482	3.47911
350D	0.289122	10.2157	111.698	57.1499	24.7682	0.289122	0.392359	0.385497	2.79485	30.1019	1.5619	6.84257	31.5144	26.9848	3.95134	17.5759	4.52959	1.73473	6.49288	0.481871	1.63836	44.814	1.92748	0.251744	3.95134
350E	1.16525	11.1531	103.125	63.9224	26.5511	0.249697	0.421074	0.416161	3.41252	32.1508	1.84686	11.0699	31.7115	27.966	4.07838	16.5294	4.41131	1.91434	6.21041	0.499393	1.49818	49.7729	2.16404	0.182681	4.74424
351A	1.28178	11.8107	119.388	64.3635	25.2693	0.274666	0.22726	0.457777	5.31022	47.6821	1.40863	12.8178	36.256	29.2062	4.30311	20.3724	5.12711	1.92266	7.04872	0.549333	1.83111	50.2639	2.472	0.318467	4.21155
351B	1.22074	11.161	114.226	64.9608	25.5483	0.261587	0.365888	0.435978	5.23174	44.1435	1.45316	11.0739	32.6112	28.4258	4.27259	18.2823	5.14454	1.30794	6.36122	0.61037	1.65672	54.3229	2.17989	0.227498	4.0982
351C	1.19022	10.3458	112.155	58.687	23.6213	0.274666	0.453759	0.457777	4.48622	40.884	1.80423	8.4231	29.4809	31.5866	4.21155	20.1983	4.39466	1.37333	7.45249	0.457777	1.73955	44.8622	2.472	0.305337	3.75377
351D	1.19022	10.6204	119.846	60.7928	24.72	0.274666	0.354773	0.366222	5.40177	47.2841	1.71046	12.5431	30.8542	32.3191	4.02844	21.1145	6.50044	1.46489	7.37347	0.457777	1.648	47.5173	2.472	0.25451	4.02844
351E	1.19235	10.5608	113.103	58.6807	25.5504	0.255504	0.376294	0.425839	5.11007	46.4264	1.79565	11.8383	32.0231	30.4049	4.00289	20.4727	4.25839	1.27752	7.17274	0.425839	1.78853	45.7351	2.3847	0.223766	4.00289
352A	1.39513	12.1202	116.668	68.4486	27.1179	0.261587	0.333365	0.523174	4.62137	41.4981	1.73321	12.033	36.535	28.6002	4.44698	18.9573	3.92381	1.65672	7.10138	0.523174	1.9183	55.6308	2.17989	0.279707	4.44698
352B	1.32051	11.2684	138.037	65.0572	25.882	0.264102	0.230014	0.44017	5.89828	45.864	1.98708	11.4444	33.9812	33.0128	4.31367	19.4238	4.75384	2.02478	6.73892	0.44017	1.93675	51.676	2.55299	0.281179	4.04957
352C	1.30174	11.1082	118.979	61.7023	25.6876	0.173565	0.380941	0.433912	5.46729	42.4133	1.7971	11.976	33.5848	31.502	4.16556	17.3435	5.72764	1.56208	6.12007	0.520695	1.73565	49.3792	2.51669	0.286096	4.16556
352D	0.276047	10.4898	114.007	56.2215	24.1081	0.276047	0.425093	0.368062	3.86465	36.6632	1.69234	11.4099	29.1689	29.721	4.1407	20.3983	5.06085	1.65628	7.45207	0.368062	1.65628	42.3271	2.02434	0.128	3.68062
352E	0.270607	10.2831	110.949	61.4278	23.9036	0.270607	0.323646	0.451012	4.41992	38.7012	1.82457	11.8165	30.1276	29.2256	4.41992	17.137	5.59255	1.98445	6.86031	0.541215	1.62364	51.5056	2.34526	0.286625	3.7885
353A	0.256698	10.439	105.845	59.8105	25.2419	0.256698	0.341671	0.427829	4.36386	35.9816	2.08526	11.8937	33.3707	28.1512	4.02159	18.024	3.67933	1.45462	7.04216	0.513395	1.71132	51.3395	2.31028	0.293794	3.93603
353B	1.2716	11.5292	122.498	60.6131	27.5514	0.254321	0.365592	0.423868	4.74732	43.7573	1.67825	11.614	36.8765	30.5185	4.1539	19.63	6.27324	1.44115	6.60359	0.508641	1.52592	49.5925	2.28889	0.213255	4.57777
353C	1.24444	11.2889	111.911	64.6222	28.1777	0.266666	0.396724	0.444444	4.44444	38.957	2.01749	12.1778	40.4444	29.1555	4.26666	17.8842	4.53333	2.04444	7.1637	0.533333	1.6	54.2222	1.87778	0.304559	5.06666
353D	1.15555	10.6667	108.8	58.6666	24.8889	0.177778	0.260945	0.444444	4.53333	42.9803	1.64503	6.39999	32.6222	26.4	3.2	17.7095	4.44444	1.15555	6.06815	0.444444	1.68889	52.4444	1.77778	0.303201	3.91111
353E	0.274666	10.9867	124.79	60.1519	25.7271	0.274666	0.264157	0.366222	5.12711	50.2389	1.45545	5.67644	35.1573	30.9457	4.12	20.5415	6.31733	1.55644	7.31747	0.549333	1.92266	50.7217	2.38044	0.290795	3.66222
354A	1.20355	10.3161	112.789	56.9105	23.2112	0.171935	0.386731	0.429838	4.90015	47.6398	1.0568	11.7776	37.8257	30.2606	4.29838	19.7519	3.52467	1.37548	7.44634	0.601773	2.14919	49.8612	2.40709	0.282752	2.66499
354B	1.22074	9.85982	114.937	54.5577	21.0343	0.469515	0.296422	0.469515	4.69515	50.5965	0.961178	7.51224	35.2136	30.049	4.13173	20.9732	3.94393	1.50245	7.63534	0.469515	2.15977	43.2893	2.44148	0.271223	2.44148
354C	1.14997	9.73053	104.205	50.5103	22.1148	0.265378	0.204469	0.442297	4.06913	38.7729	1.29523	11.2343	30.9608	28.5724	3.89221	20.3145	3.89221	1.41535	7.63511	0.530756	1.76919	42.8143	2.29994	0.301226	2.74224
354D	1.24283	10.1084	119.146	55.1818	22.7024	0.414278	0.225261	0.414278	5.2199	48.614	0.970384	12.0969	32.728	31.7337	4.05993	20.8288	3.31422	1.32569	7.68875	0.497134	2.2371	45.7363	3.14851	0.34501	2.73424
354E	1.13897	9.63742	111.619	50.9907	21.5528	0.262839	0.448119	0.438064	4.64348	50.6834	1.08936	7.00903	31.1902	32.7672	4.11781	22.0424	4.7311	0.876129	8.09344	0.525677	2.0151	42.2294	2.97884	0.289826	2.45316
355A	1.19792	9.75451	120.905	52.9653	21.8193	0.171132	0.332728	0.427829	4.87725	51.9993	1.14129	11.7225	37.3067	30.2047	4.19273	20.5756	5.13395	1.19792	8.16207	0.598961	1.96801	43.9808	1.5134	0.274744	2.9948
355B	1.19022	10.0711	116.916	55.2995	24.0791	0.274666	0.513501	0.457777	4.94399	51.3166	1.17863	11.3529	32.136	31.9529	4.57777	24.0228	4.85244	1.648	8.2984	0.640888	1.92266	48.3413	2.472	0.329627	2.92977
355C	0.352136	9.41965	109.514	49.8273	21.4803	0.264102	0.444047	0.352136	4.48974	49.9915	1.08685	11.0043	31.6042	31.2521	3.96153	21.8568	5.01794	1.58461	7.94797	0.528205	1.84872	39.4393	2.11282	0.326801	2.46495
355D	1.09195	9.07155	112.722	50.8175	21.6709	0.251987	0.181596	0.419979	4.95575	49.9949	1.2023	11.0035	28.6426	33.0104	4.28379	21.3842	5.71172	0.923954	8.15797	0.503975	1.76391	42.9219	2.43588	0.325904	2.35188
355E	1.1962	9.84566	116.4	53.553	21.6237	0.184031	0.363353	0.460078	4.60078	47.8604	1.18731	12.1461	32.3895	32.2975	4.1407	23.1095	5.06085	1.47225	7.96645	0.552093	1.84031	43.4313	3.58861	0.311919	2.66845
356A	0.372555	9.31388	104.129	49.3636	20.5837	0.279416	0.37835	0.372555	4.37752	41.1398	1.03606	9.22074	25.52	26.7308	3.72555	20.8628	4.93636	1.39708	6.70029	0.465694	1.6765	41.3536	2.23533	0.249037	2.60789
356B	1.01728	8.22304	104.017	48.4057	19.4979	0.254321	0.40128	0.339094	4.06913	42.5476	0.997557	9.91851	23.8214	27.2971	4.06913	19.9815	5.34073	1.44115	7.08363	0.423868	1.69547	40.7761	1.86502	0.209799	2.28889
356C	0.186848	8.40815	106.503	49.3278	20.3664	0.46712	0.189238	0.46712	4.2975	44.223	1.22756	7.0068	23.356	29.8957	4.11065	21.0428	5.32516	1.49478	7.69891	0.46712	1.68163	40.546	2.05533	0.176767	2.24217
356D	1.07712	9.15555	107.533	49.6374	22.081	0.269281	0.282413	0.359041	4.30849	43.3846	1.25067	10.3224	25.5817	31.1468	4.03921	20.3314	4.75729	1.43616	6.98153	0.538562	1.79521	40.7512	2.24401	0.351816	2.51329
356E	1.18136	10.0416	111.976	51.9799	22.9522	0.253149	0.293857	0.421915	5.40051	47.531	1.35955	6.58187	30.9685	30.7998	4.13476	21.4731	4.30353	1.43451	7.71365	0.506297	1.94081	43.7947	2.36272	0.17622	2.78464
357A	1.64225	9.27871	114.136	50.9919	21.7598	0.246338	0.258225	0.410563	4.51619	46.8269	1.13482	5.74788	29.889	29.2321	3.77718	19.6999	4.02351	0.903238	7.37469	0.492675	1.80648	44.3408	2.21704	0.261398	2.70971
357B	0.280272	8.78185	103.42	51.7569	21.8612	0.373696	0.3737	0.46712	4.20408	42.9119	1.22586	10.9306	30.0825	30.1759	4.01723	20.0444	4.76462	1.68163	7.9007	0.46712	1.58821	43.3487	2.52245	0.22778	2.70929
357C	1.02201	8.77229	103.223	50.5897	20.6958	0.255504	0.394485	0.425839	4.5139	44.7485	1.05447	10.3905	23.5063	29.9791	3.83255	20.6311	4.59906	1.27752	7.43371	0.511007	1.61819	42.8394	2.46987	0.275659	2.29953
357D	1.09195	9.23954	105.499	51.8254	23.0149	0.251987	0.30238	0.419979	4.53577	46.5899	1.38465	10.8355	26.3747	31.0785	4.1158	21.6825	5.12375	1.34393	7.89816	0.503975	1.67992	43.5938	2.35188	0.252403	2.77186
357E	0.525677	8.41084	98.6521	50.465	20.9395	0.262839	0.242313	0.350452	3.76735	42.6147	1.27134	10.6012	25.6706	30.0512	3.67974	19.5118	4.99393	1.75226	6.71073	0.438064	1.57703	44.6826	2.45316	0.280003	2.54077
358A	1.22074	10.2354	114.374	58.2199	24.8843	0.281709	0.414865	0.469515	4.13173	49.6399	2.02648	6.38541	34.7441	29.5795	4.41344	18.2563	3.66222	1.69025	7.01849	0.657321	1.97196	55.4967	2.34758	0.330701	3.1927
358B	1.22074	9.50433	109.343	60.0778	24.066	0.174391	0.453316	0.435978	4.70857	47.9775	2.01189	11.7714	30.4313	28.7746	4.0982	19.1994	4.011	1.9183	7.32044	0.523174	1.83111	56.154	2.26709	0.356589	3.05185
358C	0.240935	9.87835	108.903	59.3504	24.977	0.321247	0.352284	0.481871	4.97933	53.3904	1.73128	11.324	26.262	27.3863	4.0959	19.7678	3.85497	1.60624	7.59953	0.562183	1.92748	54.7727	2.48967	0.214787	2.97154
358D	1.25051	10.0934	111.206	61.9897	25.0103	0.267967	0.382703	0.446612	4.28748	46.4905	2.1771	7.32444	29.4764	27.8686	4.19815	18.0426	3.48357	1.69713	6.726	0.625257	1.78645	57.9702	2.32238	0.281086	3.12628
358E	1.18683	9.15555	105.119	53.4921	22.0411	0.254321	0.222975	0.423868	4.40823	49.1068	1.75688	11.0206	27.8905	27.6362	3.81481	18.8456	4.1539	1.52592	7.23384	0.508641	1.78024	49.9316	2.28889	0.257552	2.79753
359A	1.13354	9.76592	107.425	56.6772	24.6764	0.261587	0.38983	0.348783	5.23174	51.0808	1.805	11.3354	29.2977	28.6874	4.0982	20.8329	4.0982	1.39513	7.53921	0.523174	1.83111	53.1894	1.52317	0.24721	3.57502
359B	1.14997	9.55361	104.736	57.0563	23.7071	0.265378	0.409717	0.353838	4.51143	38.2878	1.78624	10.5267	27.2455	23.9725	3.89221	18.2465	3.53838	1.50381	6.21493	0.442297	1.76919	51.1295	1.59227	0.283744	3.00762
359C	1.06012	8.77005	98.4944	51.0783	23.1298	0.192748	0.349433	0.289122	3.27672	32.9804	1.97075	10.312	28.5268	24.1899	3.56584	19.1212	4.52959	1.54199	7.18909	0.385497	1.44561	47.9943	1.73473	0.153415	3.85497
359D	0.254321	9.40987	102.152	53.5769	24.2452	0.254321	0.390122	0.339094	4.66255	38.6534	1.80307	10.4271	27.8057	24.6691	3.89958	17.7166	3.64526	1.52592	6.28787	0.423868	1.52592	49.9316	1.6107	0.266592	3.56049
359E	0.289122	10.312	107.746	56.4753	23.4189	0.289122	0.348922	0.385497	5.01146	40.7422	1.90581	6.74619	30.647	27.8521	3.95134	19.5047	4.33684	1.63836	7.33858	0.578245	1.63836	49.3436	2.31298	0.258164	3.75859
360A	0.255504	9.5388	102.627	54.4223	23.4212	0.170336	0.310135	0.425839	4.17323	36.932	1.36984	10.3053	26.5724	24.0173	3.57705	18.1615	4.34356	1.44785	6.16978	0.425839	1.61819	46.161	1.84067	0.230024	3.32155
360B	1.04139	9.3725	102.23	53.9787	23.3445	0.173565	0.443461	0.433912	4.4259	42.3707	1.348	11.0214	26.2083	24.733	3.81843	18.8488	5.03338	1.38852	6.33287	0.433912	1.73565	47.6436	1.73565	0.252695	3.03738
360C	0.278849	10.5963	110.052	64.0423	26.2118	0.278849	0.240603	0.464749	4.83338	44.7113	1.721	11.9905	28.4426	27.8849	4.36864	18.6801	5.39108	1.58014	6.68222	0.557698	1.85899	56.8852	1.95194	0.285522	3.53209
360D	1.83111	10.4373	112.613	64.6382	26.1849	0.183111	0.432741	0.457777	4.76088	43.8931	1.71449	11.8107	27.1004	28.1991	4.30311	19.9053	5.58488	1.55644	7.02063	0.549333	1.73955	55.7573	1.92266	0.255619	3.66222
360E	0.271947	9.97139	110.864	55.6585	23.1155	0.181298	0.471602	0.362596	4.98569	41.6148	1.10138	11.3311	28.5544	25.2911	3.80726	17.2224	4.89504	1.54103	6.12806	0.453245	1.81298	46.7749	1.81298	0.309764	3.17271
361B	1.17844	10.1527	101.708	59.8283	24.2033	0.271947	0.420086	0.453245	3.71661	36.6139	1.34019	6.79867	29.0077	27.5573	3.80726	17.3729	5.89218	1.63168	6.45747	0.543894	1.63168	52.3045	1.99428	0.187182	3.62596
361C	0.262839	10.864	101.018	62.2051	26.1963	0.262839	0.466572	0.438064	4.38064	42.0967	1.27134	5.95768	29.4379	28.0361	3.94258	19.0605	6.48335	1.57703	6.12991	0.525677	1.48942	51.6916	1.92748	0.182729	4.03019
361D	1.20835	11.3399	104.011	64.0423	26.8625	0.371799	0.382809	0.464749	4.08979	37.4917	1.63323	11.6187	32.3465	25.84	4.08979	19.6523	4.46159	1.4872	6.42205	0.557698	1.76604	54.8403	1.85899	0.219488	4.08979
361E	1.02766	9.52924	93.6108	52.0371	21.9546	0.280272	0.363098	0.373696	3.17641	35.1737	1.31076	9.90294	27.6535	22.9823	3.73696	16.6911	4.01723	1.40136	5.86122	0.46712	1.58821	46.4317	1.68163	0.148287	2.89614
362A	0.277441	9.98787	110.606	55.7656	23.1201	0.184961	0.523282	0.369921	3.69921	40.4171	1.8708	11.6525	29.1313	24.2298	3.79169	18.3397	3.79169	1.57216	6.38433	0.462401	1.66464	50.9566	2.12705	0.245209	3.23681
362B	2.01326	10.5457	117.632	59.6309	26.7476	0.287609	0.32374	0.383478	3.83478	47.2791	1.88521	12.5589	36.3346	25.7889	4.12239	20.7461	3.83478	1.91739	7.13899	0.479348	1.82152	53.687	1.87609	0.290899	4.02652
362C	1.14997	9.73053	109.336	58.0294	26.4494	0.265378	0.403792	0.442297	3.36146	39.918	2.23345	7.69597	39.9836	23.2648	3.89221	18.1424	3.44992	1.23843	7.40949	0.530756	1.59227	57.8524	1.50381	0.272994	3.80375
362D	1.22619	10.1365	107.823	61.3912	26.9762	0.245238	0.422841	0.490476	3.92381	41.0498	1.92077	11.6897	37.6849	24.6055	4.00555	17.7094	3.0246	1.30794	6.21809	0.572222	1.63492	57.4674	1.9619	0.232903	3.92381
362E	1.18136	9.78842	109.107	56.2834	24.6398	0.337532	0.405582	0.337532	3.88161	46.4584	2.09624	11.9824	33.3312	25.1461	3.79723	19.8873	4.13476	1.51889	7.23919	0.421915	1.77204	52.5706	2.27834	0.171641	3.37532
363A	0.284628	10.4364	117.741	57.9693	25.4268	0.189752	0.43817	0.379504	5.31306	50.5221	2.43677	12.3339	37.3812	27.8936	4.3643	22.2963	5.31306	1.51802	7.7562	0.569257	1.80265	53.7948	1.9924	0.239002	3.70017
363B	1.23248	10.3	112.243	59.0709	26.1461	0.264102	0.435196	0.44017	4.92991	46.2084	2.12776	3.52136	39.0871	24.2094	3.96153	20.0459	3.78547	1.23248	7.31828	0.528205	1.84872	54.6692	1.67265	0.250199	3.69743
363C	1.09698	9.45089	108.179	54.0051	23.6272	0.253149	0.431843	0.421915	5.06297	47.6029	2.17054	6.58187	28.7746	24.3023	3.62847	19.62	4.13476	1.09698	7.17657	0.506297	1.68766	49.364	1.51889	0.214638	3.4597
363D	0.256698	9.92564	106.102	56.3879	24.4718	0.342263	0.417983	0.427829	4.62056	38.7615	2.34911	12.3215	30.7181	24.5574	3.93603	18.6013	4.19273	1.11236	7.36753	0.513395	1.45462	53.1364	2.39584	0.179127	3.93603
363E	0.270607	10.1027	115.64	56.7373	25.1665	0.270607	0.34661	0.451012	4.60032	42.0318	2.27001	12.1773	31.3002	25.1665	3.96891	20.2436	4.32972	1.71385	7.61757	0.541215	1.62364	52.3174	2.43547	0.205965	3.7885
364A	0.270607	9.02024	109.416	55.7451	23.0918	0.270607	0.457275	0.451012	3.33749	34.4057	1.64779	6.76518	28.5942	21.6486	3.96891	17.7409	2.88648	1.89425	6.98203	0.541215	1.62364	50.4232	1.44324	0.266194	2.97668
364B	0.179521	9.33507	110.226	52.9585	23.6069	0.269281	0.211771	0.448801	3.76993	41.7793	1.86308	5.47538	29.3516	22.6196	3.85969	18.9153	3.68017	1.52592	7.44439	0.538562	1.70544	50.0862	1.43616	0.163995	2.96209
364C	1.01259	9.28212	101.85	55.7771	25.568	0.337532	0.385056	0.421915	3.71285	37.3984	1.80532	12.0668	32.9937	24.3023	3.88161	18.836	3.20655	1.43451	7.66121	0.421915	1.68766	53.1612	1.7063	0.218732	3.79723
364D	1.12338	9.92319	107.844	55.6073	23.9654	0.280845	0.567094	0.37446	3.65098	38.7671	2.03743	12.1699	32.4844	25.3697	3.83821	19.3864	3.55737	1.59145	7.69832	0.468075	1.77868	52.8925	1.77868	0.185324	3.37014
364E	0.264102	9.24358	105.817	52.6444	23.4171	0.264102	0.306815	0.352136	3.8735	41.1473	1.61726	11.4444	30.6359	24.4735	3.69743	19.1248	4.04957	1.67265	7.22017	0.44017	1.67265	49.6512	1.67265	0.207926	3.25726
365A	1.24848	10.2376	108.202	60.5098	26.0517	0.249697	0.258005	0.416161	4.9107	45.4907	2.15606	10.8202	29.4642	24.8032	4.07838	20.6286	3.66222	1.58141	7.14891	0.499393	1.74788	58.429	1.66464	0.171046	3.82868
365B	1.16119	10.0934	104.239	54.844	23.8491	0.267967	0.344174	0.446612	4.10883	36.551	1.7324	10.6294	30.191	22.5986	3.93019	19.0806	3.48357	1.69713	7.26697	0.446612	1.6078	51.0924	1.78645	0.20027	3.66222
365C	1.24848	10.6537	112.696	59.0949	26.8008	0.249697	0.384938	0.499393	4.24484	39.1013	1.90749	12.9842	32.3773	23.9709	4.16161	18.2204	3.16282	1.58141	7.0357	0.665858	1.66464	57.5135	1.83111	0.208973	3.66222
365D	1.02201	8.43162	90.1076	52.6337	21.1216	0.255504	0.267838	0.340671	3.06604	30.0453	1.53187	9.96464	23.5063	22.2288	3.74739	16.9405	2.81054	1.61819	6.55079	0.425839	1.44785	48.8012	1.61819	0.218038	2.89571
365E	1.16525	10.0711	106.038	55.0165	23.305	0.249697	0.348099	0.332929	4.49454	43.5822	1.58934	11.5693	27.4666	24.1373	3.82868	18.0421	3.49575	1.41495	6.33289	0.499393	1.83111	48.6076	1.91434	0.237582	3.16282
366A	0.431865	8.55093	86.7186	53.8104	21.5933	0.345492	0.242659	0.345492	2.2457	24.4653	1.20001	9.84653	25.6528	21.075	3.36855	15.0947	2.2457	1.46834	6.2333	0.518238	1.38197	50.3555	1.78521	0.222116	3.02306
366B	1.22074	8.98115	97.572	61.7345	24.938	0.348783	0.275424	0.523174	4.35978	37.3477	1.42398	11.5098	35.9246	27.7282	3.92381	16.9055	2.70307	1.30794	7.26785	0.523174	1.74391	58.7699	1.77521	0.230039	3.66222
366C	0.718082	9.24531	96.8513	59.0622	24.2353	0.359041	0.43194	0.448801	3.14161	31.5111	1.37301	10.7712	28.454	24.6841	3.76993	16.7794	3.05185	1.70544	6.62254	0.448801	1.52592	53.3176	1.79521	0.266879	3.59041
366D	1.2716	9.07077	89.2666	64.0888	25.093	0.254321	0.270455	0.423868	4.83209	36.5317	1.65933	11.5292	37.1308	27.0428	3.64526	16.2599	3.05185	1.18683	7.13944	0.508641	1.6107	58.4938	2.20411	0.228101	3.89958
366E	1.21495	9.54607	94.1589	61.2684	24.4726	0.260347	0.240972	0.433912	4.25234	37.7723	1.48118	9.63285	34.2791	25.8612	3.81843	17.8883	3.12417	0.954607	7.1527	0.607477	1.56208	56.1482	2.16956	0.268703	3.81843
367A	1.14444	9.06018	100.52	58.9388	23.3657	0.286111	0.530496	0.381481	3.24259	34.396	1.50889	11.063	27.562	26.2268	3.81481	18.9382	3.81481	1.62129	7.31346	0.476851	1.62129	53.7888	1.81204	0.272795	3.33796
367B	1.25664	9.15555	95.5049	62.2936	24.9533	0.359041	0.221089	0.448801	4.03921	33.9576	1.48962	6.5525	31.8649	26.9281	3.85969	17.5994	3.14161	1.3464	7.20904	0.538562	1.61568	58.0749	2.06449	0.173189	3.68017
367C	1.20835	8.64432	95.5523	63.4846	25.3753	0.278849	0.287692	0.371799	5.20518	42.494	1.32587	11.5258	29.3721	28.3497	3.81094	18.9063	3.43914	1.39425	7.71836	0.464749	1.58014	57.5359	2.04489	0.233861	3.99684
367D	0.287609	9.49109	99.1292	63.0822	25.5972	0.287609	0.449577	0.383478	3.83478	37.3321	1.46607	11.025	27.8981	27.7063	3.93065	19.6033	4.12239	1.62978	7.67644	0.479348	1.43804	58.5763	1.82152	0.210234	3.93065
367E	0.976592	8.54518	97.2522	55.5843	23.7637	0.244148	0.333969	0.406913	4.63881	38.7603	1.52658	4.47604	24.8217	25.7983	3.66222	18.5068	4.06913	1.30212	7.14816	0.488296	1.3835	52.4918	2.44148	0.226304	3.33669
368A	0.249697	8.73938	94.5518	51.8537	22.223	0.249697	0.168679	0.416161	3.82868	38.3841	2.02891	10.3208	28.8816	23.3883	3.74545	16.8044	2.74666	1.33172	6.09945	0.499393	1.58141	49.9393	1.58141	0.215721	2.99636
368B	1.20922	10.2784	113.926	60.1157	25.0482	0.259119	0.268865	0.431865	4.57777	41.6323	2.28801	11.8331	28.5895	27.6394	4.14591	19.0246	3.88679	1.81383	6.45718	0.518238	1.90021	56.7471	1.81383	0.208963	3.36855
368C	0.257903	9.62837	107.202	62.1545	24.7587	0.257903	0.331671	0.515805	4.47031	43.6962	2.25891	12.2934	31.2062	30.5185	4.12644	18.2177	3.95451	1.54742	6.7984	0.601773	1.71935	58.8878	2.32112	0.263908	3.26677
368D	1.23843	9.02286	101.64	62.4523	27.5993	0.265378	0.421979	0.530756	4.15759	45.251	2.30157	7.60751	29.3685	29.6339	4.15759	17.8011	3.62683	1.59227	6.5827	0.619216	1.68073	58.8255	1.83076	0.210513	3.273
368E	0.277441	10.2653	111.901	59.4648	24.2298	0.277441	0.356245	0.462401	3.51425	33.4247	2.2416	11.8375	30.1486	26.0794	3.97665	18.7007	3.69921	1.66464	7.4559	0.554882	1.66464	54.1934	1.84961	0.238966	3.42177
369A	1.1154	9.66677	94.4369	56.6064	24.1669	0.371799	0.32243	0.464749	2.97439	27.7607	2.15721	10.5033	30.4875	26.8625	3.71799	16.1014	3.43914	1.4872	6.29026	0.557698	1.67309	51.68	2.13784	0.260784	3.43914
369C	1.04907	9.25092	93.2721	53.8842	22.412	0.286111	0.416004	0.286111	2.575	24.6829	1.86711	10.2046	26.799	23.4611	3.5287	16.6996	2.67037	1.52592	6.52159	0.476851	1.52592	49.8786	1.62129	0.197946	3.24259
369D	0.261587	9.50433	105.332	54.3229	22.5837	0.261587	0.432177	0.435978	3.57502	35.2303	1.995	10.6379	26.5075	26.8563	3.74941	16.9725	3.22624	1.39513	6.10086	0.523174	1.74391	49.4399	1.9183	0.243558	2.87746
369E	1.13354	10.2891	107.774	56.0668	23.194	0.261587	0.285843	0.435978	3.31344	31.591	2.32679	10.6379	28.8618	25.6355	3.74941	17.1461	3.48783	1.65672	6.49335	0.523174	1.65672	49.7887	1.9183	0.232906	3.05185
